# Supplementary material for: Metal-free chloroamidation of indoles with sulfonamides and NaClO
Source: Royal Society of Chemistry journal article supplement (doi:10.1039/c7qo00199a), 2017-01-01

# Supporting Information

## Metal-Free Chloroamidation of Indoles with Sulfonamides and NaClO

Xiaodong Liu,<sup>§†‡</sup> Kun Tong,<sup>§†</sup> Ai Hua Zhang,<sup>‡</sup> Ren Xiang Tan,<sup>\*‡</sup> and Shouyun Yu\*

<sup>†</sup>State Key Laboratory of Analytical Chemistry for Life Science, Jiangsu Key Laboratory of Advanced Organic Materials, School of Chemistry and Chemical Engineering, Nanjing University, Nanjing 210023, China

<sup>‡</sup>Institute of Functional Biomolecules, State Key Laboratory of Pharmaceutical Biotechnology, Nanjing University, Nanjing 210023, China

### Table of Contents

|                                         |     |
|-----------------------------------------|-----|
| 1. General Methods.....                 | S2  |
| 2. Starting materials and products..... | S3  |
| 3. Mechanism Studies.....               | S5  |
| 4. General Procedure.. ..               | S13 |
| 5. Data for Compounds.....              | S14 |
| 6. NMR Spectra for All Compounds.....   | S27 |

## 1. General Methods

*NaClO* (Sodium hypochlorite solution reagent grade, available chlorine 4.00-4.99%) was purchased from Sigma Aldrich. All solvents were used without further purification. Thin layer chromatography (TLC) was performed on EMD precoated plates (silica gel 60 F254, Art 5715) and visualized by fluorescence quenching under UV light and by staining with phosphomolybdic acid or potassium permanganate, respectively. Column chromatography was performed on EMD Silica Gel 60 (300–400 Mesh) using a forced flow of 0.5–1.0 bar.  $^1\text{H}$  NMR (400 MHz),  $^{13}\text{C}$  NMR (100 MHz) and  $^{19}\text{F}$  (376 MHz) were measured on a Bruker AVANCE III–400 spectrometer. Chemical shifts are expressed in parts per million (ppm) with respect to the residual solvent peak. Coupling constants are reported as Hertz (Hz), signal shapes and splitting patterns are indicated as follows: s, singlet; d, doublet; t, triplet; q, quartet; m, multiplet. Infrared (IR) spectra were recorded on a Nicolet 6700 spectrophotometer and are reported as wavenumber ( $\text{cm}^{-1}$ ).

## 2. Starting materials and products

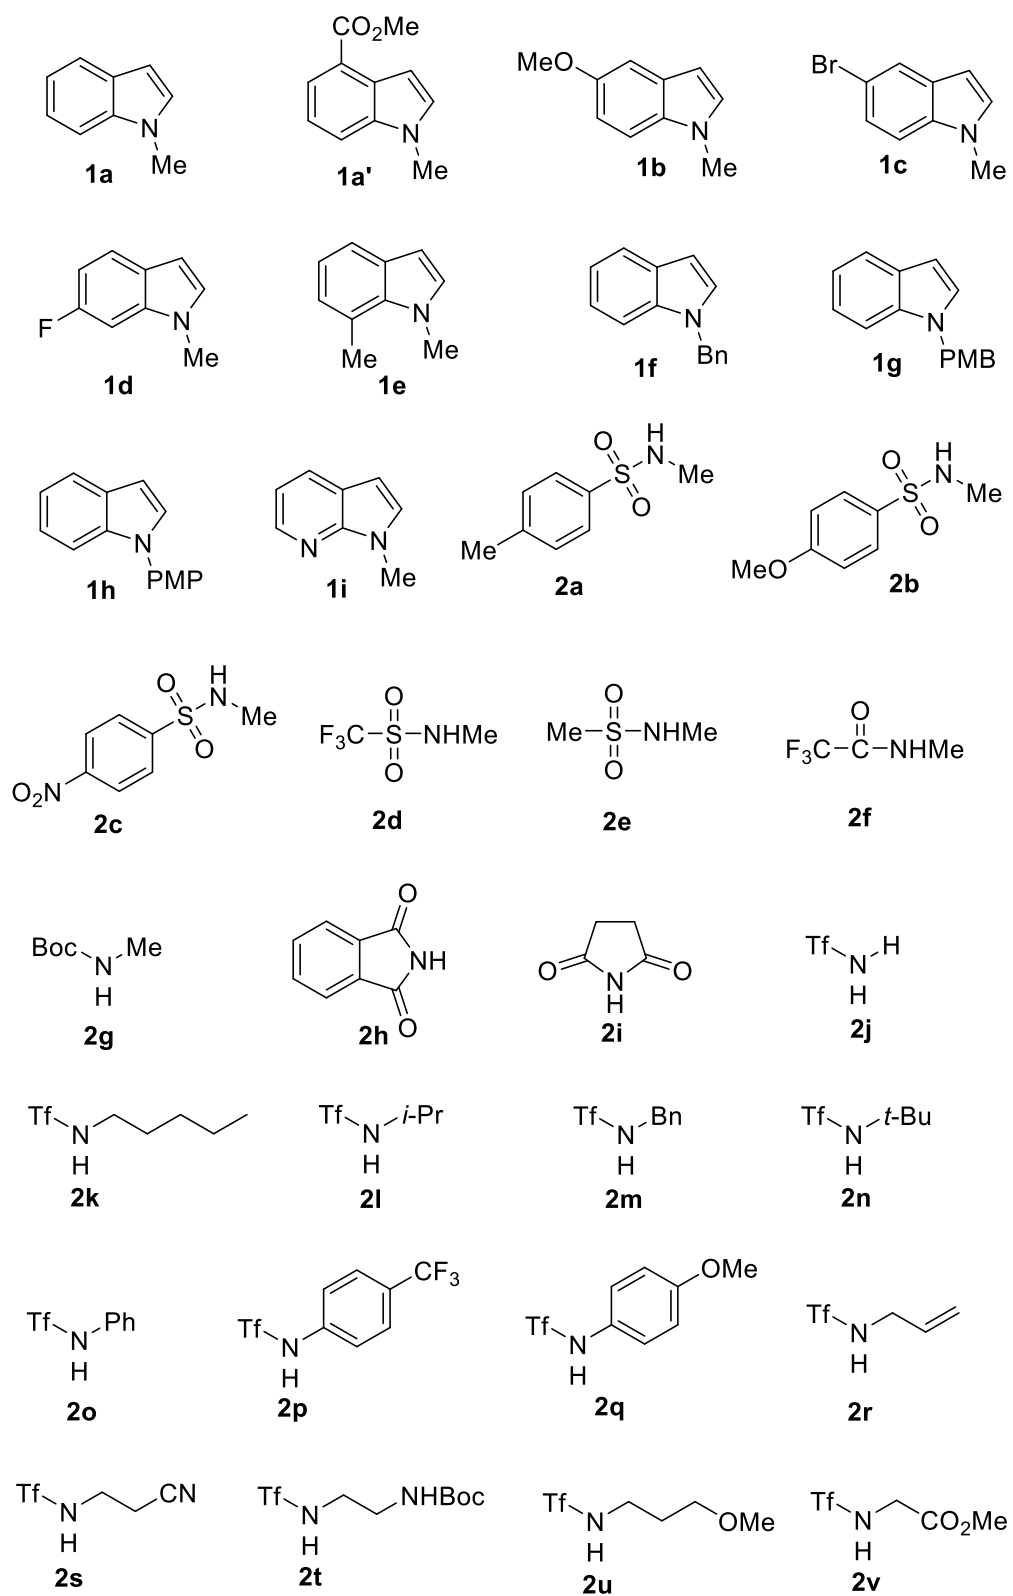

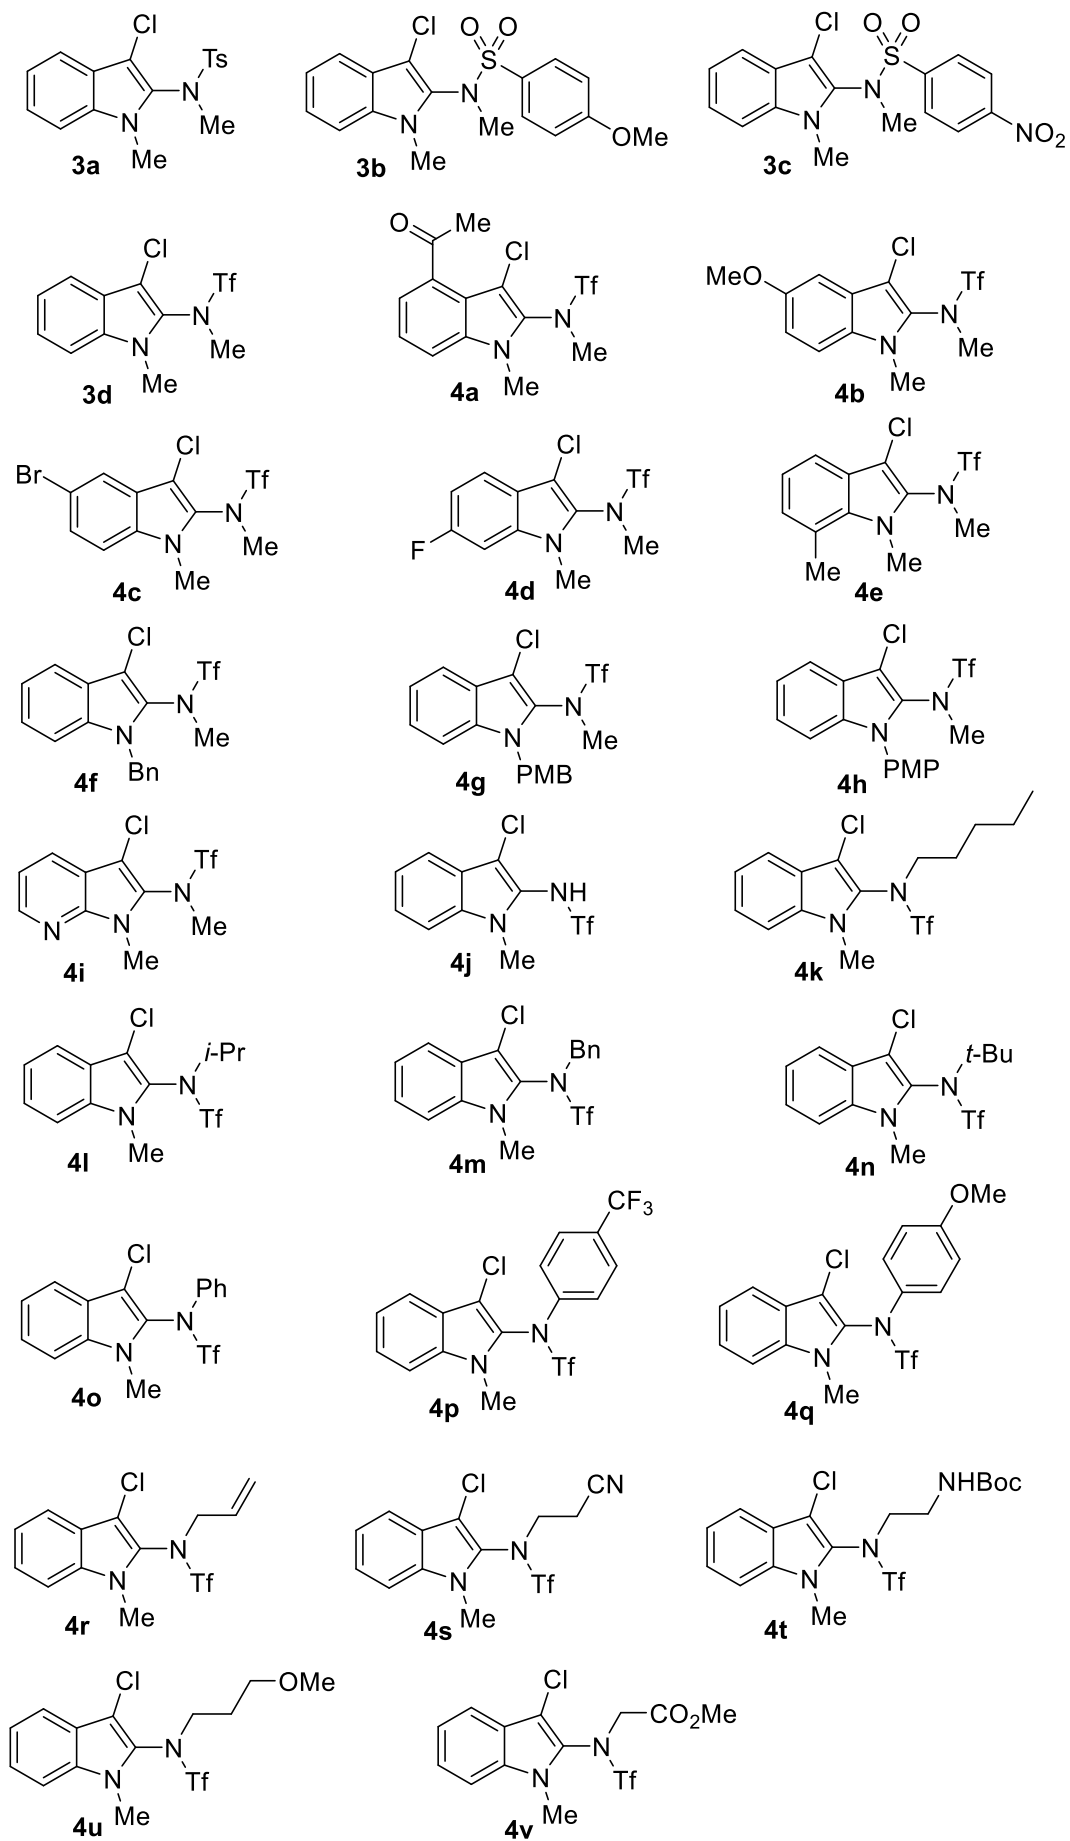

### 3. Mechanism Studies

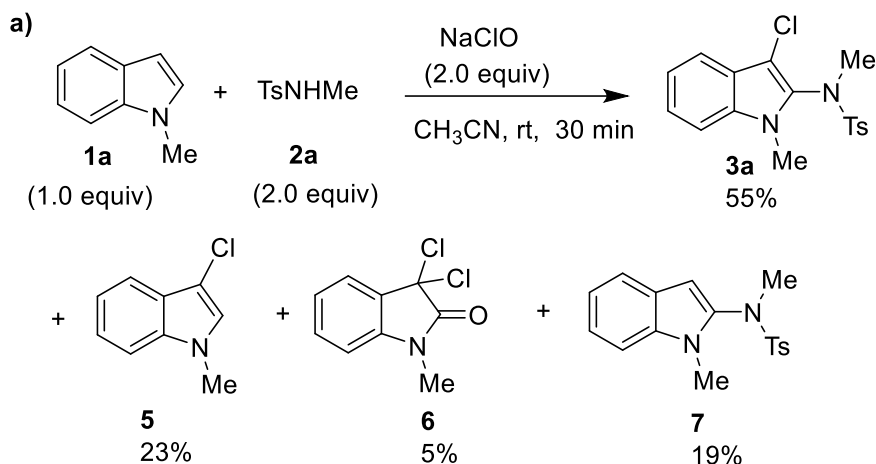

A 10 mL round bottom flask was equipped with a rubber septum and magnetic stir bar and was charged with **1a** (0.2 mmol, 26.9 mg), **2a** (0.4 mmol, 75.6 mg), NaClO (0.4 mmol, 0.52 mL) in CH<sub>3</sub>CN (4 mL) at room temperature for 10 min. **3a**<sup>1</sup> (55%), **5**<sup>2</sup> (23%), **6**<sup>3</sup> (5%) and **7**<sup>4</sup> (19%) was obtained which are in <sup>1</sup>H NMR yields by analysis of the crude reaction mixture with CH<sub>2</sub>Br<sub>2</sub> as an internal standard. Substrate **5**: <sup>1</sup>H NMR (400 MHz, CDCl<sub>3</sub>) δ 7.62 (dt, *J* = 8.0, 1.0 Hz, 1H), 7.32 – 7.23 (m, 2H), 7.17 (ddd, *J* = 8.0, 6.5, 1.5 Hz, 1H), 7.01 (s, 1H), 3.76 (s, 3H); <sup>13</sup>C NMR (100 MHz, CDCl<sub>3</sub>) δ 135.87, 125.76, 125.30, 122.65, 119.95, 118.38, 109.57, 104.37, 32.95; MS (ESI): 166.05 for [M+H]<sup>+</sup>. Substrate **6**: <sup>1</sup>H NMR (400 MHz, CDCl<sub>3</sub>) δ 7.63 (ddd, *J* = 7.6, 1.3, 0.6 Hz, 1H), 7.42 (td, *J* = 7.8, 1.3 Hz, 1H), 7.19 (td, *J* = 7.6, 1.0 Hz, 1H), 6.87 (dt, *J* = 7.9, 0.7 Hz, 1H), 3.27 (s, 3H); <sup>13</sup>C NMR (100 MHz, CDCl<sub>3</sub>) δ 168.92, 140.67, 131.93, 129.28, 124.81, 124.24, 109.15, 27.08; MS (ESI): 215.95 for [M+H]<sup>+</sup>. Substrate **7**: <sup>1</sup>H NMR (400 MHz, CDCl<sub>3</sub>) δ 7.61 (d, *J* = 8.3 Hz, 2H), 7.53 – 7.44 (m, 1H), 7.36 – 7.27 (m, 1H), 7.26 – 7.21 (m, 1H), 7.10 (ddd, *J* = 8.1, 7.0, 1.2 Hz, 1H), 5.80 (d, *J* = 0.8 Hz, 1H), 3.79 (s, 3H), 3.16 (s, 3H), 2.45 (s, 3H); <sup>13</sup>C NMR (100 MHz, CDCl<sub>3</sub>) δ 144.19, 136.89, 135.04, 132.79, 129.41, 128.66, 125.84, 122.45, 120.76, 119.88, 109.93, 96.48, 40.39, 29.41, 21.67; MS (ESI): 315.05 for [M+H]<sup>+</sup>.

<sup>1</sup> Liu, X.-Y.; Gao, P.; Shen, Y.-W.; Liang, Y.-M. *Org. Lett.* **2011**, *13*, 4196.

<sup>2</sup> Peng, X.; Shao, X.-F.; Liu, Z.-Q. *Tetrahedron Lett.* **2013**, *54*, 3079.

<sup>3</sup> Murphy, G. K.; Abbas, F. Z.; Poulton, A. V. *Adv. Synth. Catal.* **2014**, *356*, 2919.

<sup>4</sup> Tong, K.; Liu, X.; Zhang, Y.; Yu, S. *Chem. Eur. J.* **2016**, *22*, 15669.

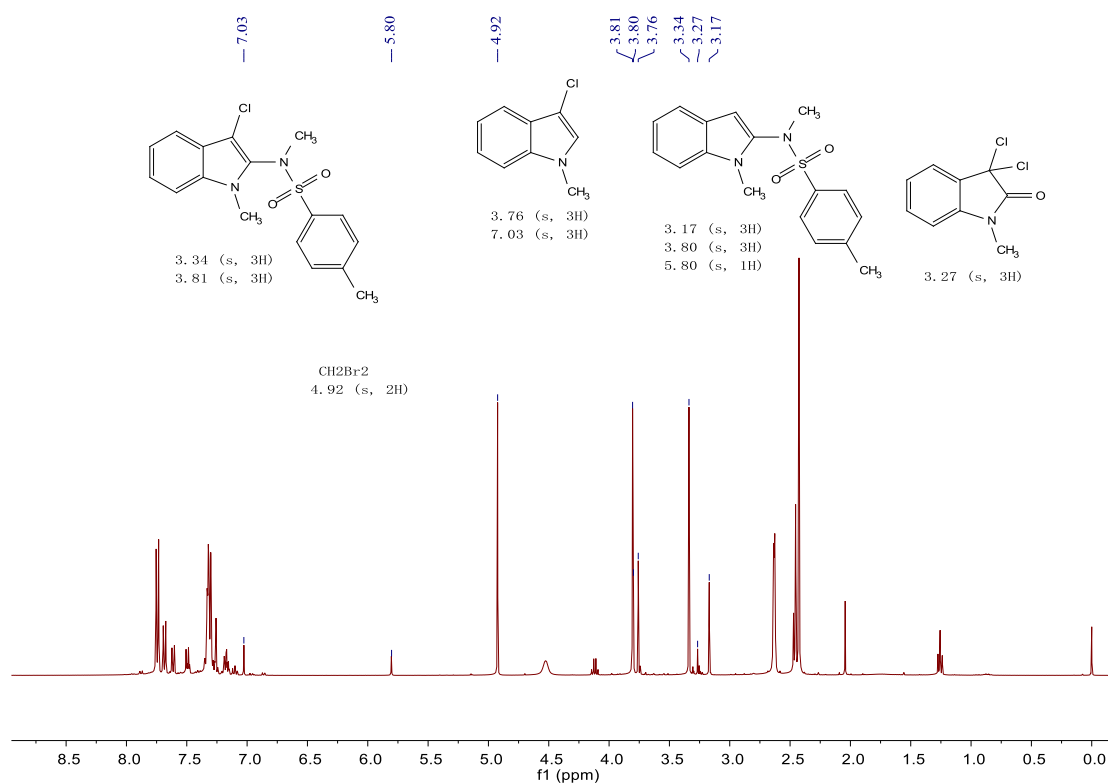

b)

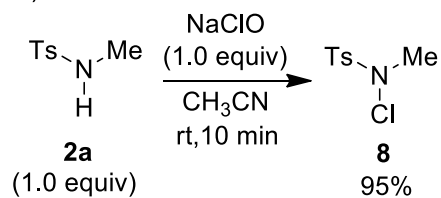

A 10 mL round bottom flask was equipped with a rubber septum and magnetic stir bar and was charged with **2a** (0.2 mmol, 37.0 mg), NaClO (0.2 mmol, 0.39 mL) in  $\text{CH}_3\text{CN}$  (4 mL) at room temperature for 10 min. **8**<sup>5</sup> was obtained in  $^1\text{H}$  NMR 95% yields by analysis of the crude reaction mixture with  $\text{CH}_2\text{Br}_2$  as an internal standard.  $^1\text{H}$  NMR (400 MHz,  $\text{CDCl}_3$ ):  $\delta$  7.83 (d,  $J$  = 8.4 Hz, 2H), 7.41 (d,  $J$  = 7.7 Hz, 2H), 3.10 (s, 3H), 2.49 (s, 3H);  $^{13}\text{C}$  NMR (100 MHz,  $\text{CDCl}_3$ ):  $\delta$  145.66, 129.85, 129.73, 128.38, 45.44, 21.74; MS (ESI): 342.00 for  $[\text{M}+\text{Na}]^+$ .

<sup>5</sup> Heuger, G.; Göttlich, R. *Beilstein. J. Org. Chem.* **2015**, *11*, 1226.

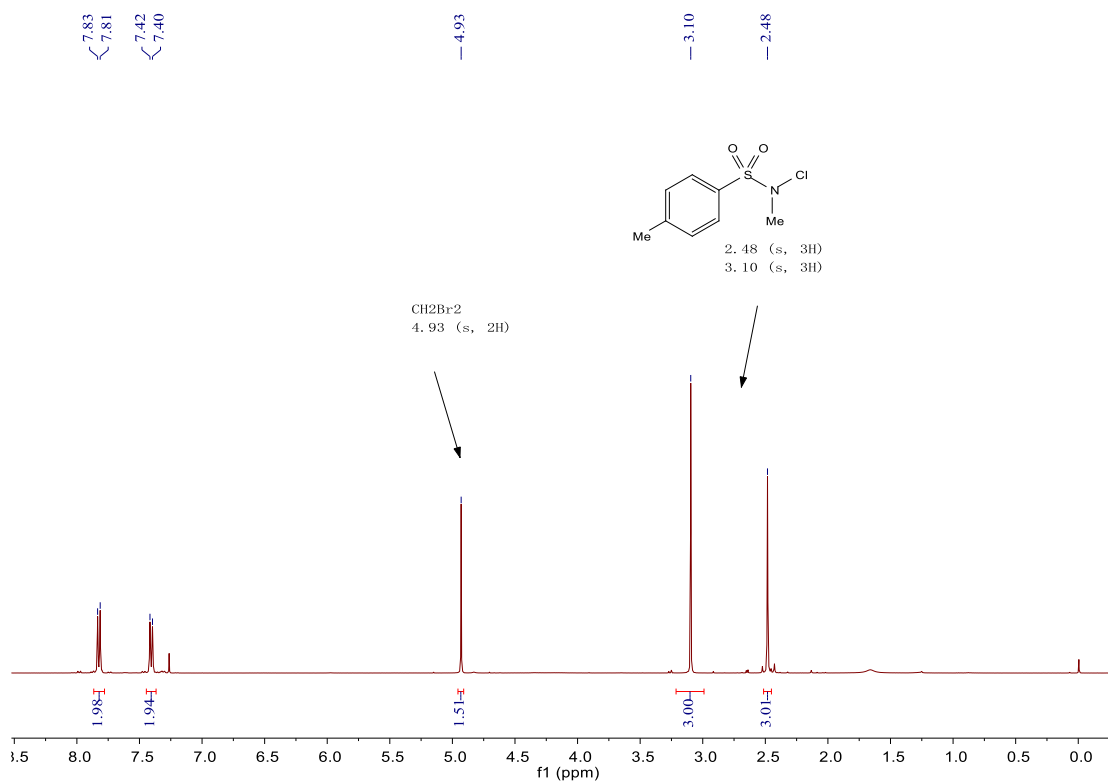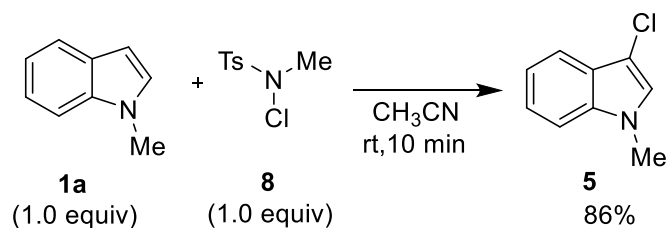

A 10 mL round bottom flask was equipped with a rubber septum and magnetic stir bar and was charged with **1a** (0.2 mmol, 27.5 mg), **8** (0.2 mmol, 43.9 mg) in CH<sub>3</sub>CN (4 mL) at room temperature for 10 min. **5** was obtained in <sup>1</sup>H NMR 86% yields by analysis of the crude reaction mixture with CH<sub>2</sub>Br<sub>2</sub> as an internal standard.

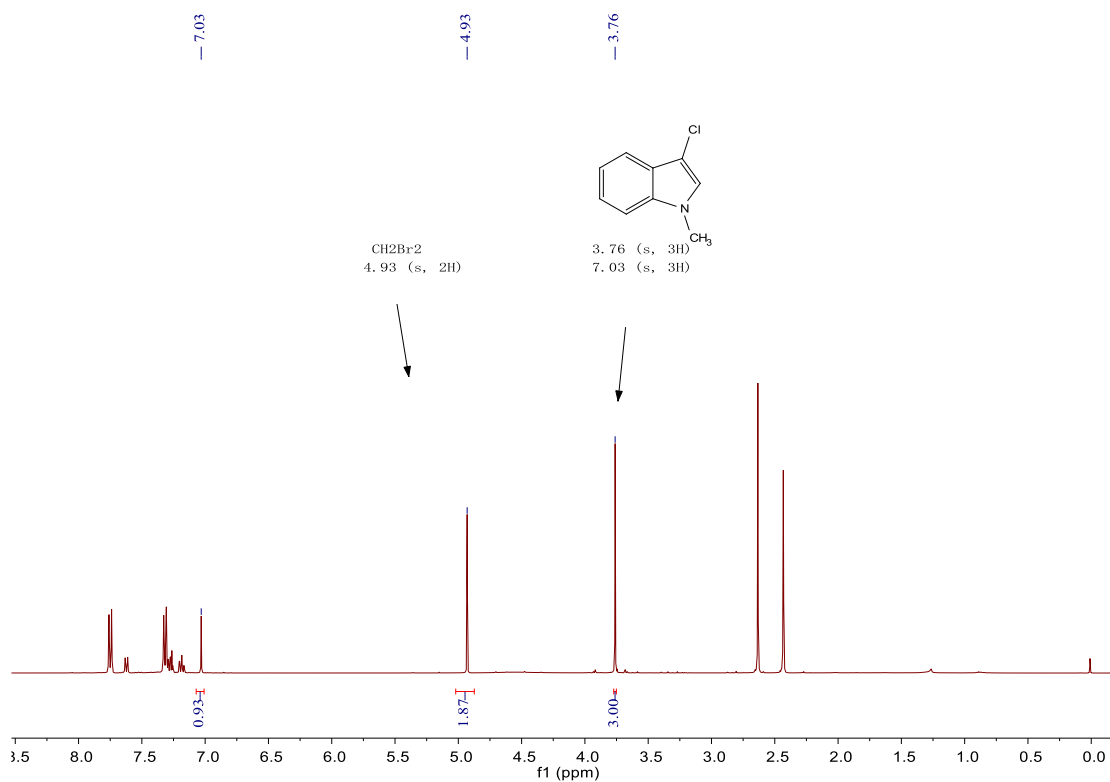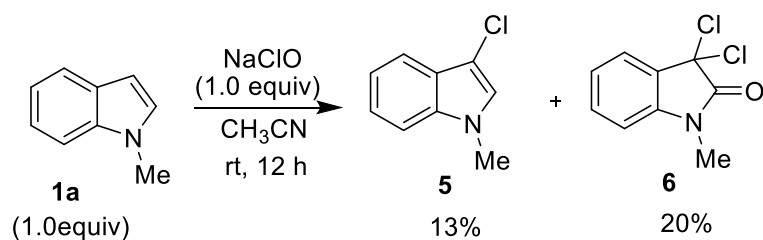

A 10 mL round bottom flask was equipped with a rubber septum and magnetic stir bar and was charged with **1a** (0.2 mmol, 26.6 mg), NaClO (0.2 mmol, 0.26 mL) in CH<sub>3</sub>CN (4 mL) at room temperature for 12 h. **5** (13%) and **6** (20%) were obtained by <sup>1</sup>H NMR analysis of the crude reaction mixture with CH<sub>2</sub>Br<sub>2</sub> as an internal standard.



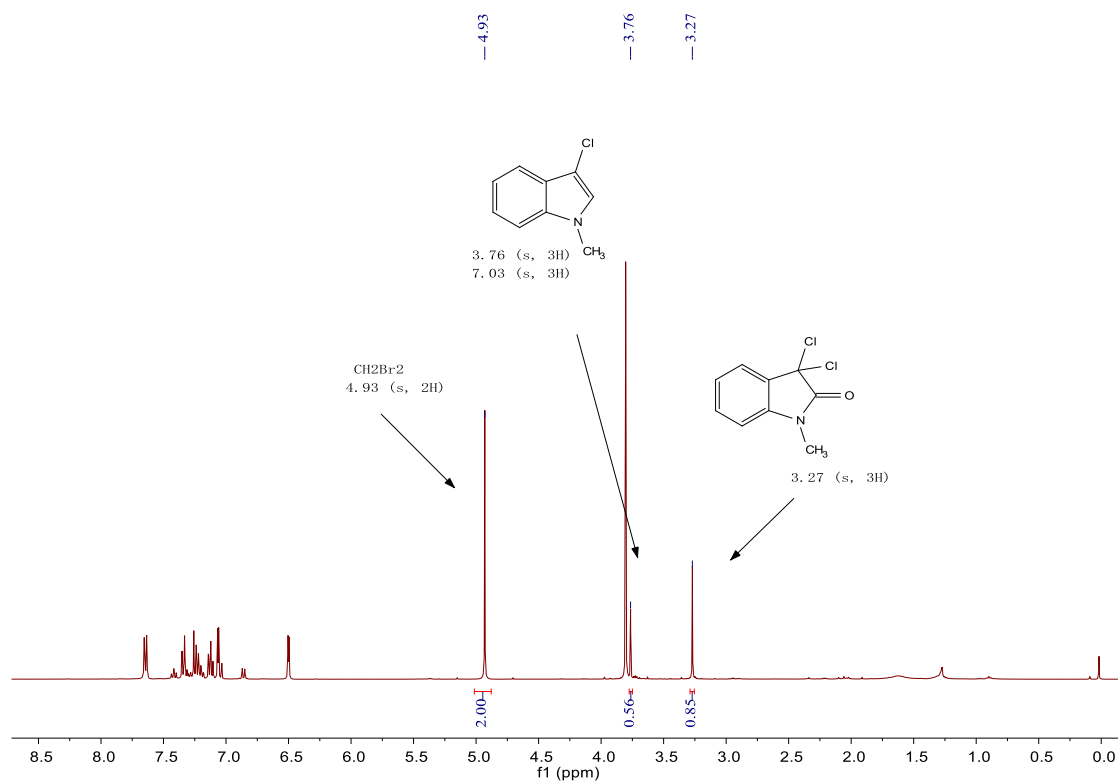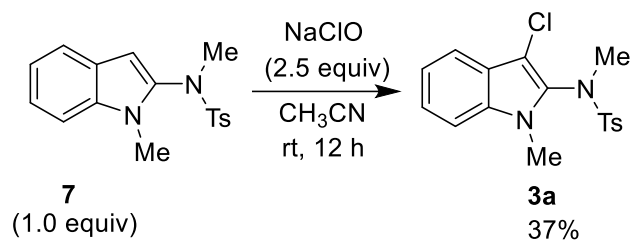

A 10 mL round bottom flask was equipped with a rubber septum and magnetic stir bar and was charged with **7** (0.2 mmol, 34.0 mg), NaClO (0.5 mmol, 0.65 mL) in CH<sub>3</sub>CN (4 mL) at room temperature for 12 h. **3a** was obtained (37%) by <sup>1</sup>H NMR analysis of the crude reaction mixture with CH<sub>2</sub>Br<sub>2</sub> as an internal standard.

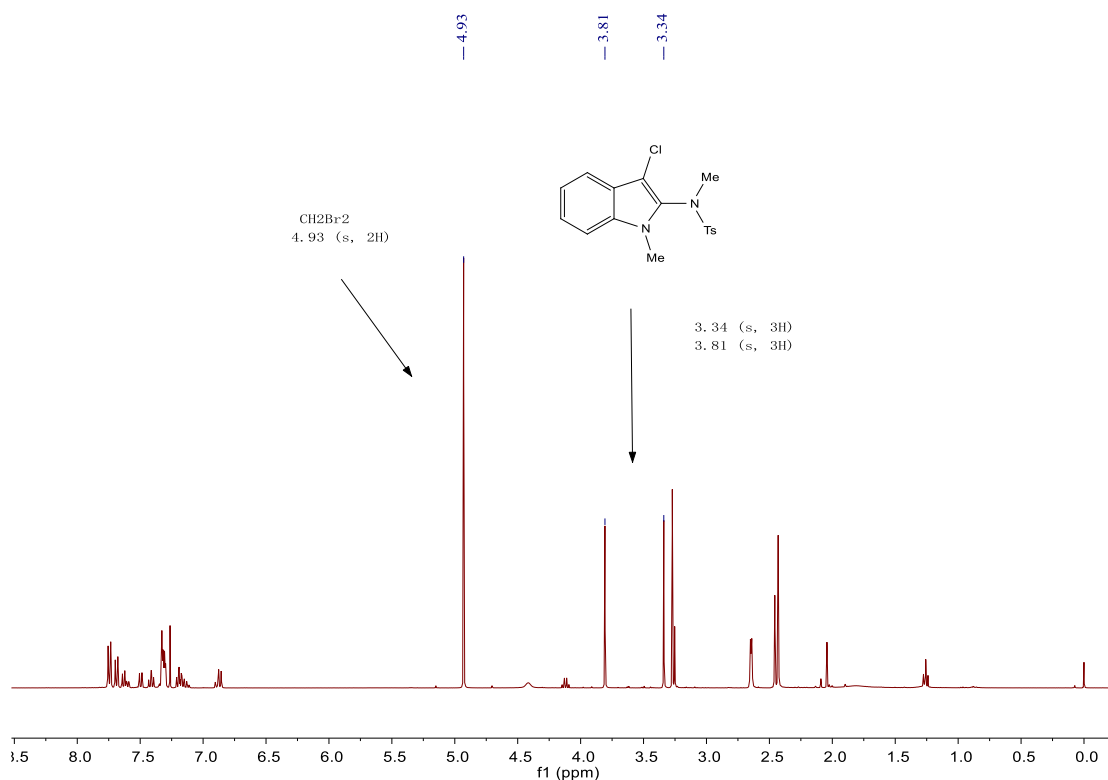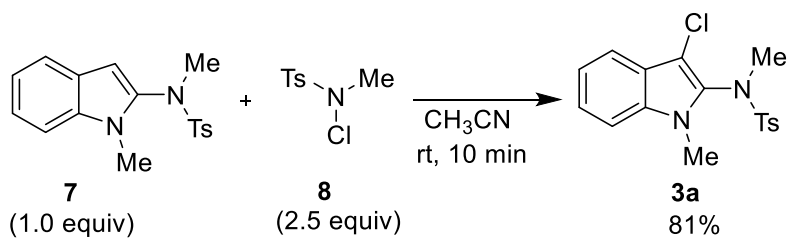

A 10 mL round bottom flask was equipped with a rubber septum and magnetic stir bar and was charged with **7** (0.2 mmol, 32.3 mg), **8** (0.5 mmol, 102.8 mg) in  $\text{CH}_3\text{CN}$  (4 mL) at room temperature for 10 min. **3a** (81%) was obtained by  $^1\text{H}$  NMR analysis of the crude reaction mixture with  $\text{CH}_2\text{Br}_2$  as an internal standard.

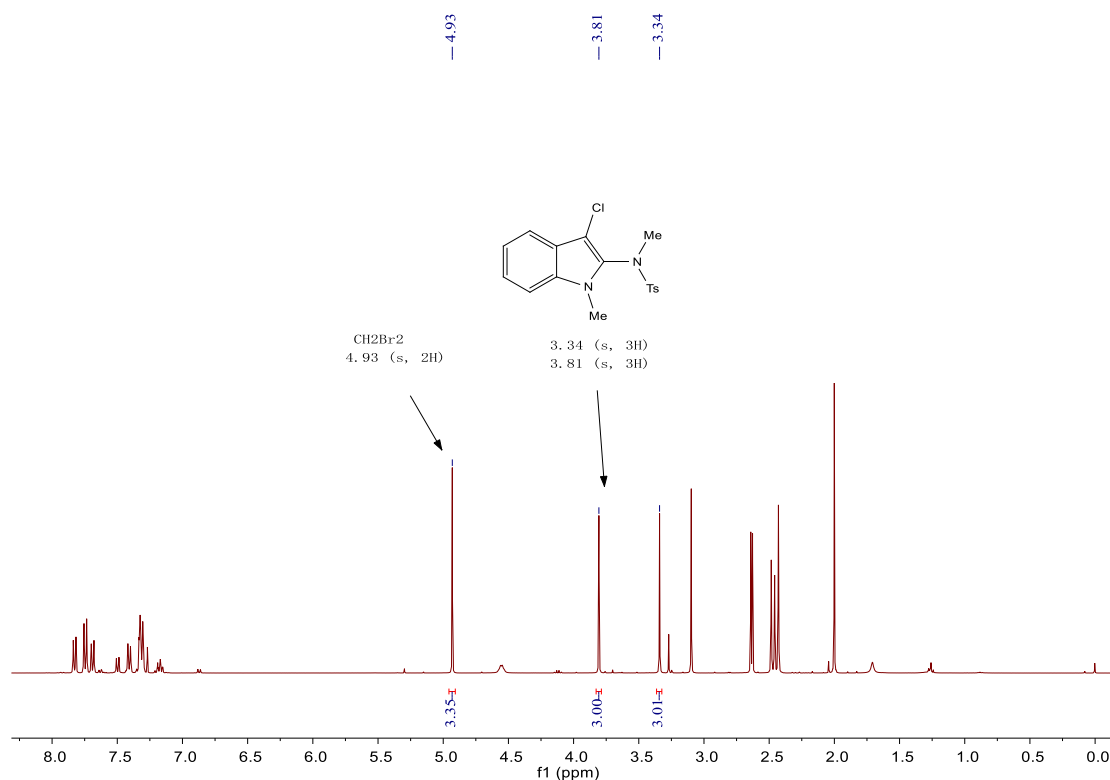

d)

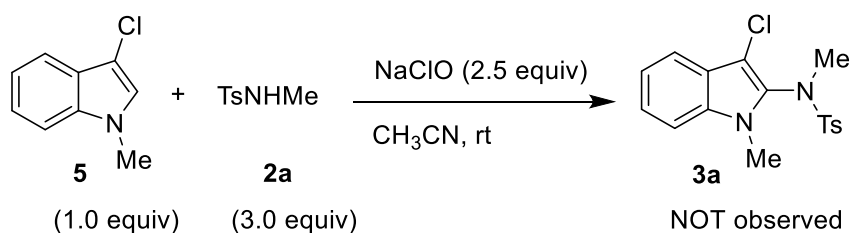

A 10 mL round bottom flask was equipped with a rubber septum and magnetic stir bar and was charged with **5** (0.2 mmol, 34.1 mg), **2a** (0.6 mmol, 113.4 mg) in CH<sub>3</sub>CN (4 mL) at room temperature for 30 min. **3a** was not observed by <sup>1</sup>H NMR analysis of the crude reaction mixture with by analysis of the crude reaction mixture with CH<sub>2</sub>Br<sub>2</sub> as an internal standard.

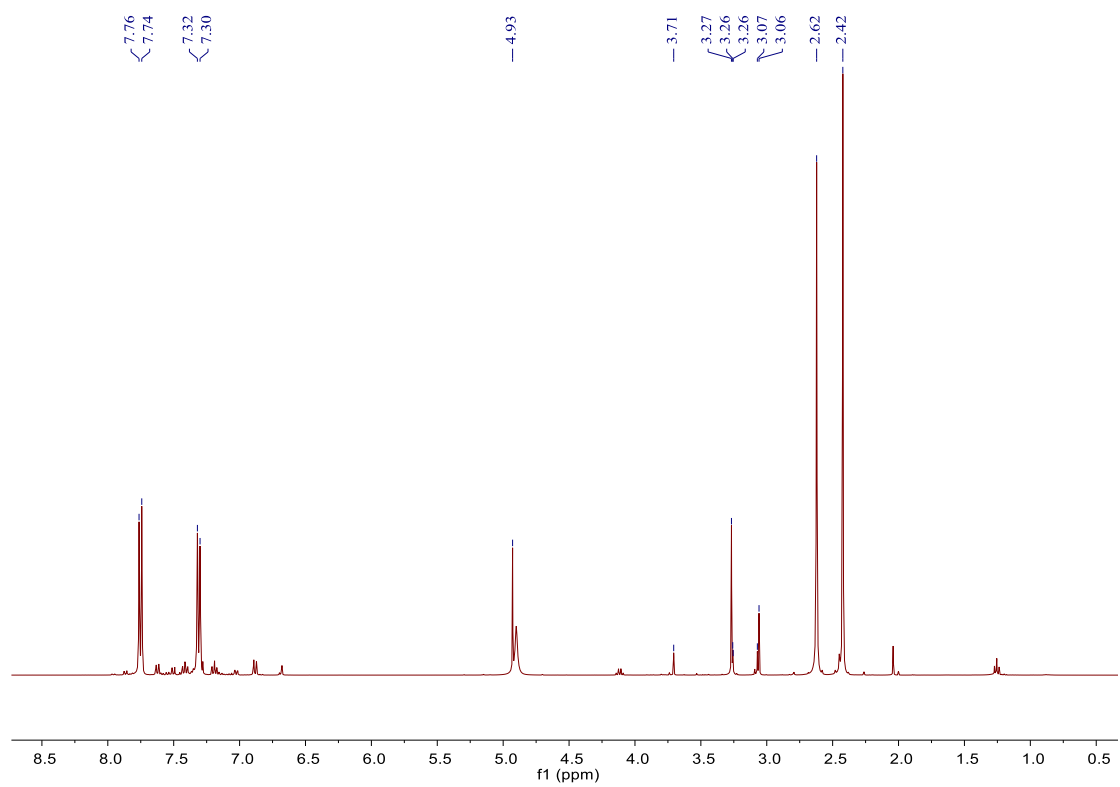

#### 4. General Procedure

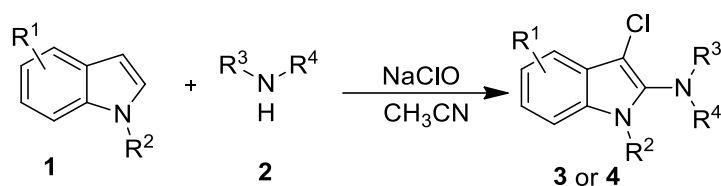

A 10 mL round bottom flask equipped with a rubber septum and magnetic stir bar was charged with indole **1** (0.2 mmol, 1.0 equiv), amide **2** (0.6 mmol, 3.0 equiv), NaClO (0.5 mmol, 2.5 equiv) in  $CH_3CN$  (4 mL) at room temperature for 30 min. Then the mixture was poured into a separatory funnel containing 5 mL of  $H_2O$  and 5 mL of ethyl acetate. The layers were separated and the aqueous layer was extracted with ethyl acetate ( $2 \times 5$  mL). The combined organic layers were dried with  $Na_2SO_4$  and concentrated under reduced pressure after filtration. The crude product was purified by flash chromatography on silica gel (petroleum ether/ethyl acetate, 50:1) to afford the desired product indole derivative **3** or **4**.

##### Notes:

NaClO (Sodium hypochlorite solution reagent grade, available chlorine 4.00 - 4.99%) was purchased from Sigma-Aldrich. Product Number: 239305

CAS Number: 7681-52-9

MDL: MFCD00011120

Formula: NaClO

Formula Weight: 74.44 g/mol

Composition available chlorine, 4.00 - 4.99%

Density 1.097 g/mL at 25 °C

Storage Temperature: 2 - 8 °C

$M [ClO^-] = \text{available chlorine} * d / 0.070906$

$M [ClO^-] = 0.05 * 1.097 / 0.070906 = 0.775M$

(The above data was provided by Sigma-Aldrich)

## 5. Data for Compounds.

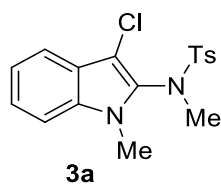

### **N-(3-chloro-1-methyl-1H-indol-2-yl)-N,4-dimethylbenzenesulfonamide (3a):**

According to the General Procedure, **3a** was obtained as a white solid (49.6 mg, 72%) from **1a**, **2a** and NaClO.  $^1\text{H}$  NMR (400 MHz,  $\text{CDCl}_3$ ):  $\delta$  7.69 (d,  $J$  = 8.4 Hz, 2H), 7.50 (d,  $J$  = 8.0 Hz, 1H), 7.29 – 7.37 (m, 4H), 7.16 – 7.21 (m, 1H), 3.35 (s, 3H), 2.47 (s, 3H);  $^{13}\text{C}$  NMR (100 MHz,  $\text{CDCl}_3$ ):  $\delta$  144.22, 134.90, 133.70, 131.16, 129.75, 128.19, 123.75, 123.69, 120.37, 118.30, 110.13, 101.16, 37.87, 30.00, 21.67; IR (neat,  $\text{cm}^{-1}$ ): 1599.42, 1550.71, 1466.81, 1385.62, 1344.29, 1236.78, 1088.98, 1067.15, 960.74, 923.51; MS (ESI): 349.05 for  $[\text{M}+\text{H}]^+$ .

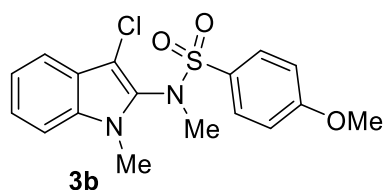

### **N-(3-chloro-1-methyl-1H-indol-2-yl)-4-methoxy-N-methylbenzenesulfonamide**

**(3b):** According to the General Procedure, **3b** was obtained as a white solid (54.4 mg, 73%) from **1a**, **2b** and NaClO. m.p. 47 – 48 °C;  $^1\text{H}$  NMR (400 MHz,  $\text{CDCl}_3$ ):  $\delta$  7.74 – 7.67 (m, 2H), 7.50 (dt,  $J$  = 7.9, 1.0 Hz, 1H), 7.35 – 7.27 (m, 2H), 7.20 – 7.13 (m, 1H), 7.00 – 6.92 (m, 2H), 3.87 (s, 3H), 3.80 (s, 3H), 3.33 (s, 3H);  $^{13}\text{C}$  NMR (100 MHz,  $\text{CDCl}_3$ ):  $\delta$  163.61, 133.70, 131.27, 130.31, 129.41, 123.76, 123.68, 120.37, 118.30, 114.34, 110.16, 100.99, 55.68, 37.86, 30.01; IR (neat,  $\text{cm}^{-1}$ ): 1595.17, 1496.61, 1468.40, 1385.62, 1347.05, 1258.68, 1233.31, 1151.66, 1090.69, 1064.74; HRMS (ESI):  $m/z$  calcd for  $\text{C}_{17}\text{H}_{18}\text{ClN}_2\text{O}_3\text{S}$   $[\text{M}+\text{H}]^+$  365.0727, found 365.0721.

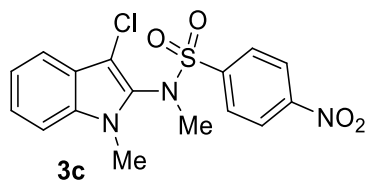

**N-(3-chloro-1-methyl-1H-indol-2-yl)-N-methyl-4-nitrobenzenesulfonamide (3c):**

According to the General Procedure, **3c** was obtained as a yellow solid (66.0 mg, 83%) from **1a**, **2c** and NaClO. m.p. 140 – 141 °C; <sup>1</sup>H NMR (400 MHz, CDCl<sub>3</sub>): δ 8.37 – 8.32 (m, 2H), 8.05 – 7.91 (m, 2H), 7.49 (d, *J* = 8.0 Hz, 1H), 7.36 – 7.34 (m, 2H), 7.21 – 7.17 (m, 1H), 3.82 (s, 3H), 3.41 (s, 3H); <sup>13</sup>C NMR (100 MHz, CDCl<sub>3</sub>): δ 150.58, 143.56, 133.81, 129.92, 129.42, 124.35, 124.25, 123.51, 120.78, 118.48, 110.28, 101.52, 38.33, 30.08; IR (neat, cm<sup>-1</sup>): 1602.13, 1528.32, 1469.03, 1346.67, 1234.73, 1160.58, 1087.25, 1009.45, 966.15; HRMS (ESI): *m/z* calcd for C<sub>16</sub>H<sub>15</sub>ClN<sub>3</sub>O<sub>4</sub>S [M+H]<sup>+</sup> 380.0472, found 380.0466.

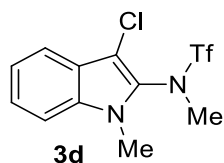

**N-(3-chloro-1-methyl-1H-indol-2-yl)-1,1,1-trifluoro-N-methylmethanesulfonamide (3d):**

According to the General Procedure, **3d** was obtained as a white solid (63.9 mg, 97%) from **1a**, **2d** and NaClO. m.p. 68 – 69 °C; <sup>1</sup>H NMR (400 MHz, CDCl<sub>3</sub>): δ 7.66 – 7.61 (d, *J* = 8.4 Hz, 1H), 7.39 – 7.28 (m, 2H), 7.26 – 7.19 (m, 1H), 3.72 (s, 3H), 3.51 (s, 3H); <sup>19</sup>F NMR (376 MHz, CDCl<sub>3</sub>): δ: -74.07; <sup>13</sup>C NMR (100 MHz, CDCl<sub>3</sub>): δ 133.84, 128.13, 124.67, 123.53, 121.06, 119.67 (q, *J* = 321.6 Hz), 118.98, 110.20, 103.47, 40.04, 29.92; IR (thin film, cm<sup>-1</sup>): 1556.12, 1469.52, 1423.51, 1402.87, 1382.83, 1334.20, 1222.21, 1180.47, 1123.36, 1059.04; HRMS (ESI): *m/z* calcd for C<sub>11</sub>H<sub>11</sub>ClN<sub>2</sub>O<sub>2</sub>S [M+H]<sup>+</sup> 327.0182, found 327.0176.

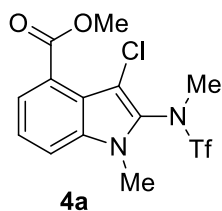

**Methyl-3-chloro-1-methyl-2-((1,1,1-trifluoro-N-methylmethanesulfonyl)amino)-1H-indole-4-carboxylate (4a):** According to the General Procedure, **4a** was obtained as a white solid (60.7 mg, 78%) from **1a'**, **2d** and NaClO. m.p. 151 – 153 °C;  $^1\text{H}$  NMR (400 MHz,  $\text{CDCl}_3$ ):  $\delta$  7.60 (dd,  $J = 7.4, 1.0$  Hz, 1H), 7.48 (dd,  $J = 8.5, 1.1$  Hz, 1H), 7.36 (dd,  $J = 8.4, 7.4$  Hz, 1H), 3.98 (s, 3H), 3.75 (s, 3H), 3.52 (s, 3H);  $^{19}\text{F}$  NMR (376 MHz,  $\text{CDCl}_3$ ):  $\delta$  -74.06;  $^{13}\text{C}$  NMR (100 MHz,  $\text{CDCl}_3$ ):  $\delta$  167.74, 134.48, 130.49, 124.80, 123.53, 123.36, 120.09, 119.68 (q,  $J = 321.4$  Hz), 113.77, 103.52, 52.17, 39.78, 30.25; IR (neat,  $\text{cm}^{-1}$ ): 2955.26, 1730.94, 1542.59, 1464.11, 1402.01, 1382.99, 1280.07, 1183.58, 953.96; HRMS (ESI):  $m/z$  calcd for  $\text{C}_{13}\text{H}_{13}\text{ClF}_3\text{N}_2\text{O}_4\text{S}$   $[\text{M}+\text{H}]^+$  385.0237, found 385.0230.

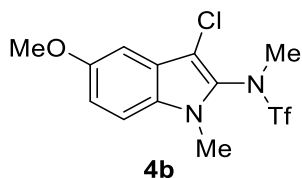

**N-(3-chloro-5-methoxy-1-methyl-1H-indol-2-yl)-1,1,1-trifluoro-N-methylmethanesulfonamide (4b):** According to the General Procedure, **4b** was obtained as a white solid (68.2 mg, 93%) from **1b**, **2d** and NaClO. m.p. 123 – 125 °C;  $^1\text{H}$  NMR (400 MHz,  $\text{CDCl}_3$ ):  $\delta$  7.27 – 7.18 (m, 1H), 7.05 – 6.97 (m, 2H), 3.87 (s, 3H), 3.69 (s, 3H), 3.51 (s, 3H);  $^{19}\text{F}$  NMR (376 MHz,  $\text{CDCl}_3$ ):  $\delta$  -74.09;  $^{13}\text{C}$  NMR (100 MHz,  $\text{CDCl}_3$ ):  $\delta$  155.12, 128.93, 128.11, 123.75, 119.91 (dd,  $J = 321.6$  Hz), 115.86, 111.36, 102.79, 99.48, 55.81, 40.03, 30.01; IR (neat,  $\text{cm}^{-1}$ ): 1492.33, 1386.17, 1290.90, 1189.6, 1124.47, 1060.87, 1028.33, 947.21, 870.29, 833.26, 793.84; HRMS (ESI):  $m/z$  calcd for  $\text{C}_{12}\text{H}_{13}\text{ClF}_3\text{N}_2\text{O}_3\text{S}$   $[\text{M}+\text{H}]^+$  357.0288, found 357.0282.



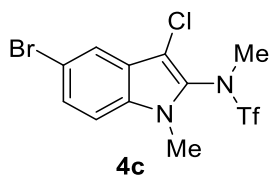

**N-(5-bromo-3-chloro-1-methyl-1H-indol-2-yl)-1,1,1-trifluoro-N-methylmethanesulfonamide (4c):** According to the General Procedure, **4c** was obtained as a white solid (70.6 mg, 89%) from **1c**, **2d** and NaClO. m.p. 154 – 155 °C;  $^1\text{H}$  NMR (400 MHz,  $\text{CDCl}_3$ ):  $\delta$  7.76 (d,  $J$  = 1.8 Hz, 1H), 7.42 (dd,  $J$  = 8.8, 1.9 Hz, 1H), 7.19 (d,  $J$  = 8.8 Hz, 1H), 3.70 (s, 3H), 3.51 (s, 3H);  $^{19}\text{F}$  NMR (376 MHz,  $\text{CDCl}_3$ ):  $\delta$  -74.04;  $^{13}\text{C}$  NMR (100 MHz,  $\text{CDCl}_3$ ):  $\delta$  132.43, 129.08, 127.74, 124.96, 121.52, 119.86 (q,  $J$  = 321.5 Hz), 114.38, 111.85, 102.84, 39.99, 30.14; IR (neat,  $\text{cm}^{-1}$ ): 1553.41, 1467.33, 1423.51, 1396.78, 1216.09, 1191.60, 1120.80, 1061.38, 1045.66, 974.15, 947.38; HRMS (ESI):  $m/z$  calcd for  $\text{C}_{11}\text{H}_{10}\text{BrClF}_3\text{N}_2\text{O}_2\text{S}$   $[\text{M}+\text{H}]^+$  404.9287, found 404.9281.

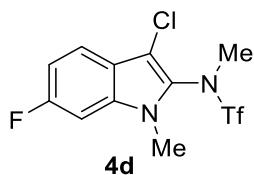

**N-(3-chloro-6-fluoro-1-methyl-1H-indol-2-yl)-1,1,1-trifluoro-N-methylmethanesulfonamide (4d):** According to the General Procedure, **4d** was obtained as a white solid (50.1 mg, 78%) from **1d**, **2d** and NaClO. m.p. 128 – 129 °C;  $^1\text{H}$  NMR (400 MHz,  $\text{CDCl}_3$ ):  $\delta$  7.56 (m, 1H), 6.99 (m, 2H), 3.68 (s, 3H), 3.52 (s, 3H);  $^{19}\text{F}$  NMR (376 MHz,  $\text{CDCl}_3$ ):  $\delta$  -74.08, -115.71;  $^{13}\text{C}$  NMR (100 MHz,  $\text{CDCl}_3$ ):  $\delta$  161.30 (d,  $J$  = 240.9 Hz), 132.87 (d,  $J$  = 12.2 Hz), 127.32 (d,  $J$  = 3.7 Hz), 119.39 (d,  $J$  = 10.2 Hz), 119.01, 118.83 (q,  $J$  = 321.5 Hz), 109.27 (d,  $J$  = 25.0 Hz), 102.82, 95.56 (d,  $J$  = 26.7 Hz), 38.99, 29.06; IR (neat,  $\text{cm}^{-1}$ ): 2953.93, 1628.47, 1472.58, 1382.15, 1221.41, 1181.57, 1124.41, 1092.15, 1057.00, 986.30; HRMS (ESI):  $m/z$  calcd for  $\text{C}_{11}\text{H}_{10}\text{ClF}_4\text{N}_2\text{O}_2\text{S}$   $[\text{M}+\text{H}]^+$  345.0088, found 345.0082.

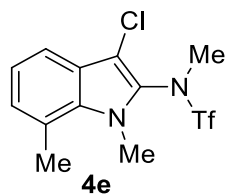

**N-(3-chloro-1,7-dimethyl-1H-indol-2-yl)-1,1,1-trifluoro-N-methylmethanesulfonamide (4e):** According to the General Procedure, **4e** was obtained as a white solid (65.9 mg, 97%) from **1e**, **2d** and NaClO. m.p. 126 – 128 °C;  $^1\text{H}$  NMR (400 MHz,  $\text{CDCl}_3$ ):  $\delta$  7.52 – 7.38 (m, 1H), 7.14 – 6.98 (m, 2H), 3.96 (s, 3H), 3.52 (m, 3H), 2.78 (s, 3H);  $^{19}\text{F}$  NMR (376 MHz,  $\text{CDCl}_3$ ):  $\delta$  -74.05;  $^{13}\text{C}$  NMR (100 MHz,  $\text{CDCl}_3$ ):  $\delta$  133.03, 128.36, 127.37, 124.36, 122.09, 121.04, 119.90 (q,  $J$  = 321.6 Hz), 116.93, 103.73, 40.02, 32.80, 20.11; IR (neat,  $\text{cm}^{-1}$ ): 1561.53, 1455.99, 1397.04, 1343.87, 1242.62, 1224.31, 1190.04, 1121.29, 1055.63, 947.58, 868.41; HRMS (ESI):  $m/z$  calcd for  $\text{C}_{12}\text{H}_{13}\text{ClF}_3\text{N}_2\text{O}_2\text{S}$   $[\text{M}+\text{H}]^+$  341.0338, found 341.0333.

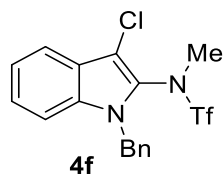

**N-(1-benzyl-3-chloro-1H-indol-2-yl)-1,1,1-trifluoro-N-methylmethanesulfonamide (4f):** According to the General Procedure, **4f** was obtained as a yellow solid (51.6 mg, 69%) from **1f**, **2d** and NaClO. m.p. 77 – 79 °C;  $^1\text{H}$  NMR (400 MHz,  $\text{CDCl}_3$ ):  $\delta$  7.73 – 7.59 (m, 1H), 7.43 – 7.18 (m, 6H), 7.14 – 6.97 (m, 2H), 5.57 – 5.29 (m, 2H), 3.04 (s, 3H);  $^{19}\text{F}$  NMR (376 MHz,  $\text{CDCl}_3$ ):  $\delta$  -73.83;  $^{13}\text{C}$  NMR (100 MHz,  $\text{CDCl}_3$ ):  $\delta$  136.63, 133.88, 129.04, 128.16, 128.00, 126.71, 125.06, 123.65, 121.22, 119.92 (q,  $J$  = 321.9 Hz), 119.08, 110.68, 104.71, 47.00, 39.63; IR (neat,  $\text{cm}^{-1}$ ): 1461.40, 1396.45, 1387.22, 1347.74, 1244.90, 1119.15, 1060.87, 960.54, 936.38, 795.56; HRMS (ESI):  $m/z$  calcd for  $\text{C}_{17}\text{H}_{15}\text{ClF}_3\text{N}_2\text{O}_2\text{S}$   $[\text{M}+\text{H}]^+$  403.0495, found 403.0489.

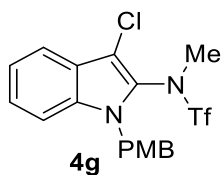

**N-(3-chloro-1-(4-methoxybenzyl)-1H-indol-2-yl)-1,1,1-trifluoro-N-methylmethanesulfonamide (4g):** According to the General Procedure, **4g** was obtained as a yellow liquid (83.9 mg, 96%) from **1g**, **2d** and NaClO.  $^1\text{H}$  NMR (400 MHz,  $\text{CDCl}_3$ ):  $\delta$  7.65 (dt,  $J = 8.0, 1.0$  Hz, 1H), 7.37 – 7.29 (m, 2H), 7.28 – 7.19 (m, 1H), 7.05 – 6.96 (m, 2H), 6.89 – 6.75 (m, 2H), 5.50 – 5.21 (m, 2H), 3.75 (s, 3H), 3.05 (s, 3H);  $^{19}\text{F}$  NMR (376 MHz,  $\text{CDCl}_3$ ):  $\delta$  -73.87;  $^{13}\text{C}$  NMR (100 MHz,  $\text{CDCl}_3$ ):  $\delta$  159.28, 133.82, 128.59, 128.15, 128.11, 119.92 (q,  $J = 321.8$  Hz), 104.58, 124.98, 123.62, 121.13, 119.04, 114.34, 110.67, 55.28, 46.52, 39.67; IR (neat,  $\text{cm}^{-1}$ ): 1512.98, 1459.71, 1400.39, 1346.40, 1224.70, 1123.75, 1070.89, 1033.13, 963.19, 939.15, 794.83; HRMS (ESI):  $m/z$  calcd for  $\text{C}_{18}\text{H}_{17}\text{ClF}_3\text{N}_2\text{O}_3\text{S}$   $[\text{M}+\text{H}]^+$  433.0601, found 433.0595.

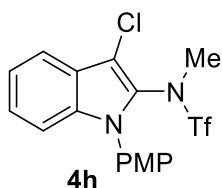

**N-(3-chloro-1-(4-methoxyphenyl)-1H-indol-2-yl)-1,1,1-trifluoro-N-methylmethanesulfonamide (4h):** According to the General Procedure, **4h** was obtained as a yellow solid (63.4 mg, 78%) from **1h**, **2d** and NaClO. m.p. 97 - 98°C;  $^1\text{H}$  NMR (400 MHz, Acetone- $d_6$ ):  $\delta$  7.72 – 7.63 (m, 1H), 7.51-7.42 (m, 2H), 7.38 – 7.25 (m, 2H), 7.21 – 7.05 (m, 3H), 3.92 (s, 3H), 3.57 (s, 3H);  $^{19}\text{F}$  NMR (376 MHz,  $\text{CDCl}_3$ ):  $\delta$  -74.21;  $^{13}\text{C}$  NMR (100 MHz,  $\text{CDCl}_3$ ):  $\delta$  160.02, 135.33, 128.96, 127.77, 125.11, 123.53, 121.51, 119.77 (q,  $J = 321.6$  Hz), 118.90, 114.81, 111.31, 105.27, 55.56, 40.52; IR (neat,  $\text{cm}^{-1}$ ): 1607.54, 1553.41, 1511.34, 1453.59, 1397.24, 1175.78, 1252.96, 1098.19, 1030.73, 952.27; HRMS (ESI):  $m/z$  calcd for  $\text{C}_{17}\text{H}_{15}\text{ClF}_3\text{N}_2\text{O}_3\text{S}$   $[\text{M}+\text{H}]^+$  419.0444, found 419.0438.

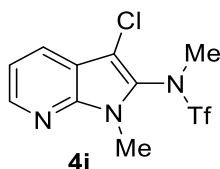

**N-(3-chloro-1-methyl-1H-pyrrolo[3,2-b]pyridin-2-yl)-1,1,1-trifluoro-N-methylmethanesulfonamide (4i):** According to the General Procedure, **4i** was obtained as a yellow solid (58.7 mg, 90%) from **1i**, **2d** and NaClO. m.p. 98 – 99 °C;  $^1\text{H}$  NMR (400 MHz,  $\text{CDCl}_3$ ):  $\delta$  8.47 (dd,  $J = 4.7, 1.6$  Hz, 1H), 7.94 (dd,  $J = 7.9, 1.6$  Hz, 1H), 7.19 (dd,  $J = 7.9, 4.7$  Hz, 1H), 3.86 (s, 3H), 3.54 (s, 3H);  $^{19}\text{F}$  NMR (376 MHz,  $\text{CDCl}_3$ ):  $\delta$  -74.14;  $^{13}\text{C}$  NMR (100 MHz,  $\text{CDCl}_3$ ):  $\delta$  146.17, 144.24, 128.94, 127.45, 119.83 (q,  $J = 321.3$  Hz), 117.29, 116.95, 102.05, 39.96, 28.74; HRMS (ESI):  $m/z$  calcd for  $\text{C}_{10}\text{H}_9\text{ClF}_3\text{N}_3\text{O}_2\text{S}$   $[\text{M}+\text{H}]^+$  328.0134, found 328.0138.

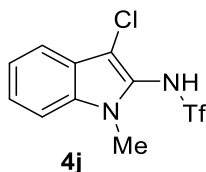

**N-(3-chloro-1-methyl-1H-indol-2-yl)-1,1,1-trifluoromethanesulfonamide (4j):** According to the General Procedure, **4j** was obtained as a brown solid (41.2 mg, 66%) from **1a**, **2j** and NaClO. m.p. 133 – 134 °C;  $^1\text{H}$  NMR (400 MHz,  $\text{DMSO}-d_6$ )  $\delta$  7.86 (dd,  $J = 7.6, 1.2$  Hz, 1H), 7.63 (dd,  $J = 7.8, 1.2$  Hz, 1H), 7.54 – 7.41 (m, 2H), 3.53 (s, 3H);  $^{19}\text{F}$  NMR (376 MHz,  $\text{DMSO}-d_6$ ):  $\delta$  -74.29;  $^{13}\text{C}$  NMR (100 MHz,  $\text{DMSO}-d_6$ ):  $\delta$  164.32, 139.21, 133.12, 130.85, 127.42, 124.61, 119.50 (q,  $J = 316.9$  Hz), 113.24, 76.18, 31.47; IR (neat,  $\text{cm}^{-1}$ ): 1593.14, 1466.81, 1404.57, 1343.79, 1217.81, 1182.53, 1128.65, 1004.04, 866.02; HRMS (ESI):  $m/z$  calcd for  $\text{C}_{10}\text{H}_9\text{ClF}_3\text{N}_2\text{O}_2\text{S}$   $[\text{M}+\text{H}]^+$  313.0025, found 313.0020.

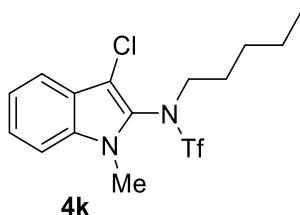

**N-(3-chloro-1-methyl-1H-indol-2-yl)-1,1,1-trifluoro-N-pentylmethanesulfonamide (4k):** According to the General Procedure, **4k** was obtained as a yellow solid (65.4 mg, 91%) from **1a**, **2k** and NaClO. m.p. 49 – 51 °C; <sup>1</sup>H NMR (400 MHz, CDCl<sub>3</sub>): δ 7.64 (d, *J* = 8.0 Hz, 1H), 7.39 – 7.30 (m, 2H), 7.23 (ddd, *J* = 8.0, 6.6, 1.4 Hz, 1H), 3.91 – 3.83 (m, 2H), 3.72 (s, 3H), 1.64 – 1.59 (m, 1H), 1.50 – 1.44 (m, 1H), 1.30 – 1.25 (m, 4H), 0.89 – 0.79 (m, 3H); <sup>19</sup>F NMR (376 MHz, CDCl<sub>3</sub>): δ -74.16; <sup>13</sup>C NMR (100 MHz, CDCl<sub>3</sub>): δ 133.95, 126.60, 124.55, 123.60, 121.01, 119.90 (q, *J* = 321.9 Hz), 118.92, 110.20, 103.80, 53.59, 30.15, 28.60, 28.39, 22.16, 13.84; IR (neat, cm<sup>-1</sup>): 2957.97, 1464.11, 1396.48, 1204.41, 1186.85, 1126.71, 1056.35, 947.97, 811.47, 752.61; HRMS (ESI): *m/z* calcd for C<sub>15</sub>H<sub>19</sub>ClF<sub>3</sub>N<sub>2</sub>O<sub>2</sub>S [M+H]<sup>+</sup> 383.0808, found 383.0803.

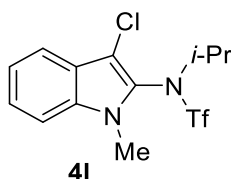

**N-(3-chloro-1-methyl-1H-indol-2-yl)-1,1,1-trifluoro-N-isopropylmethanesulfonamide (4l):** According to the General Procedure, **4l** was obtained as a yellow solid (60.2 mg, 80%) from **1a**, **2l** and NaClO. m.p. 69 – 70 °C; <sup>1</sup>H NMR (400 MHz, CDCl<sub>3</sub>): δ 7.66 (d, *J* = 8.0 Hz, 1H), 7.43 – 7.31 (m, 2H), 7.30 – 7.21 (m, 1H), 4.64 (m, 1H), 3.71 (s, 3H), 1.42 (d, *J* = 6.8 Hz, 3H), 1.28 (d, *J* = 6.7 Hz, 3H); <sup>19</sup>F NMR (376 MHz, CDCl<sub>3</sub>): δ -75.01; <sup>13</sup>C NMR (100 MHz, CDCl<sub>3</sub>): δ 134.47, 124.79, 123.82, 121.03, 119.48 (q, *J* = 321.0 Hz), 119.29, 110.23, 106.70, 96.00, 58.83, 30.77, 22.40, 21.99; IR (thin film, cm<sup>-1</sup>): 1466.81, 1384.18, 1108.23, 1000.82, 967.78, 879.55, 784.83, 746.57; HRMS (ESI): *m/z* calcd for C<sub>13</sub>H<sub>15</sub>ClF<sub>3</sub>N<sub>2</sub>O<sub>2</sub>S [M+H]<sup>+</sup> 355.0495, found 355.0489.

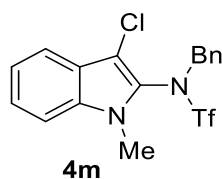

**N-benzyl-N-(3-chloro-1-methyl-1H-indol-2-yl)-1,1,1-trifluoromethanesulfonamide (4m):** According to the General Procedure, **4m** was obtained as a yellow oil (45.8 mg, 59%) from **1a**, **2m** and NaClO. <sup>1</sup>H NMR (400 MHz, CDCl<sub>3</sub>): δ 7.65 (dt, *J* = 8.0, 1.0 Hz, 1H), 7.33 – 7.26 (m, 2H), 7.25 – 7.18 (m, 3H), 7.16 – 7.09 (m, 3H), 5.20 (d, *J* = 13.7 Hz, 1H), 4.77 (d, *J* = 13.7 Hz, 1H), 2.99 (s, 3H); <sup>19</sup>F NMR (376 MHz, CDCl<sub>3</sub>): δ -74.21; <sup>13</sup>C NMR (100 MHz, CDCl<sub>3</sub>): δ 133.73, 133.63, 129.71, 129.20, 128.91, 125.97, 124.38, 123.39, 123.17 (q, *J* = 321.6 Hz), 120.85, 118.83, 110.19, 103.58, 56.66, 29.34; IR (neat, cm<sup>-1</sup>): 1469.52, 1396.69, 1193.27, 1135.6, 1026.27, 968.87, 909.32, 805.48, 742.36, 700.36; HRMS (ESI): *m/z* calcd for C<sub>17</sub>H<sub>15</sub>ClN<sub>2</sub>O<sub>2</sub>S [M+H]<sup>+</sup> 403.0495, found 403.0490.

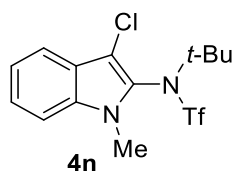

**N-(tert-butyl)-N-(3-chloro-1-methyl-1H-indol-2-yl)-1,1,1-trifluoromethanesulfonamide (4n):** According to the General Procedure, **4n** was obtained as a yellow solid (34.3 mg, 47%) from **1a**, **2n** and NaClO. m.p. 109 – 110 °C; <sup>1</sup>H NMR (400 MHz, CDCl<sub>3</sub>) δ 7.63 (d, *J* = 8.0 Hz, 1H), 7.39 – 7.29 (m, 2H), 7.25 – 7.20 (m, 1H), 3.76 (s, 3H), 1.56 (s, 9H); <sup>19</sup>F NMR (376 MHz, CDCl<sub>3</sub>): δ -73.79; <sup>13</sup>C NMR (100 MHz, CDCl<sub>3</sub>): δ 134.01, 127.39, 124.66, 123.42, 120.98, 119.36 (q, *J* = 322.6 Hz), 119.19, 110.22, 106.58, 70.08, 30.72, 30.54; IR (neat, cm<sup>-1</sup>): 1558.84, 1461.40, 1387.93, 1366.68, 1328.79, 1236.78, 1135.05, 1101.47, 954.78; HRMS (ESI): *m/z* calcd for C<sub>14</sub>H<sub>20</sub>ClF<sub>3</sub>N<sub>3</sub>O<sub>2</sub>S [M+NH<sub>4</sub>]<sup>+</sup> 386.0917, found 380.0911.

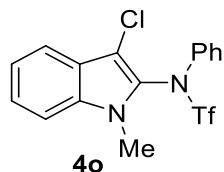

**N-(3-chloro-1-methyl-1H-indol-2-yl)-1,1,1-trifluoro-N-phenylmethanesulfonamide (4o):** According to the General Procedure, **4o** was obtained as a yellow solid (53.5

mg, 69%) from **1a**, **2o** and NaClO. m.p. 115 – 116 °C; <sup>1</sup>H NMR (400 MHz, CDCl<sub>3</sub>): δ 7.70 – 7.66 (m, 2H), 7.64 (d, *J* = 8.1 Hz, 1H), 7.46 – 7.26 (m, 5H), 7.24 – 7.18 (m, 1H), 3.84 (s, 3H); <sup>19</sup>F NMR (376 MHz, CDCl<sub>3</sub>): δ -72.81; <sup>13</sup>C NMR (100 MHz, CDCl<sub>3</sub>): δ 139.28, 133.90, 129.86, 129.22, 128.04, 127.24, 124.90, 123.69, 121.13, 119.85 (*J* = 321.9 Hz), 119.31, 110.17, 104.64, 30.27; IR (neat, cm<sup>-1</sup>): 1588.59, 1483.05, 1393.74, 1342.32, 1190.77, 1128.53, 987.80, 966.15, 933.68; HRMS (ESI): *m/z* calcd for C<sub>16</sub>H<sub>13</sub>ClF<sub>3</sub>N<sub>2</sub>O<sub>2</sub>S [M+H]<sup>+</sup> 389.0338, found 389.0332.

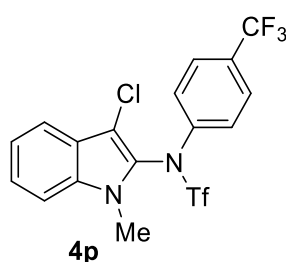

**N-(3-chloro-1-methyl-1H-indol-2-yl)-1,1,1-trifluoro-N-(4-(trifluoromethyl)phenyl)methanesulfonamide (4p):** According to the General Procedure, **4p** was obtained as a white solid (62.3 mg, 71%) from **1a**, **2p** and NaClO. m.p. 112 – 113 °C; <sup>1</sup>H NMR (400 MHz, CDCl<sub>3</sub>): δ 7.77 – 7.61 (m, 5H), 7.42 – 7.31 (m, 2H), 7.28 – 7.21 (m, 1H), 3.82 (s, 3H); <sup>19</sup>F NMR (376 MHz, CDCl<sub>3</sub>): δ -62.85, -72.76; <sup>13</sup>C NMR (100 MHz, CDCl<sub>3</sub>): δ 142.26, 134.05, 130.74 (q, *J* = 33.2 Hz), 127.02 (q, *J* = 3.9 Hz), 126.36, 125.25, 123.58, 123.38 (q, *J* = 270.8 Hz), 121.37, 120.09 (q, *J* = 321.9 Hz), 119.41, 110.25, 105.17, 30.26; IR (neat, cm<sup>-1</sup>): 1612.95, 1466.81, 1406.03, 1321.75, 1220.54, 1200.20, 1166.42, 1128.79, 1110.09, 1069.66, 993.21, 936.38; HRMS (ESI): *m/z* calcd for C<sub>17</sub>H<sub>12</sub>ClF<sub>6</sub>N<sub>2</sub>O<sub>2</sub>S [M+H]<sup>+</sup> 457.0212, found 457.0206.

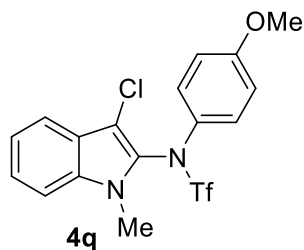

**N-(3-chloro-1-methyl-1H-indol-2-yl)-1,1,1-trifluoro-N-(4-methoxyphenyl)methanesulfonamide (4q):** According to the General Procedure, **4q** was obtained as a white solid (43.9 mg, 52%) from **1a**, **2q** and NaClO. m.p. 140 – 141 °C; <sup>1</sup>H NMR (400 MHz, CDCl<sub>3</sub>): δ 7.71 – 7.62 (m, 3H), 7.37 – 7.33 (m, 1H), 7.33 – 7.29 (m, 1H), 7.25 – 7.19 (m, 1H), 6.95 – 6.88 (m, 2H), 3.87 (s, 3H), 3.80 (s, 3H); <sup>19</sup>F NMR (376 MHz, CDCl<sub>3</sub>): δ -72.79; <sup>13</sup>C NMR (100 MHz, CDCl<sub>3</sub>): δ 160.08, 137.81, 131.75, 129.28, 128.49, 124.76, 123.68, 121.04, 119.86 (q, *J* = 322.2 Hz), 119.24, 114.88, 110.10, 104.18, 55.56, 30.22; IR (neat, cm<sup>-1</sup>): 2960.75, 1468.06, 1396.81, 1221.99, 1203.21, 1126.54, 1055.97, 968.01, 947.65; HRMS (ESI): *m/z* calcd for C<sub>17</sub>H<sub>15</sub>ClN<sub>2</sub>O<sub>3</sub>S [M+H]<sup>+</sup> 419.0444, found 419.0437.

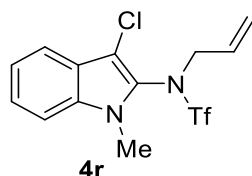

**N-allyl-N-(3-chloro-1-methyl-1H-indol-2-yl)-1,1,1-trifluoromethanesulfonamide (4r):** According to the General Procedure, **4r** was obtained as a yellow liquid (59.2 mg, 84%) from **1a**, **2r** and NaClO. <sup>1</sup>H NMR (400 MHz, CDCl<sub>3</sub>): δ 7.63 (dt, *J* = 8.1, 1.0 Hz, 1H), 7.38 – 7.27 (m, 2H), 7.27 – 7.18 (m, 1H), 5.93 – 5.76 (m, 1H), 5.20 – 5.17 (m, 1H), 5.16 – 5.12 (m, 1H), 4.61 – 4.51 (m, 1H), 4.34 (dd, *J* = 14.1, 8.3 Hz, 1H), 3.68 (s, 3H); <sup>19</sup>F NMR (376 MHz, CDCl<sub>3</sub>): δ -74.30; <sup>13</sup>C NMR (100 MHz, CDCl<sub>3</sub>): δ 133.95, 130.26, 126.20, 124.54, 123.47, 122.58, 120.95, 119.84 (q, *J* = 321.6 Hz), 118.94, 110.22, 103.99, 55.94, 30.19; IR (neat, cm<sup>-1</sup>): 1469.52, 1398.00, 1331.50, 1188.31, 1129.36, 1041.93, 966.15, 928.26, 893.08, 746.56; HRMS (ESI): *m/z* calcd for C<sub>13</sub>H<sub>13</sub>ClF<sub>3</sub>N<sub>2</sub>O<sub>4</sub>S [M+H]<sup>+</sup> 353.0338, found 353.0333.

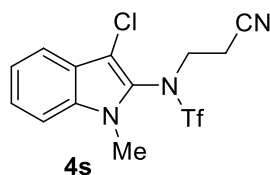



**N-(3-chloro-1-methyl-1H-indol-2-yl)-N-(2-cyanoethyl)-1,1,1-trifluoromethanesulfonamide (4s):** According to the General Procedure, **4s** was obtained as a white solid (67.8 mg, 92%) from **1a**, **2s** and NaClO. m.p. 65 – 66 °C; <sup>1</sup>H NMR (400 MHz, CDCl<sub>3</sub>): δ 7.63 (dt, *J* = 8.2, 1.0 Hz, 1H), 7.42 – 7.32 (m, 2H), 7.28 – 7.22 (m, 1H), 4.26 – 4.09 (m, 2H), 3.76 (s, 3H), 2.76 – 2.62 (m, 1H), 2.61 – 2.50 (m, 1H). <sup>19</sup>F NMR (376 MHz, CDCl<sub>3</sub>): δ -73.70; <sup>13</sup>C NMR (100 MHz, CDCl<sub>3</sub>): δ 134.29, 125.23, 124.92, 123.37, 121.48, 119.78 (q, *J* = 321.8 Hz), 119.02, 115.99, 110.51, 104.27, 48.87, 30.51, 17.91; IR (neat, cm<sup>-1</sup>): 1466.81, 1399.75, 1346.62, 1282.79, 1224.91, 1193.60, 1138.55, 1087.31, 1048.10, 968.86, 940.61; HRMS (ESI): *m/z* calcd for C<sub>13</sub>H<sub>12</sub>ClF<sub>3</sub>N<sub>3</sub>O<sub>2</sub>S [M+H]<sup>+</sup> 366.0291, found 366.0286.

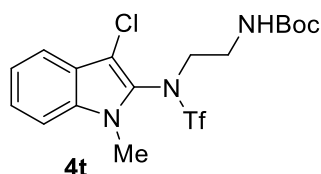

**Tert-butyl(2-((N-(3-chloro-1-methyl-1H-indol-2-yl)-1,1,1-trifluoromethyl)sulfonamido)ethyl)carbamate (4t):** According to the General Procedure, **4t** was obtained as a white solid (84.0 mg, 93%) from **1a**, **2t** and NaClO. m.p. 119 – 120 °C; <sup>1</sup>H NMR (400 MHz, CDCl<sub>3</sub>): δ 7.62 (d, *J* = 8.0 Hz, 1H), 7.41 – 7.27 (m, 2H), 7.23 (ddd, *J* = 8.0, 6.9, 1.2 Hz, 1H), 4.83 (brs, 1H), 4.00 (dq, *J* = 20.5, 7.3, 6.4 Hz, 2H), 3.71 (s, 3H), 3.34 – 3.26 (m, 1H), 3.24 – 3.17 (m, 1H), 1.36 (s, 9H); <sup>19</sup>F NMR (376 MHz, CDCl<sub>3</sub>): δ -73.99; <sup>13</sup>C NMR (100 MHz, CDCl<sub>3</sub>): δ 155.63, 134.08, 126.02, 124.81, 123.48, 121.19, 119.83 (q, *J* = 321.9 Hz), 118.95, 110.26, 79.99, 52.28, 39.39, 30.04, 28.21; IR (neat, cm<sup>-1</sup>): 1684.22, 1522.31, 1465.43, 1396.75, 1320.51, 1286.11, 1224.03, 1185.55, 1118.67, 1058.99; HRMS (ESI): *m/z* calcd for C<sub>17</sub>H<sub>22</sub>ClF<sub>3</sub>N<sub>3</sub>O<sub>4</sub>S [M+H]<sup>+</sup> 456.0972, found 456.0967.

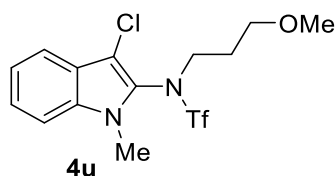

**N-(3-chloro-1-methyl-1H-indol-2-yl)-1,1,1-trifluoro-N-(3-methoxypropyl)methanesulfonamide (4u):** According to the General Procedure, **4u** was obtained as yellow liquid (71.7 mg, 93%) from **1a**, **2u** and NaClO.  $^1\text{H}$  NMR (400 MHz,  $\text{CDCl}_3$ ):  $\delta$  7.63 (d,  $J$  = 8.0 Hz, 1H), 7.40 – 7.29 (m, 2H), 7.26 – 7.20 (m, 1H), 4.09 – 3.86 (m, 2H), 3.72 (s, 3H), 3.42 – 3.32 (m, 2H), 3.27 (s, 3H), 1.96 – 1.83 (m, 1H), 1.83 – 1.68 (m, 1H);  $^{19}\text{F}$  NMR (376 MHz,  $\text{CDCl}_3$ ):  $\delta$  -74.21;  $^{13}\text{C}$  NMR (100 MHz,  $\text{CDCl}_3$ ):  $\delta$  134.00, 126.39, 124.66, 123.59, 121.08, 119.87 (q,  $J$  = 321.8 Hz), 118.96, 110.19, 104.08, 69.10, 58.71, 51.34, 30.10, 29.18; IR (neat,  $\text{cm}^{-1}$ ): 1464.11, 1396.61, 1189.01, 1119.80, 1044.63, 967.96, 879.55, 811.89, 742.97; HRMS (ESI):  $m/z$  calcd for  $\text{C}_{14}\text{H}_{17}\text{ClF}_3\text{N}_2\text{O}_3\text{S}$   $[\text{M}+\text{H}]^+$  385.0601, found 385.0595.

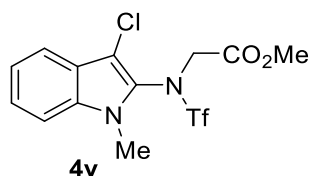

## Methyl

**N-(3-chloro-1-methyl-1H-indol-2-yl)-N-((trifluoromethyl)sulfonyl)glycinate (4v):** According to the General Procedure, **4v** was obtained as a white solid (63.7 mg, 83%) from **1a**, **2v** and NaClO. m.p. 95-96 °C;  $^1\text{H}$  NMR (400 MHz,  $\text{CDCl}_3$ ):  $\delta$  7.62 (dt,  $J$  = 8.1, 1.0 Hz, 1H), 7.40 – 7.33 (m, 2H), 7.25 – 7.19 (m, 1H), 4.81 (d,  $J$  = 18.2, 1H), 4.52 (d,  $J$  = 18.2 Hz, 1H), 3.96 (s, 3H), 3.73 (s, 3H);  $^{19}\text{F}$  NMR (376 MHz,  $\text{CDCl}_3$ ):  $\delta$  -73.76;  $^{13}\text{C}$  NMR (100 MHz,  $\text{CDCl}_3$ ):  $\delta$  167.66, 134.12, 126.93, 124.71, 123.14, 121.04, 119.87 (q,  $J$  = 322.1 Hz), 118.73, 110.49, 102.54, 53.09, 52.84, 30.95; IR (neat,  $\text{cm}^{-1}$ ): 1752.12, 1548.00, 1474.93, 1418.10, 1307.14, 1208.67, 1189.96, 1140.00, 1095.11, 971.56, 807.72, 747.14; HRMS (ESI):  $m/z$  calcd for  $\text{C}_{13}\text{H}_{13}\text{ClF}_3\text{N}_2\text{O}_4\text{S}$   $[\text{M}+\text{H}]^+$  385.0237, found 385.0232

## 6. NMR Spectra for All Compounds

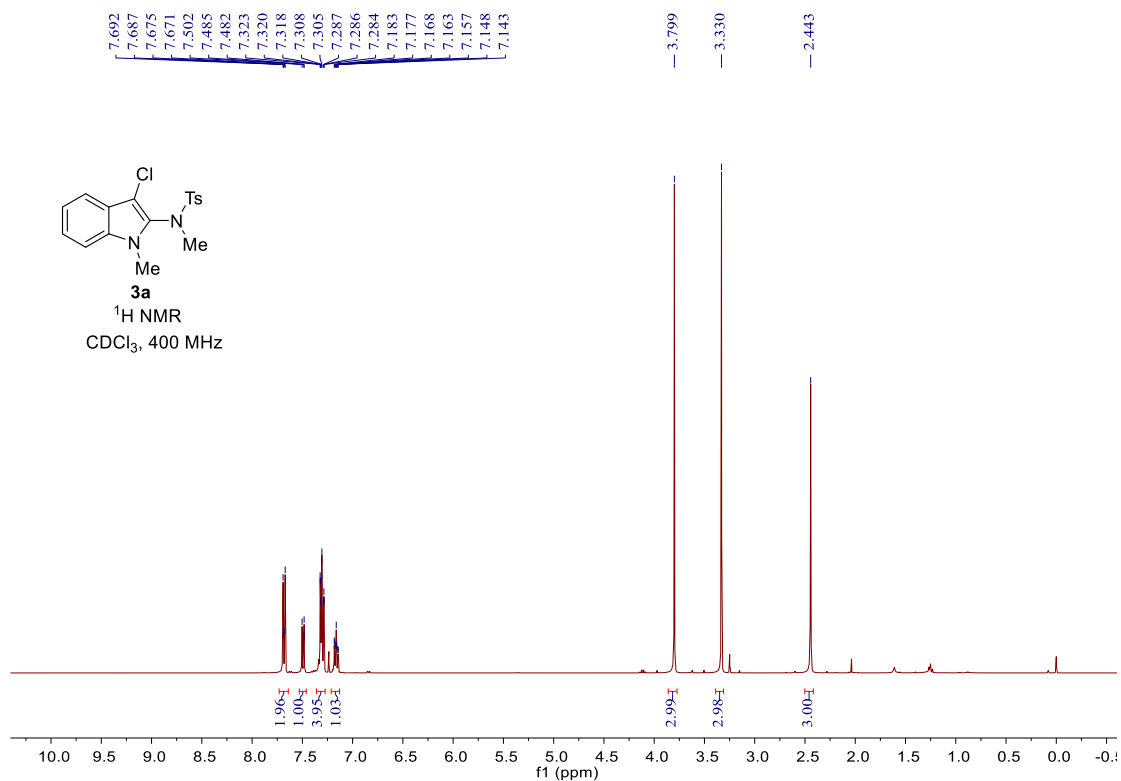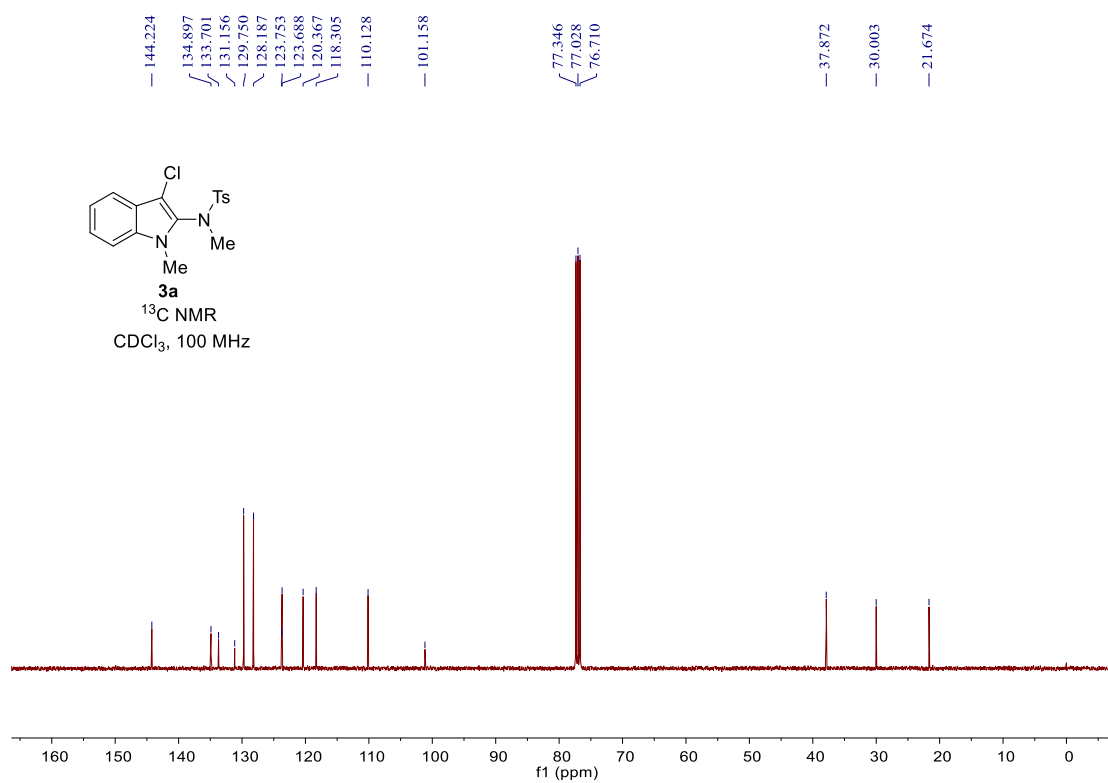

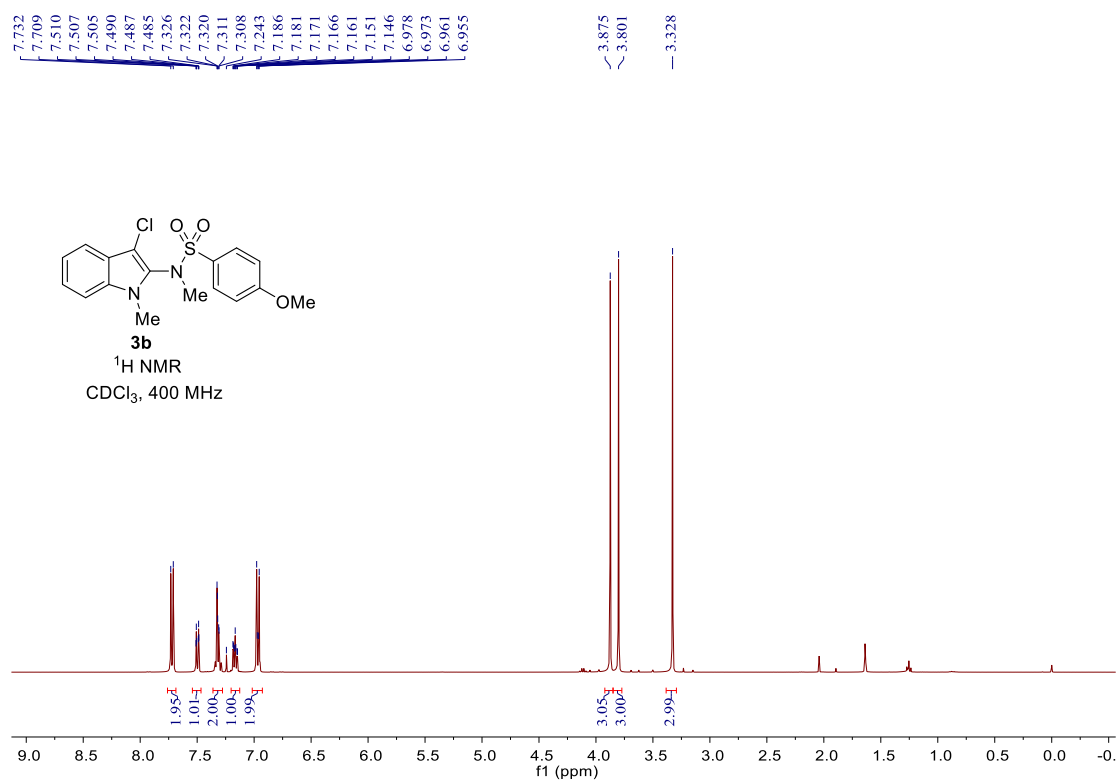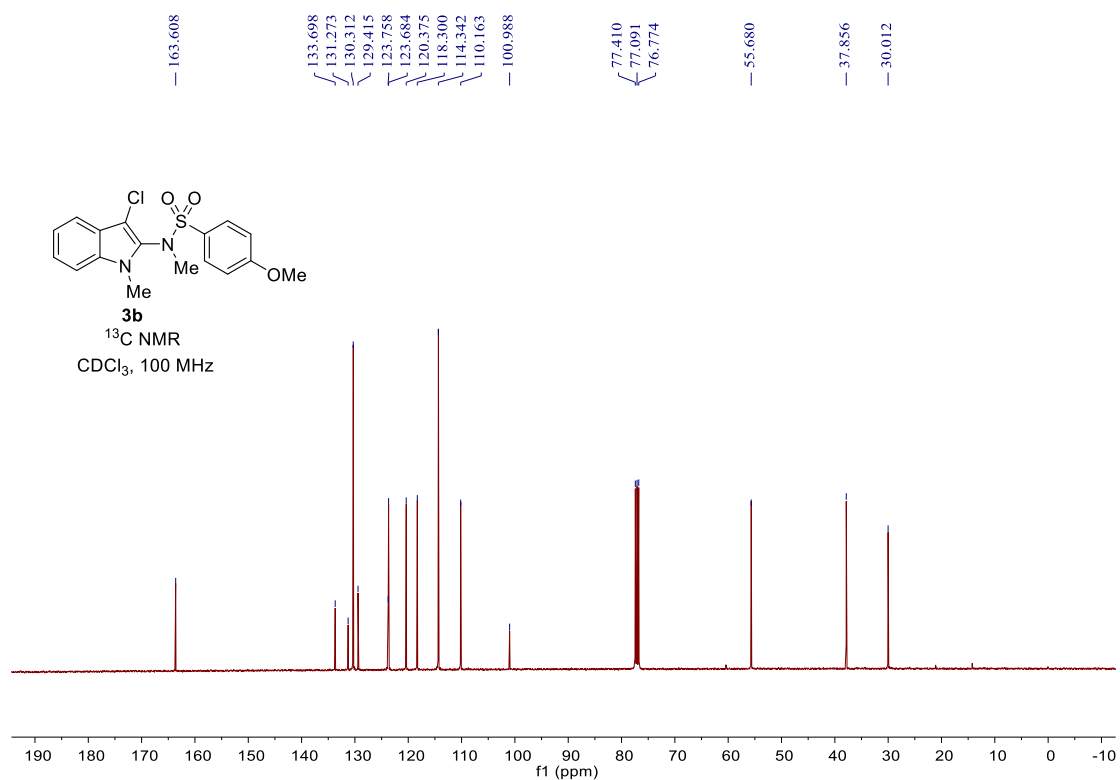

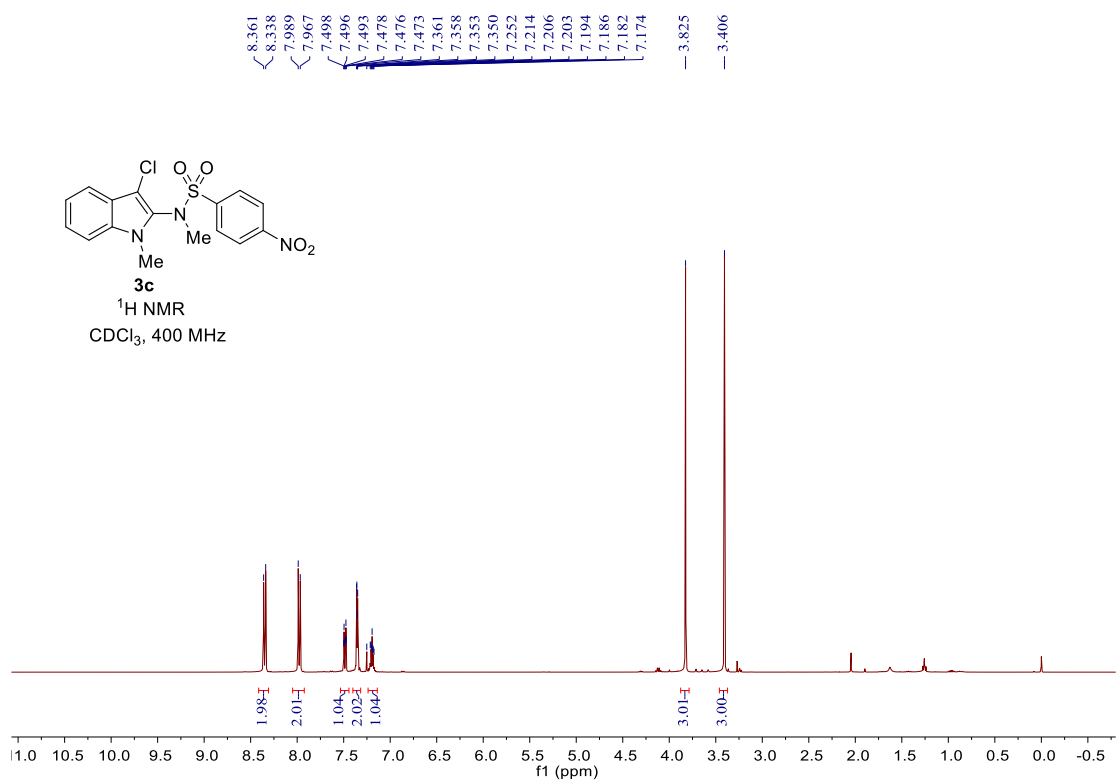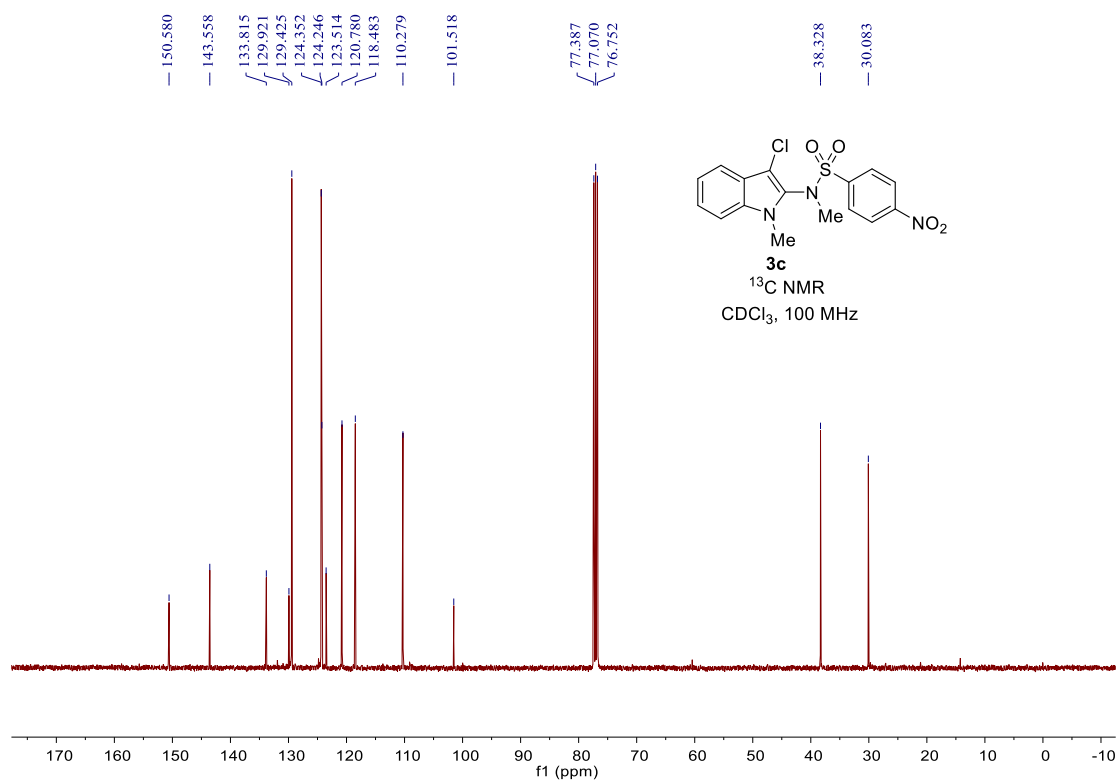

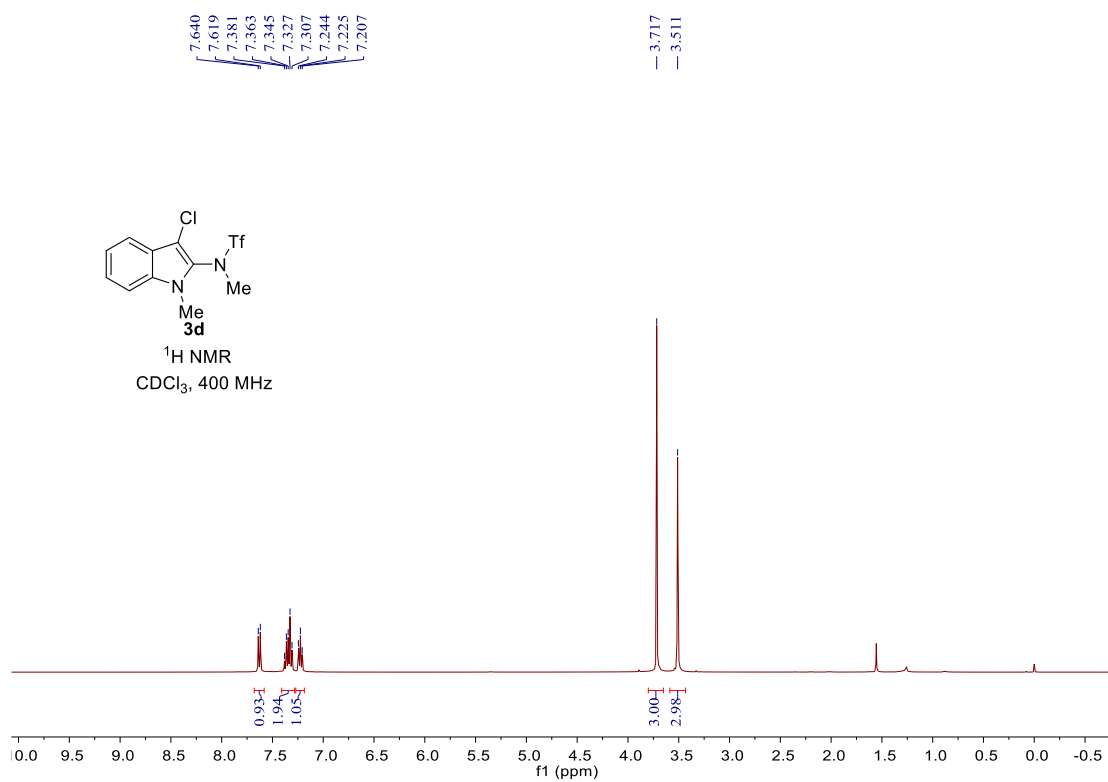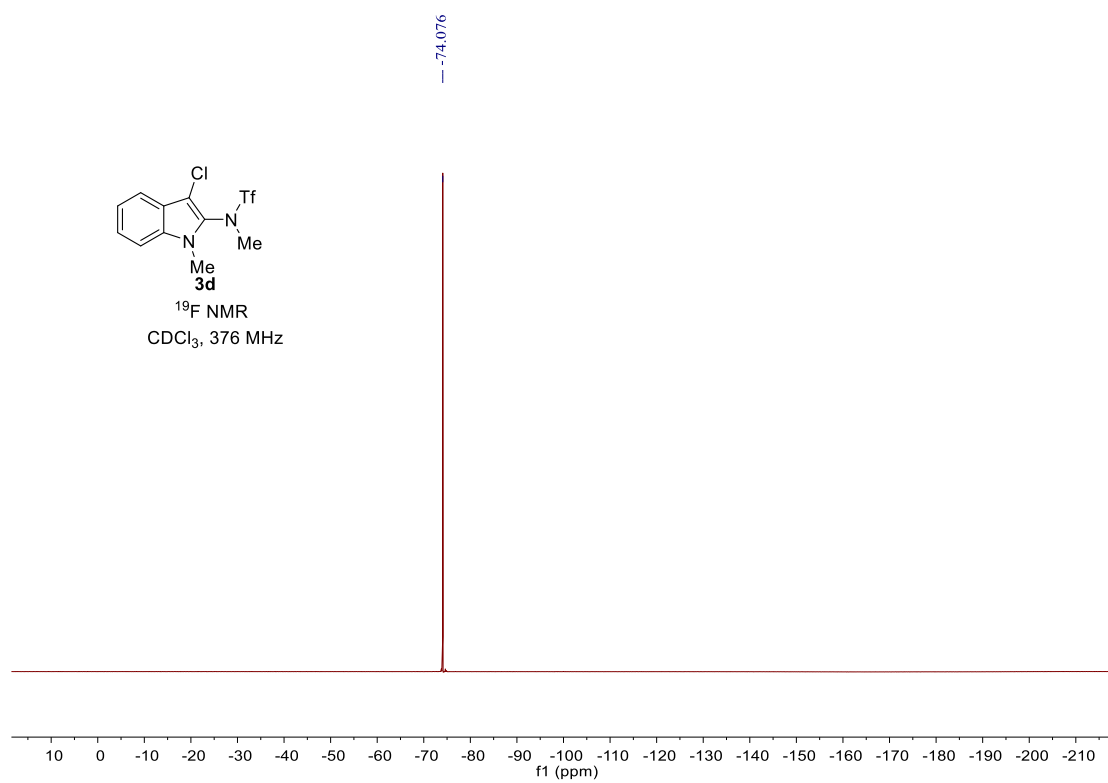

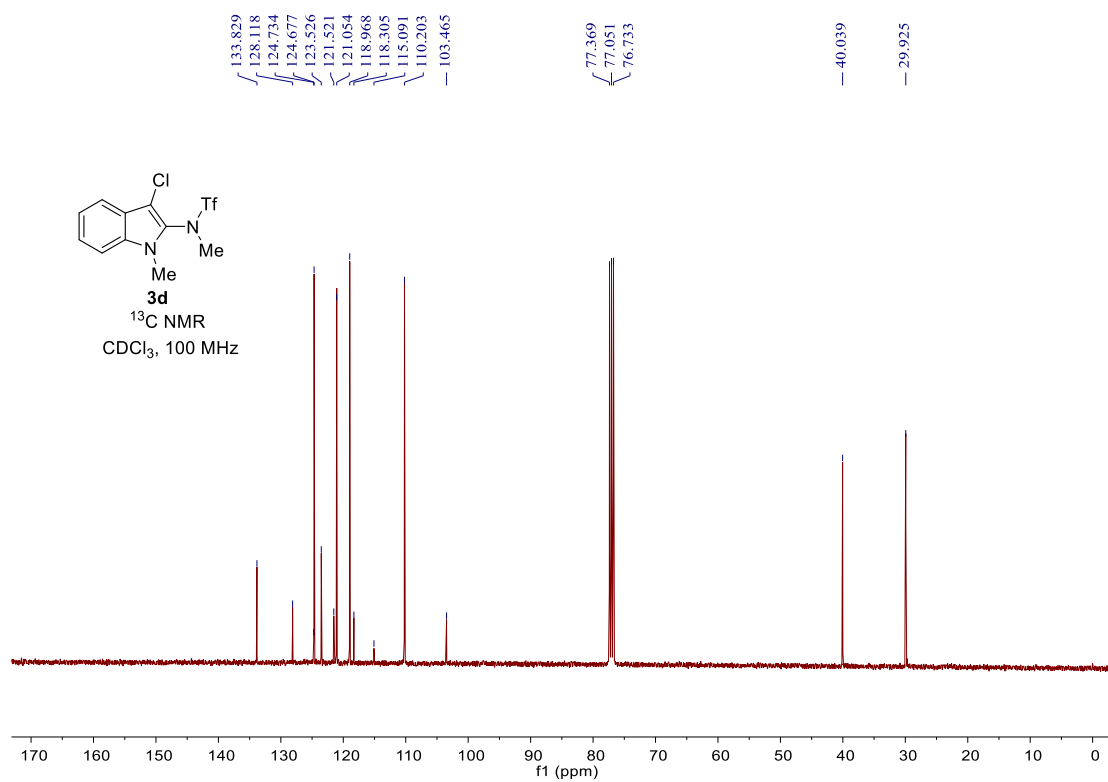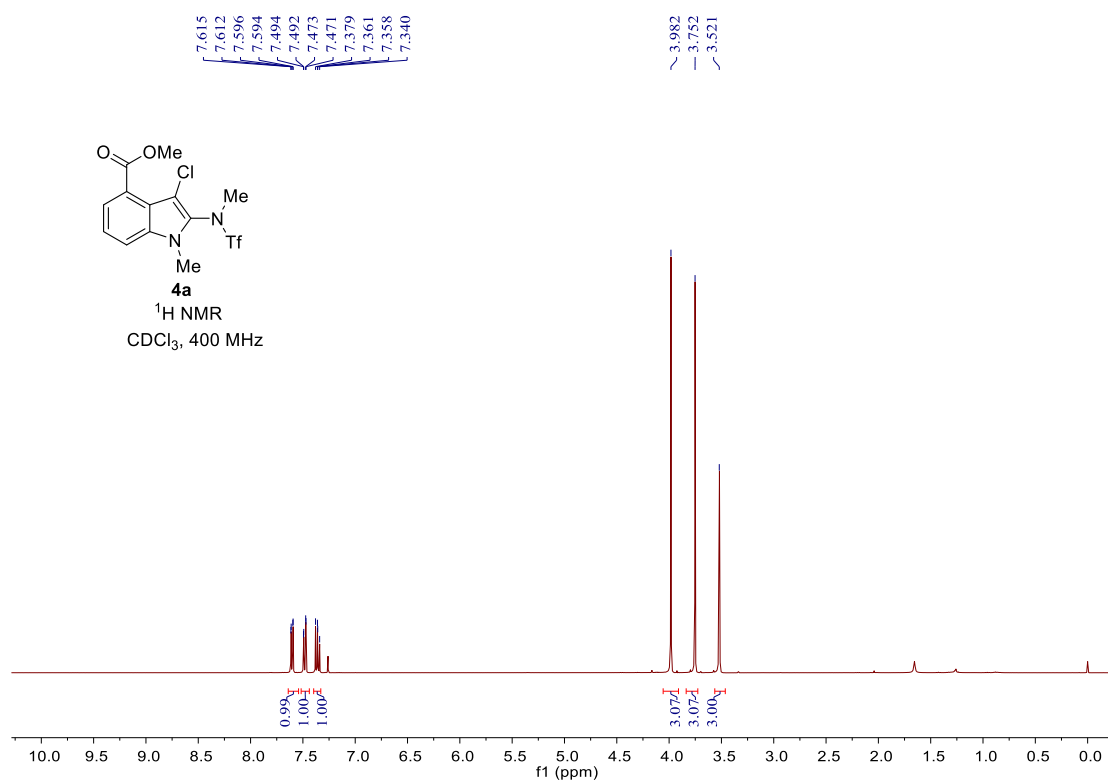

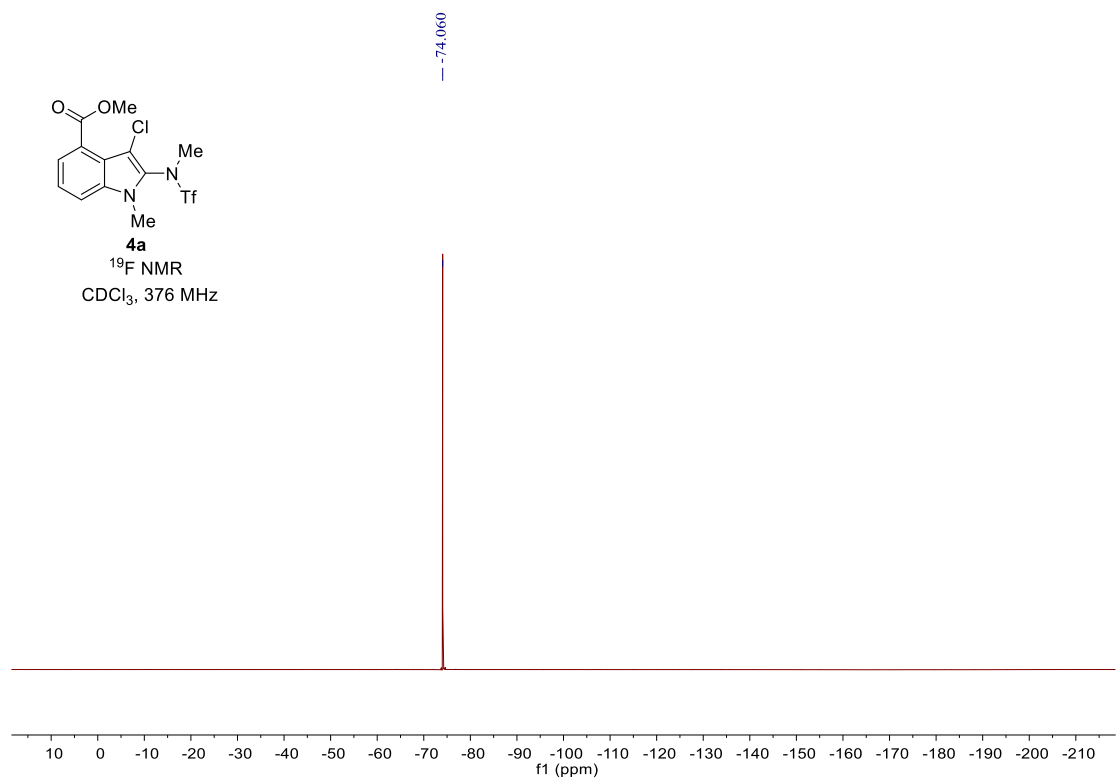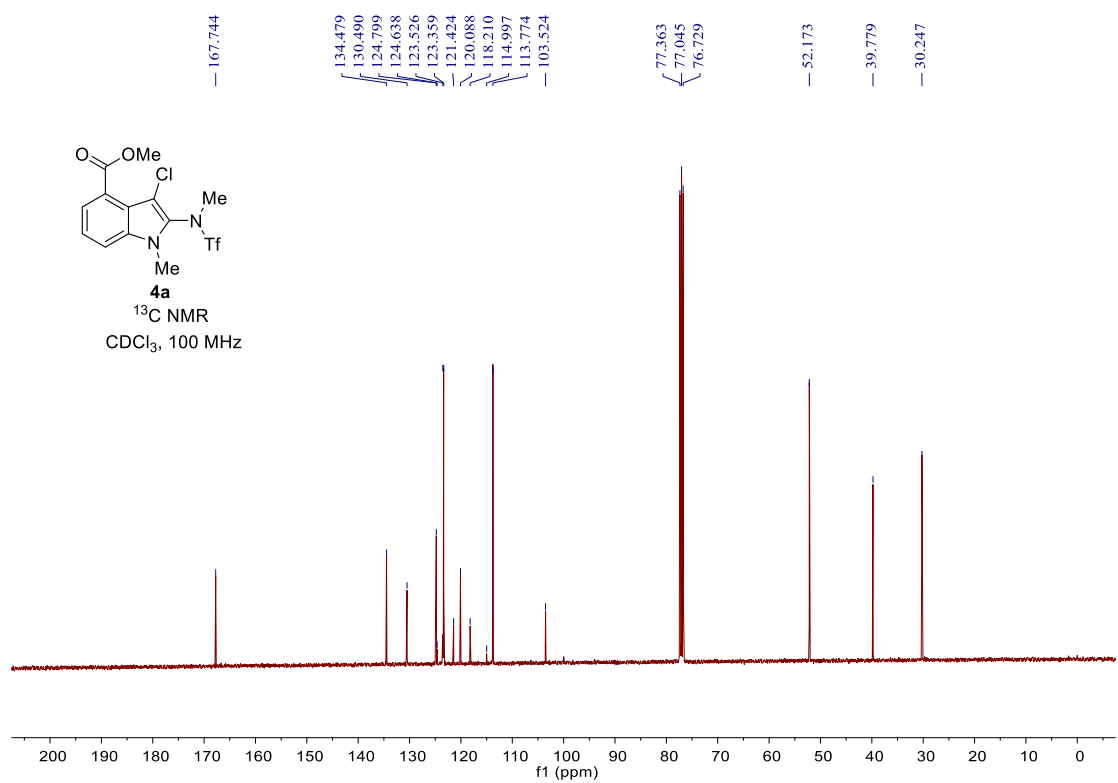



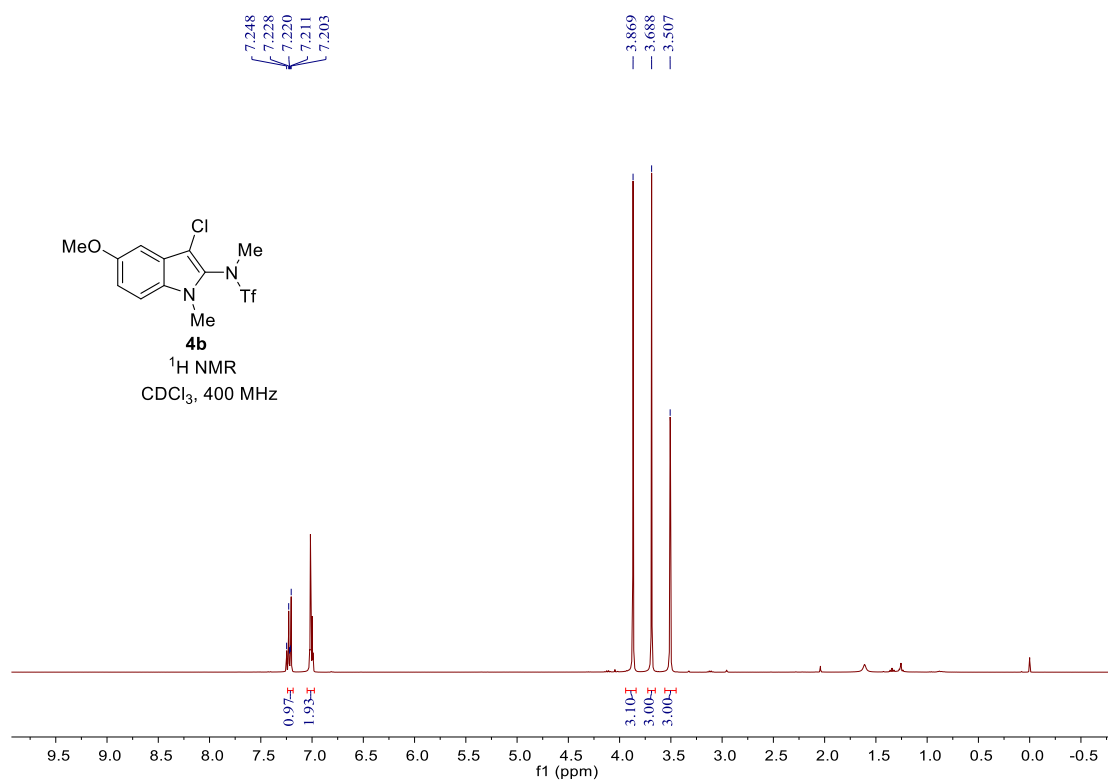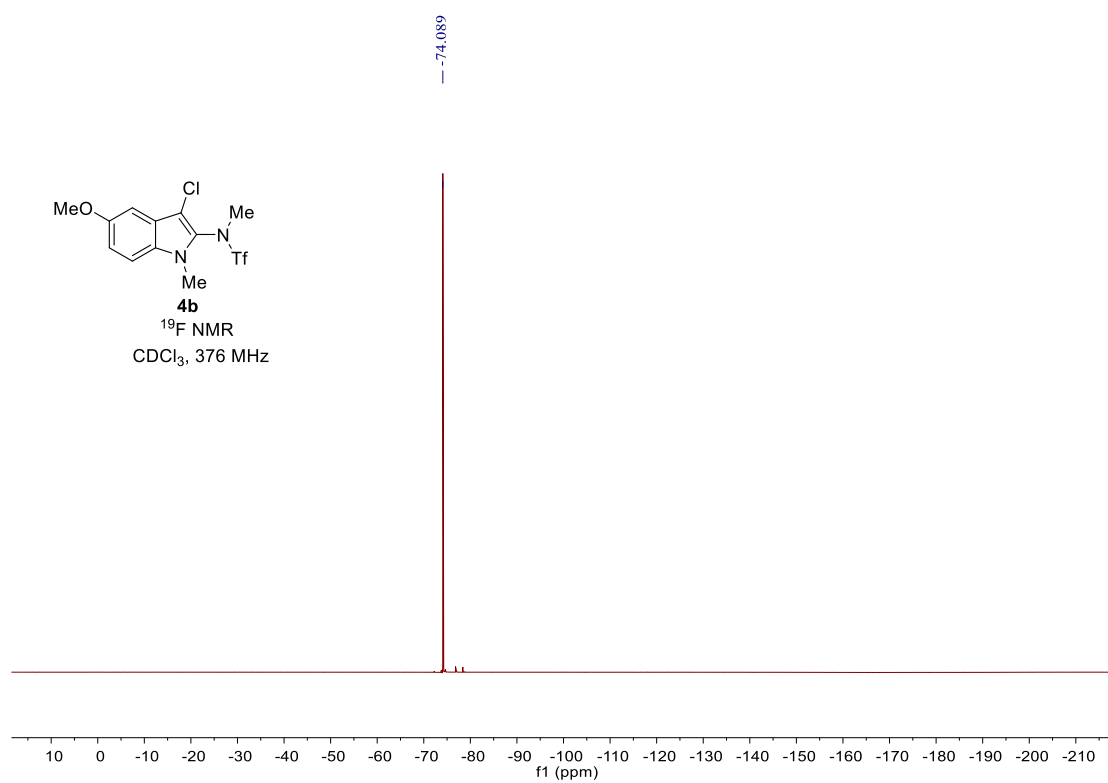

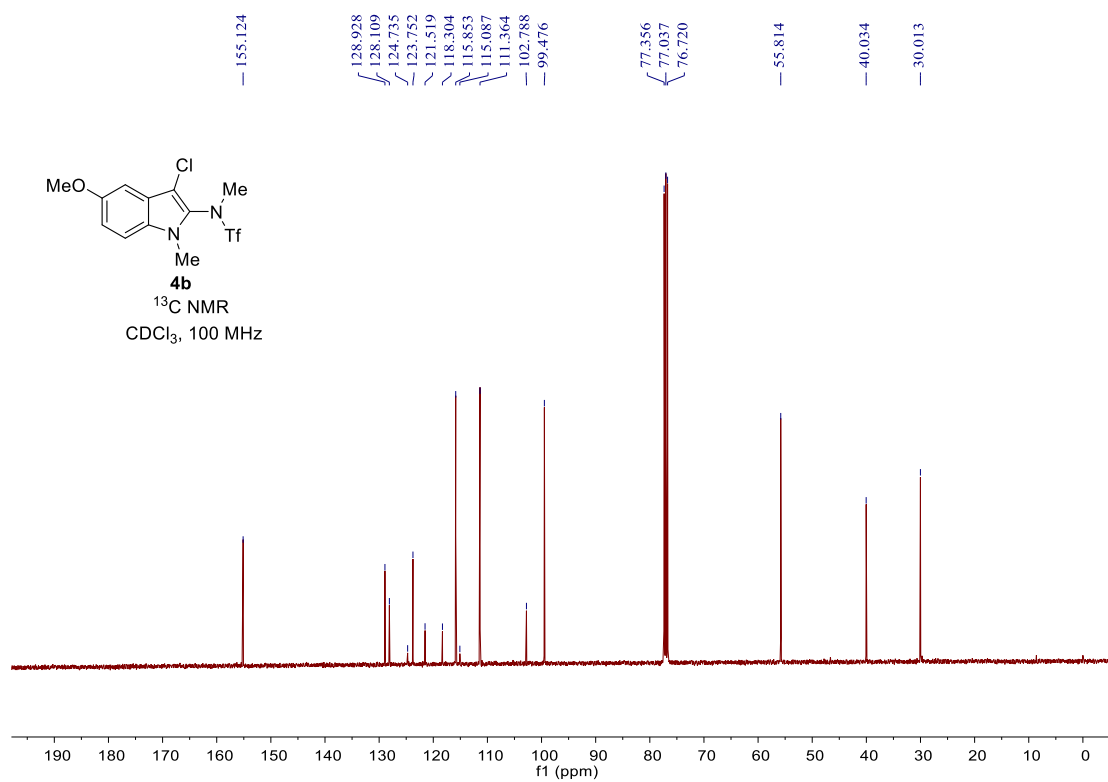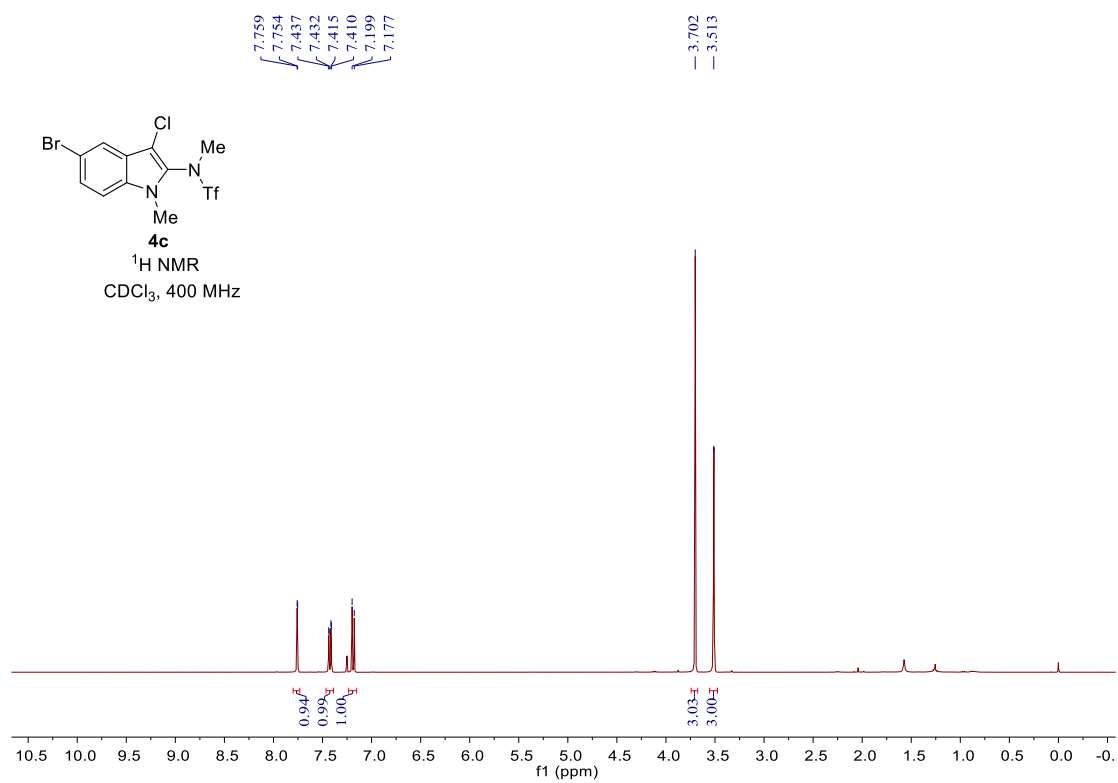

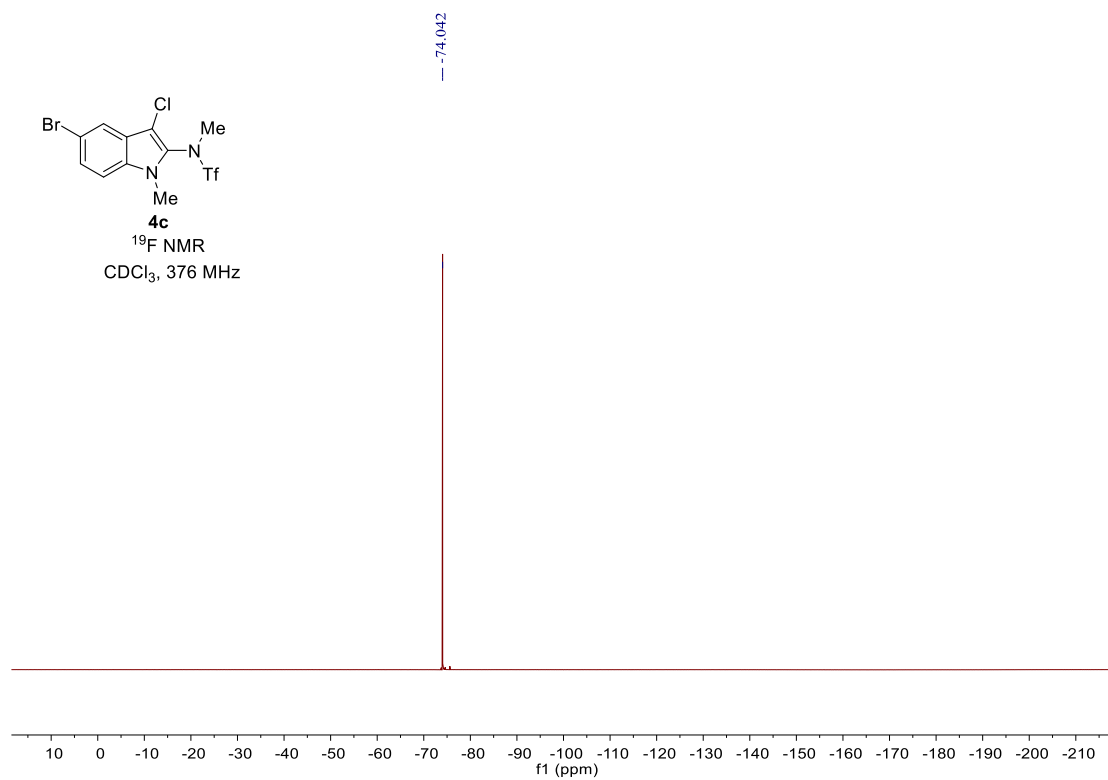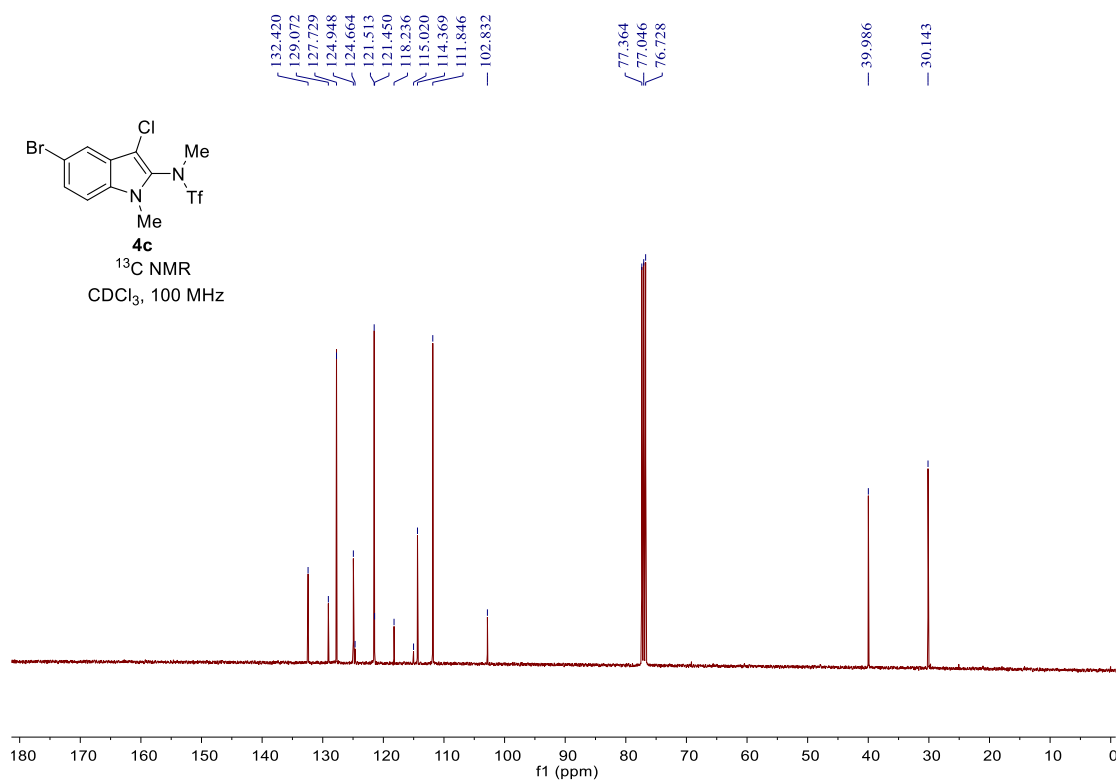

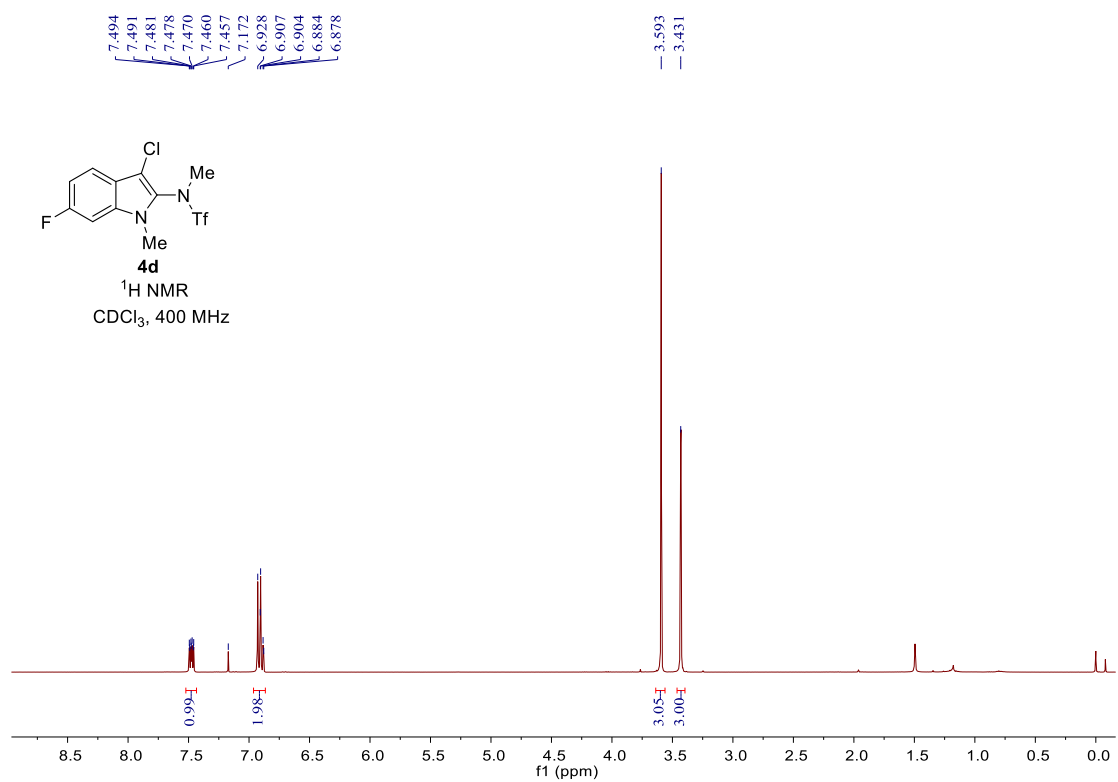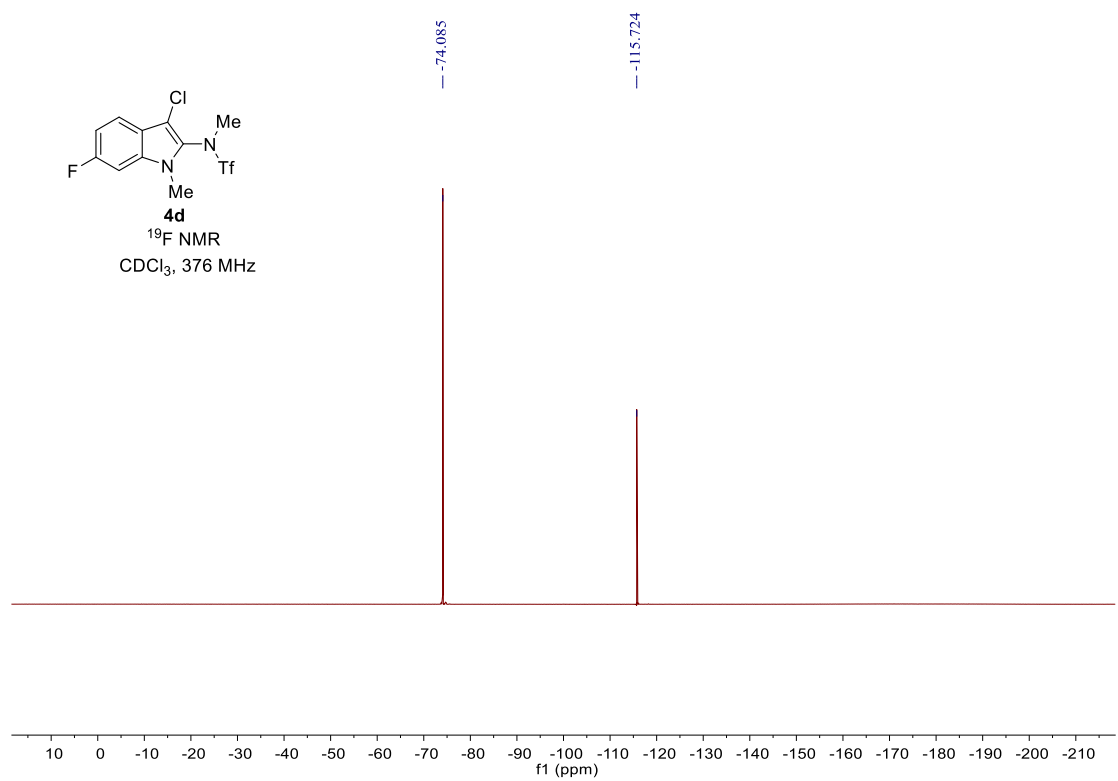

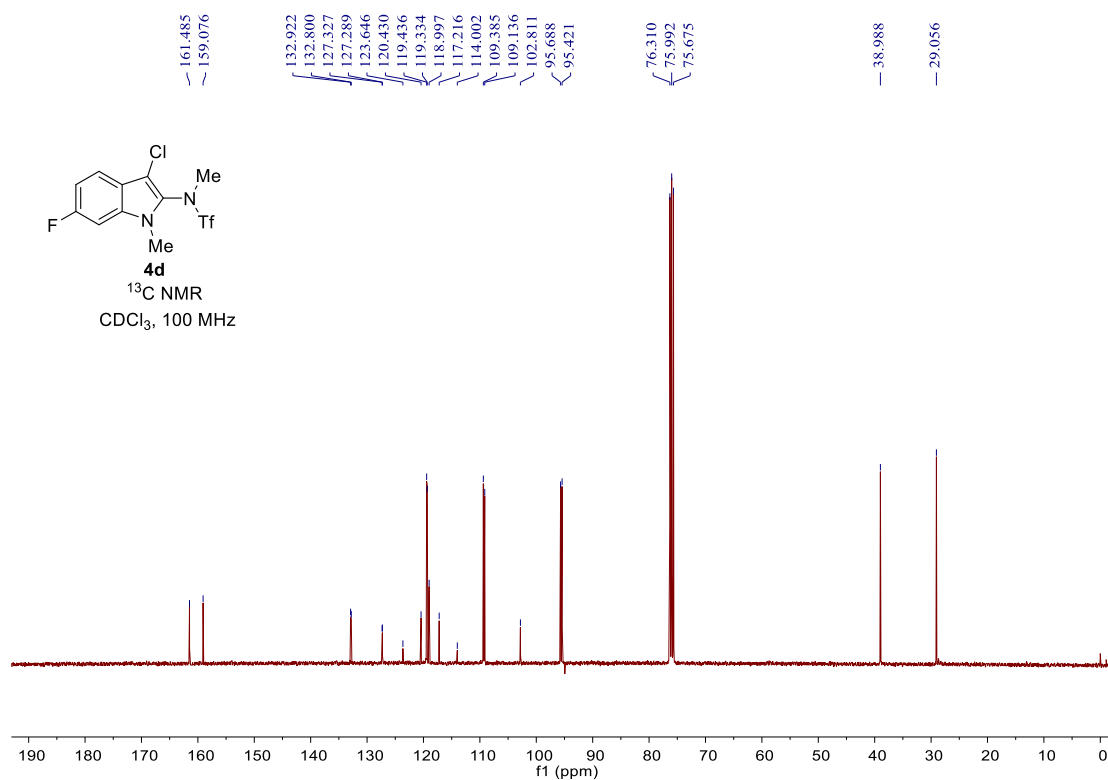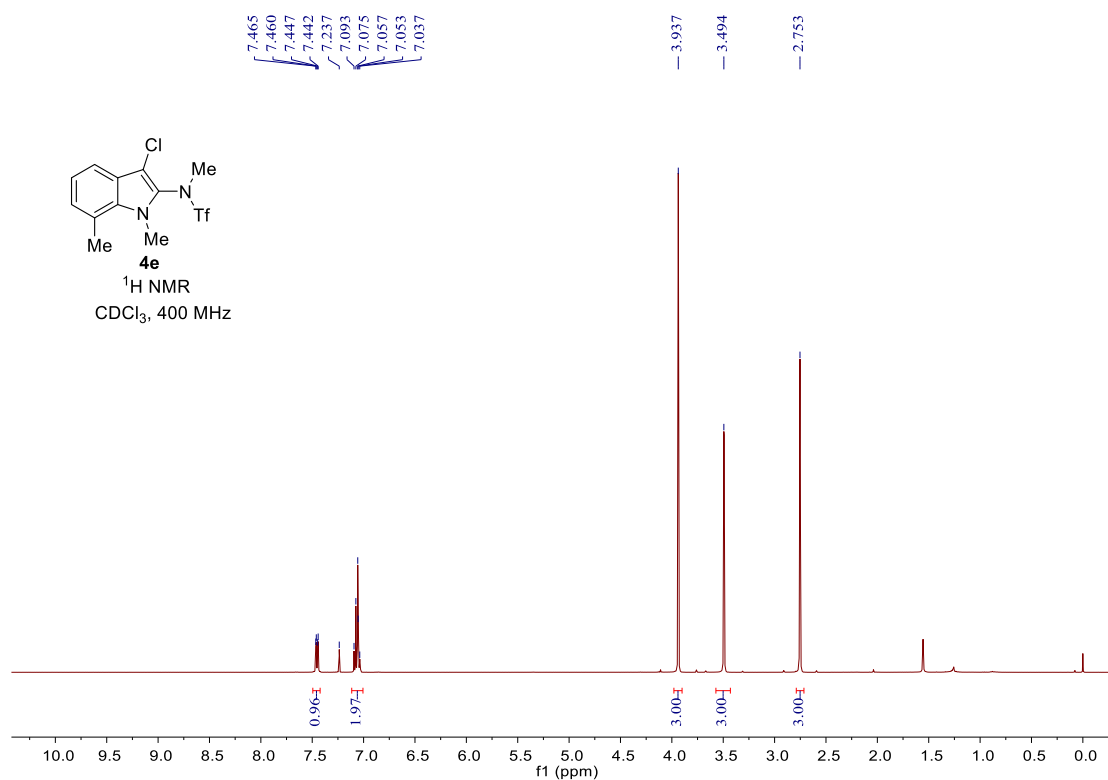

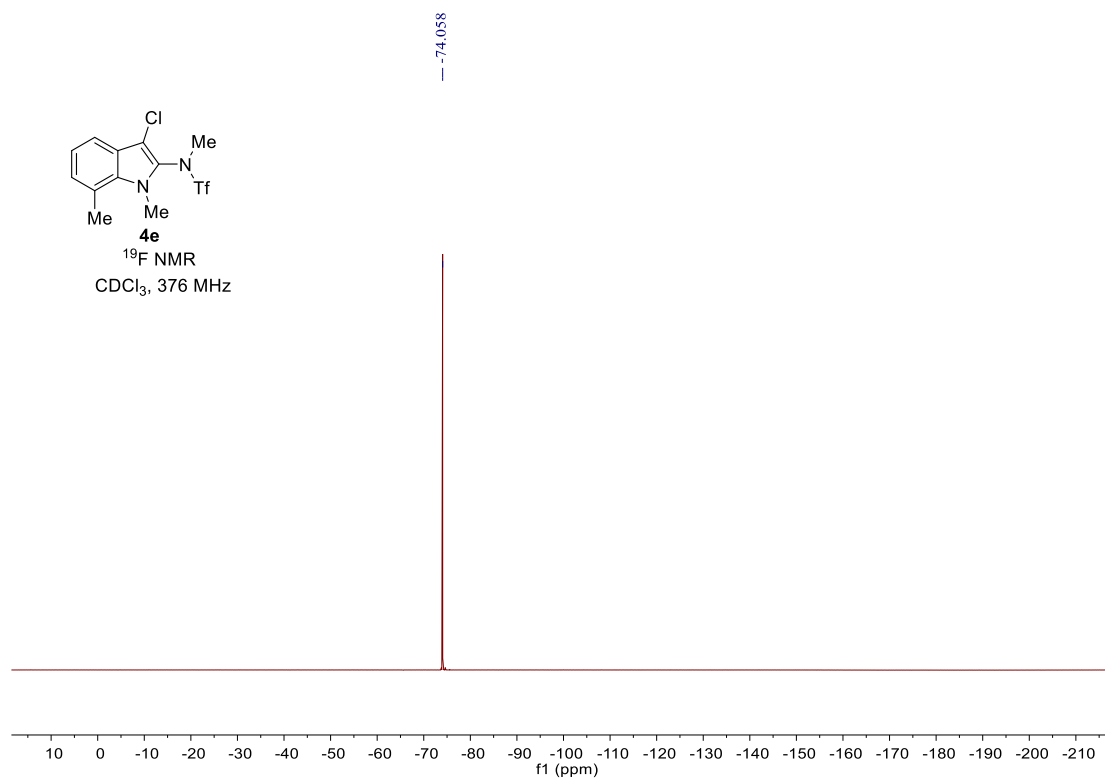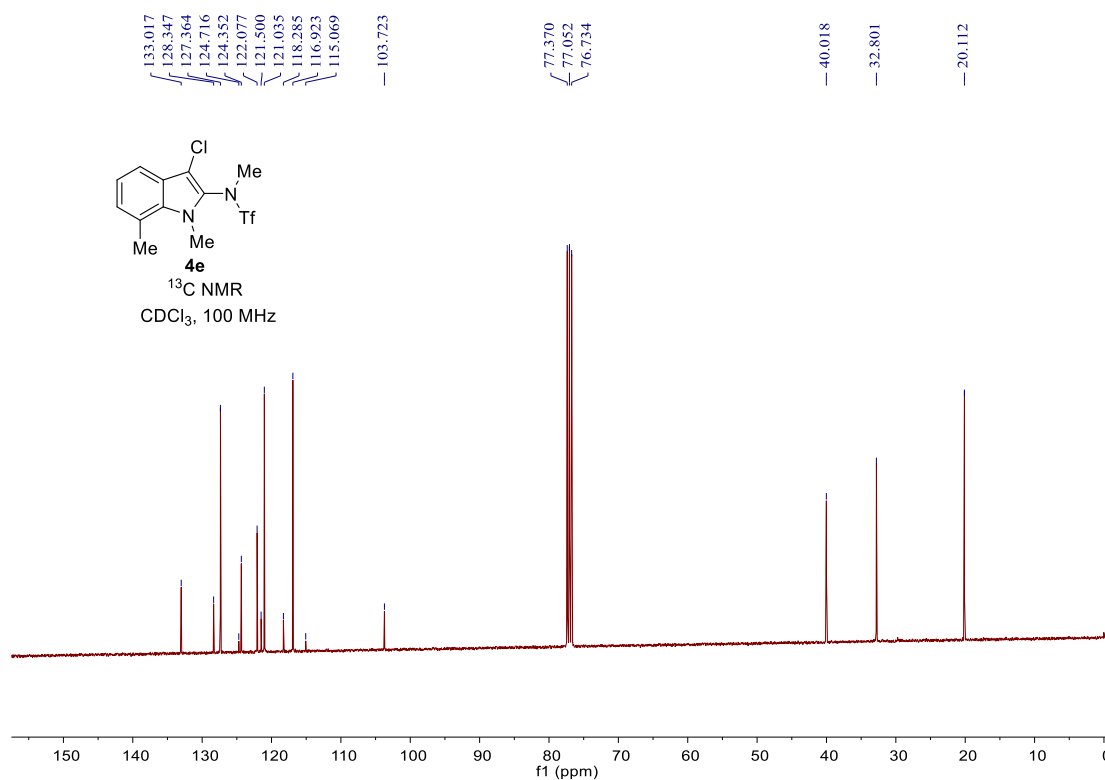

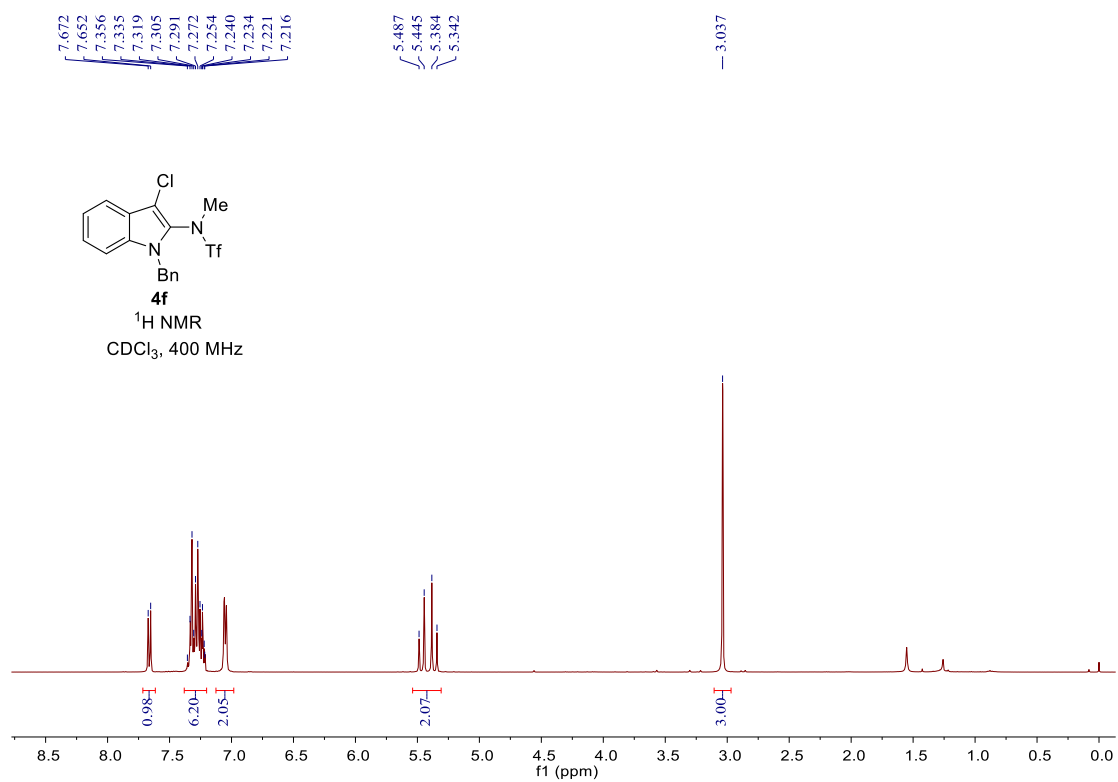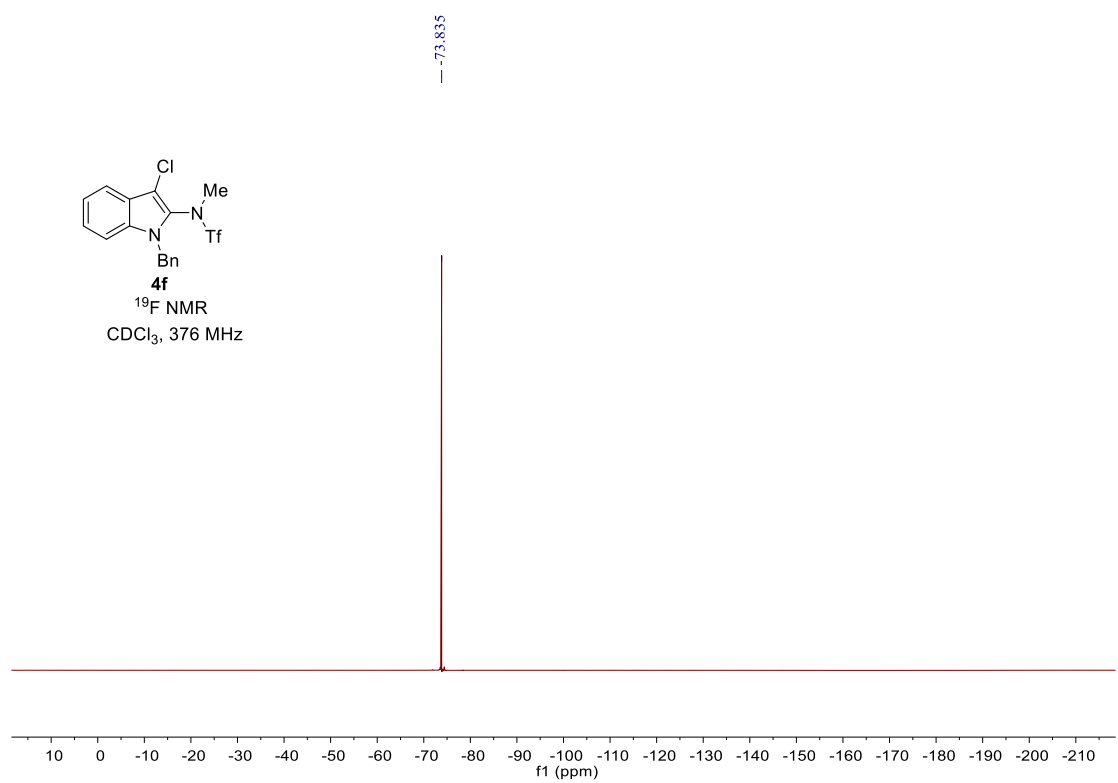

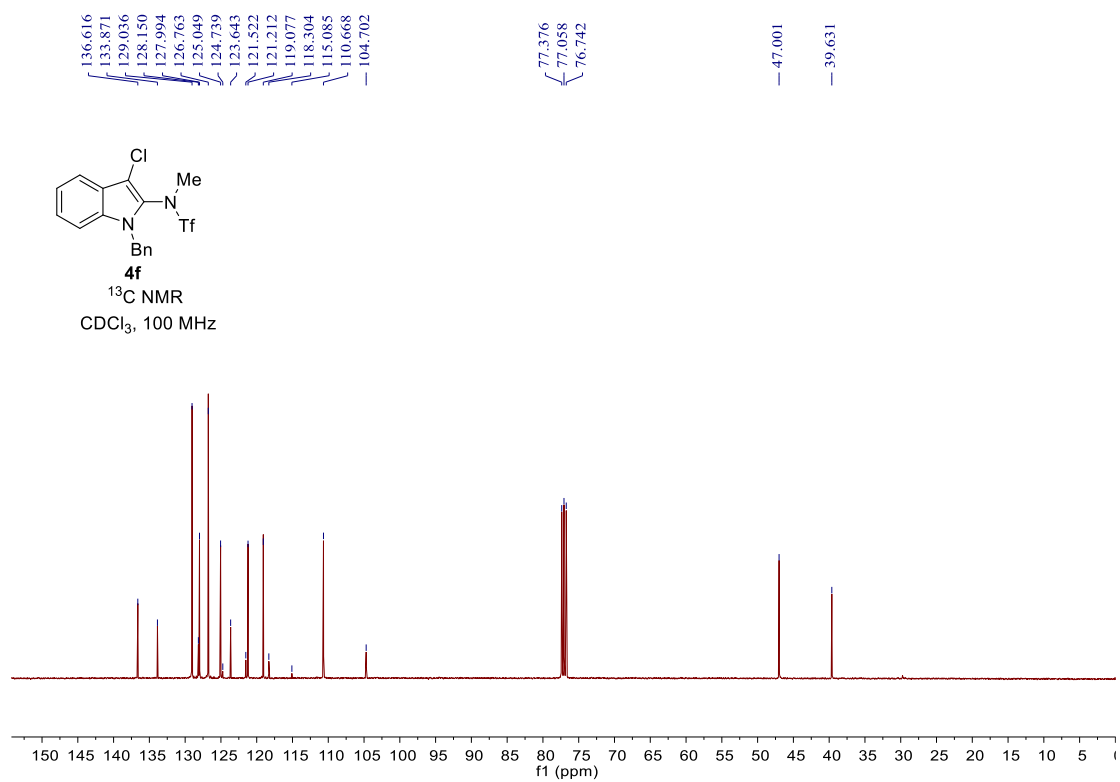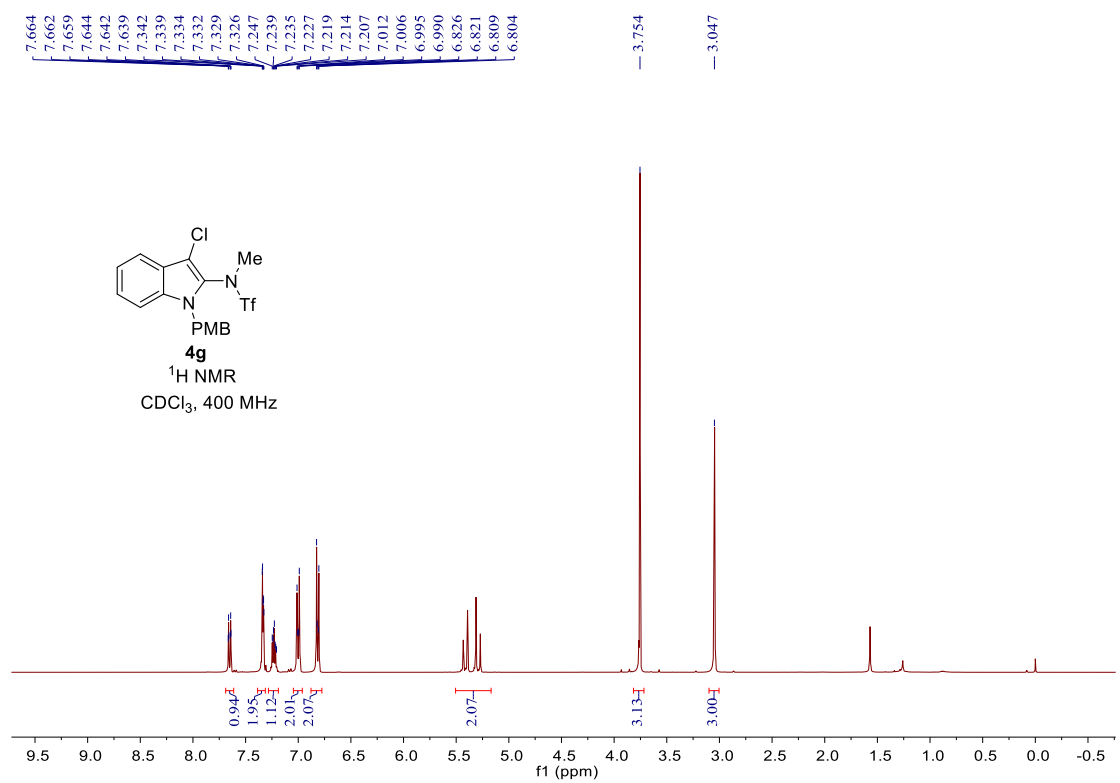



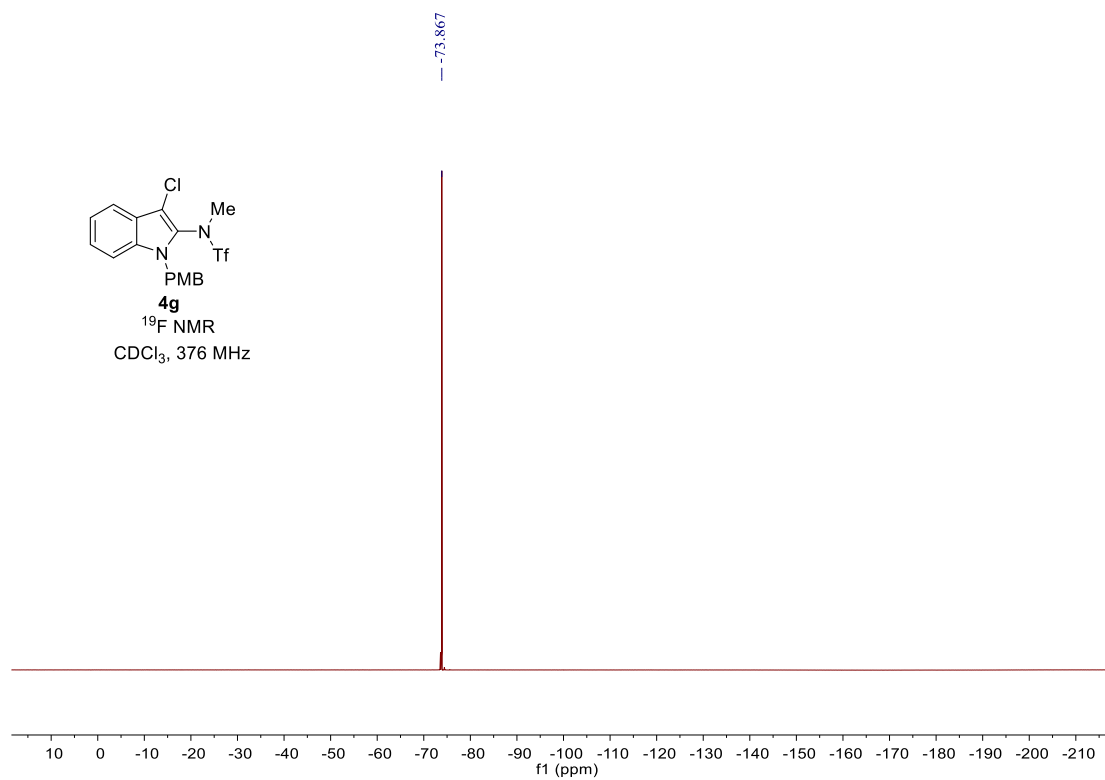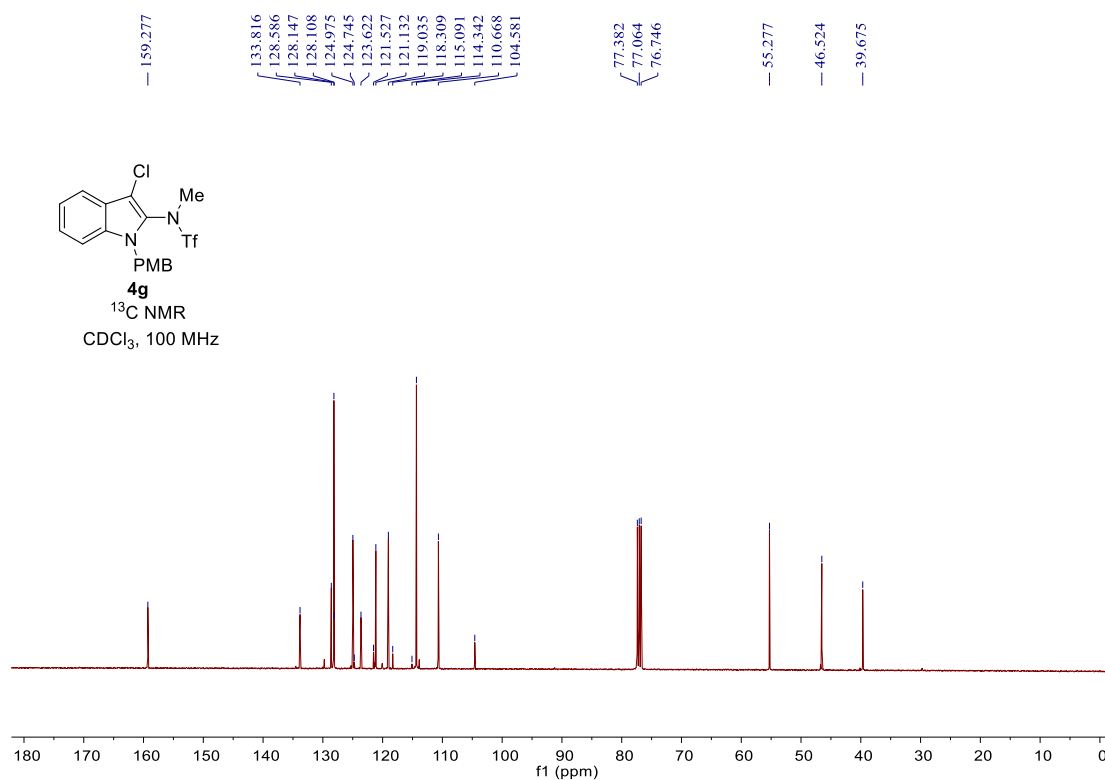

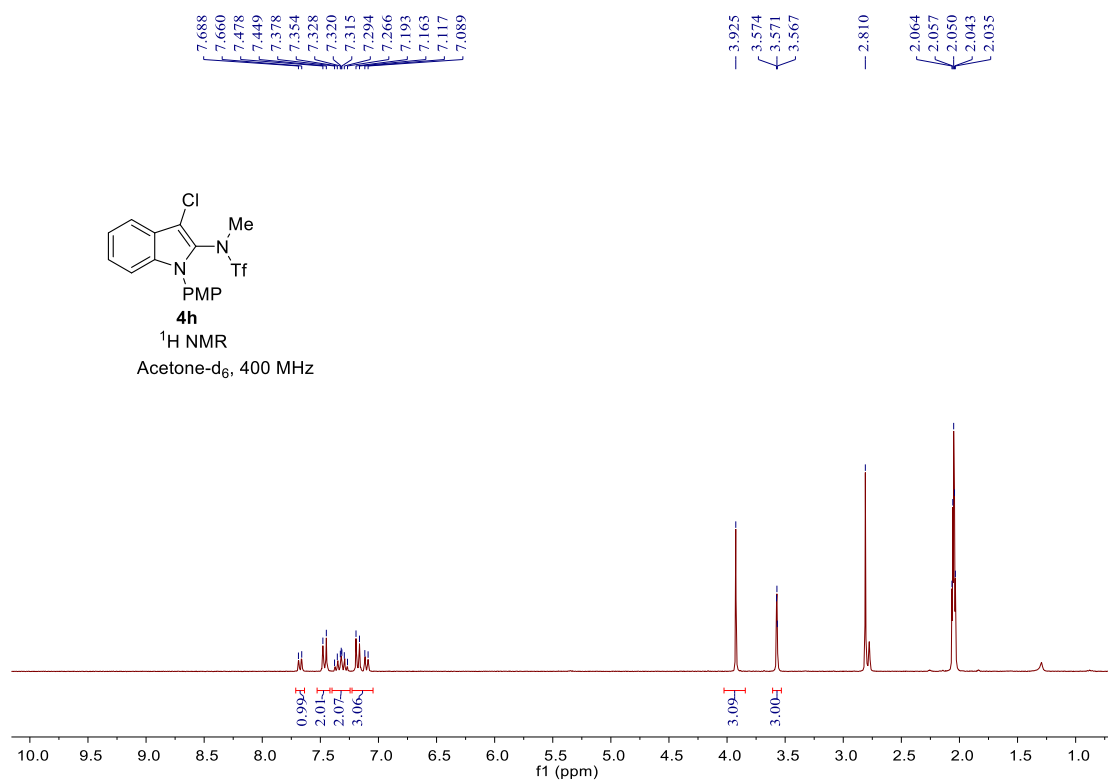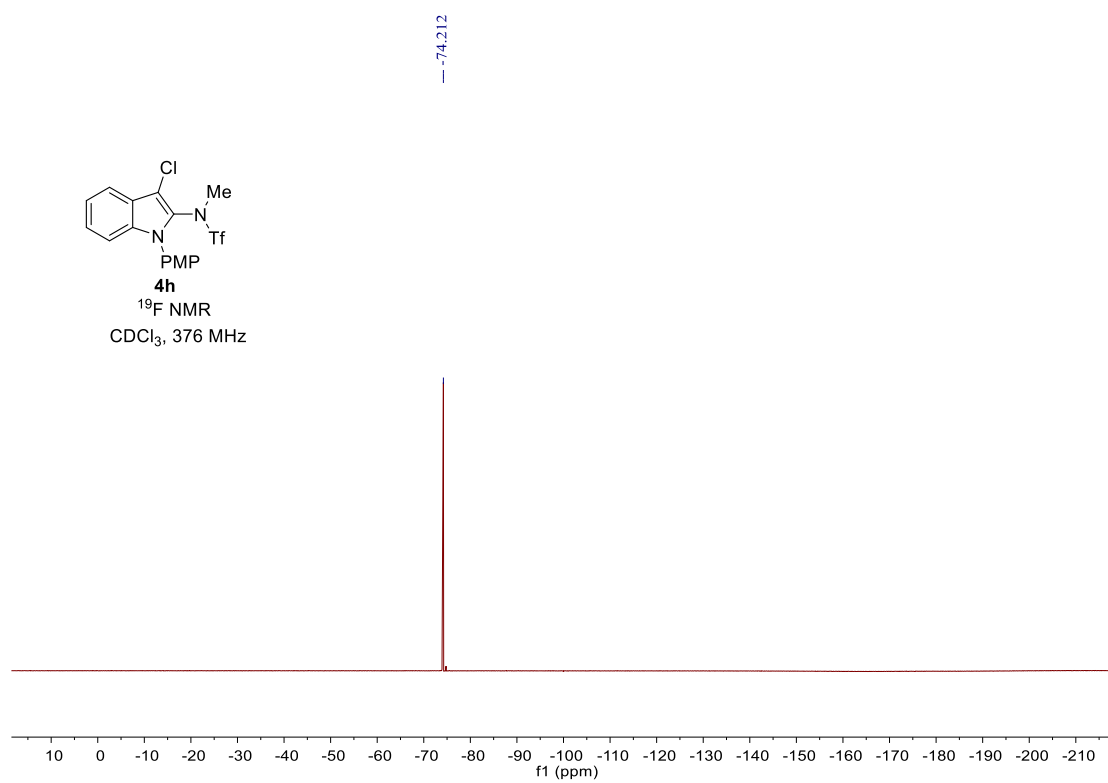

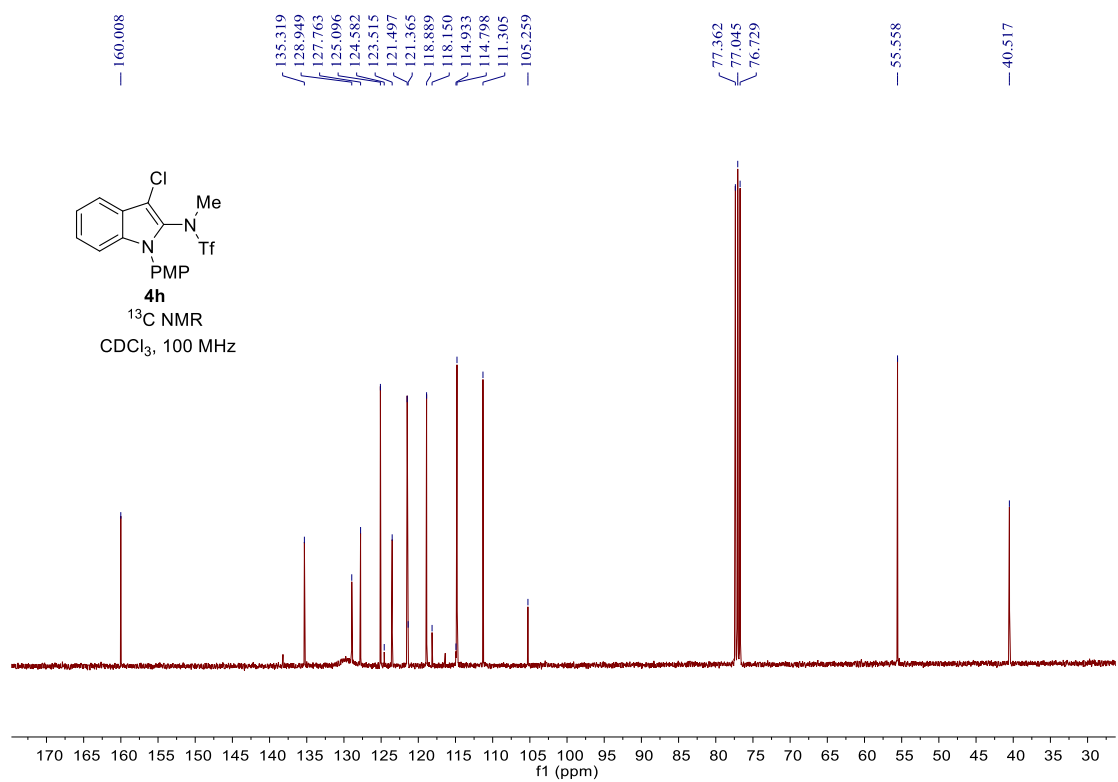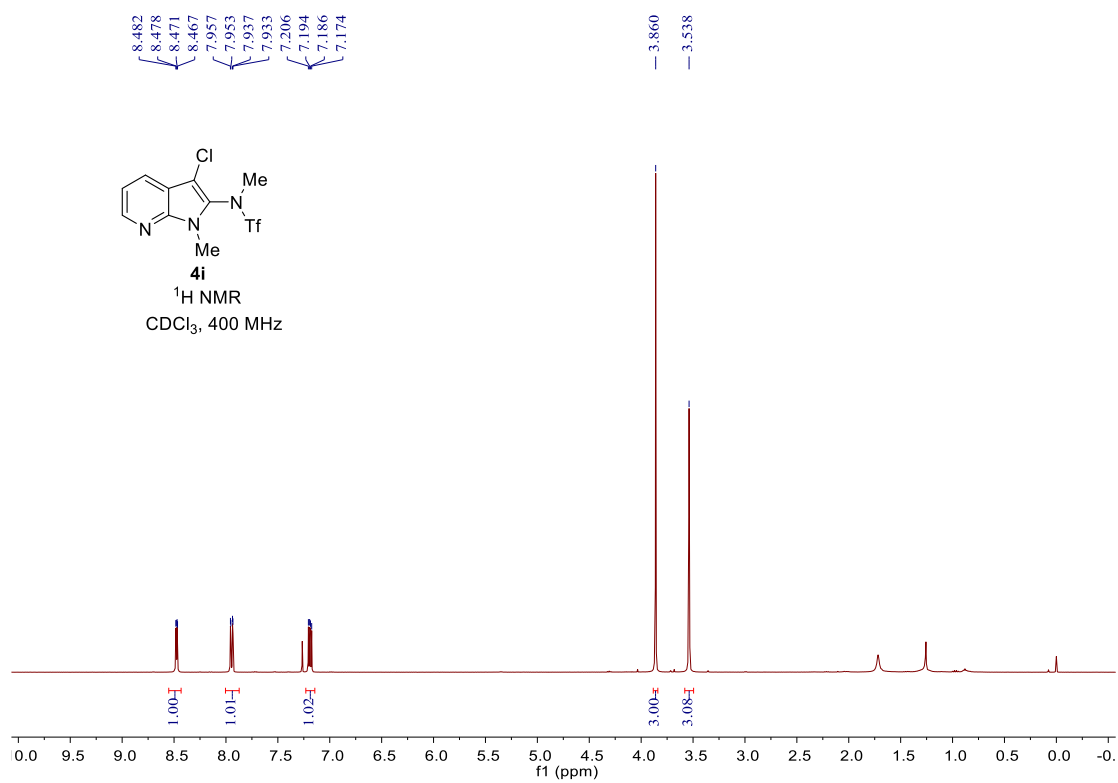

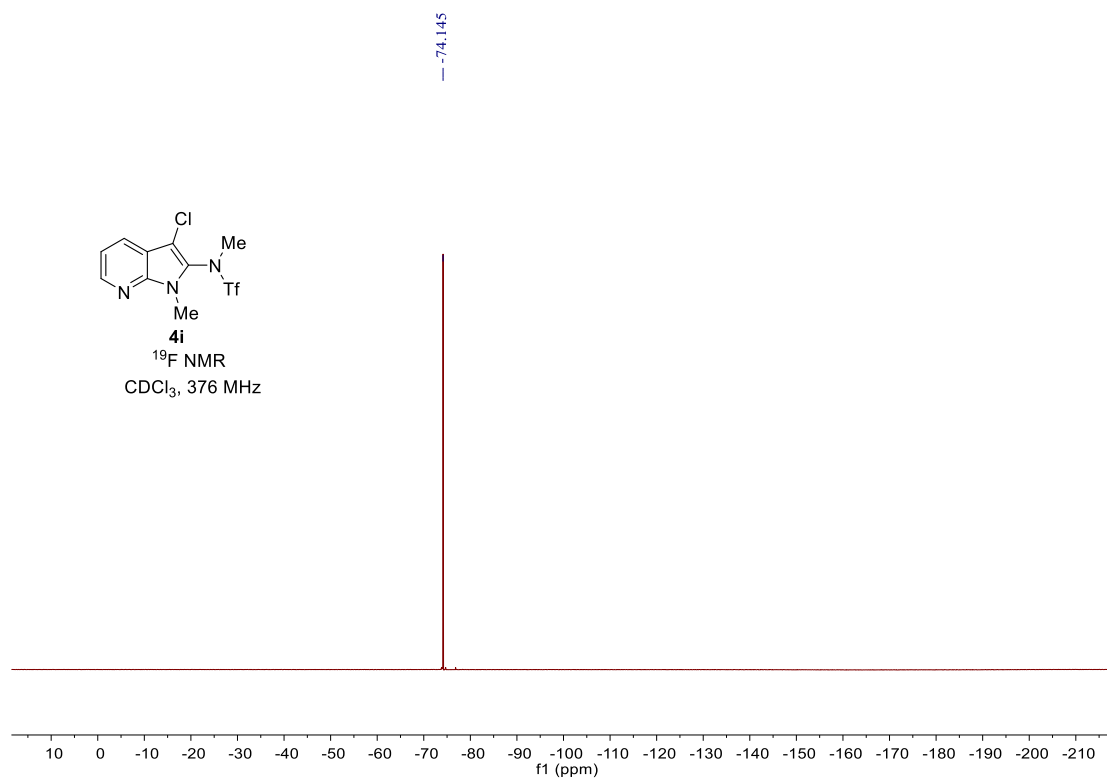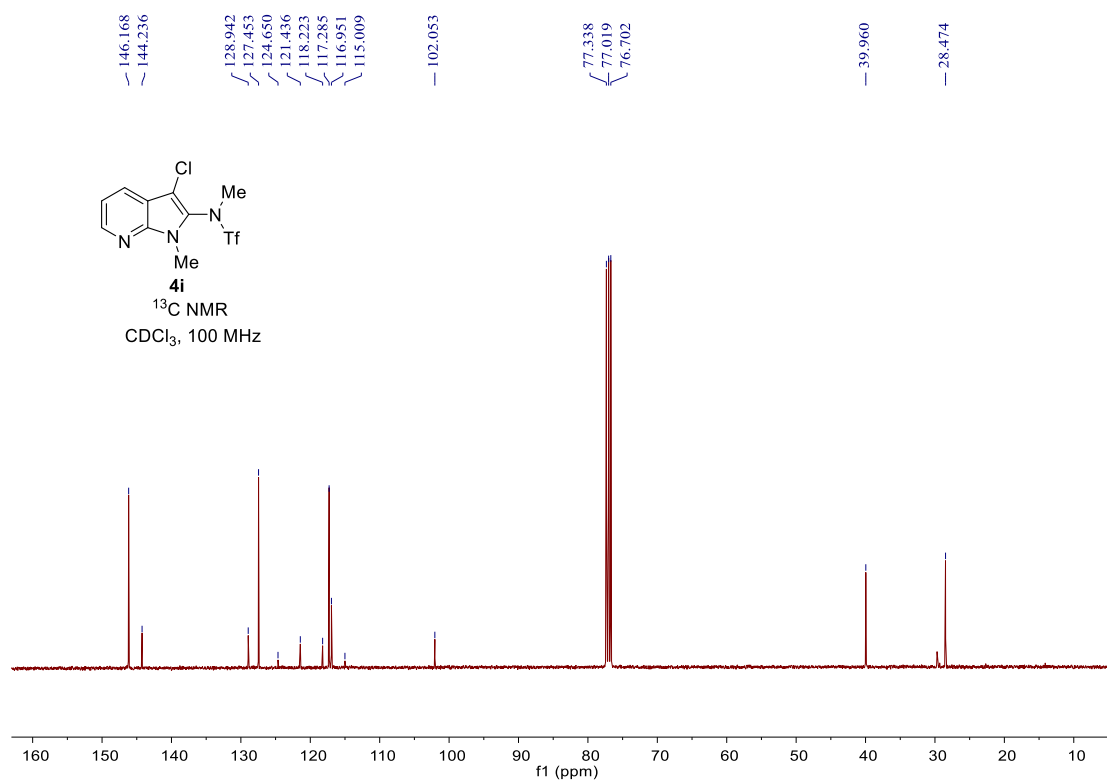

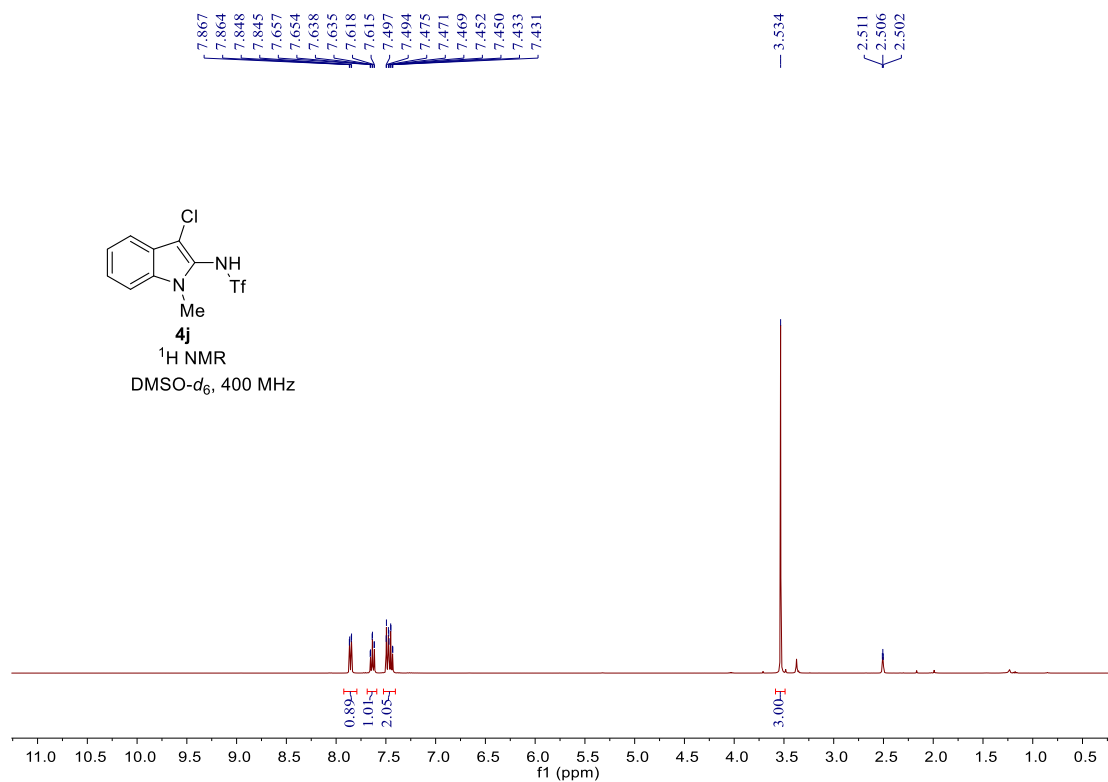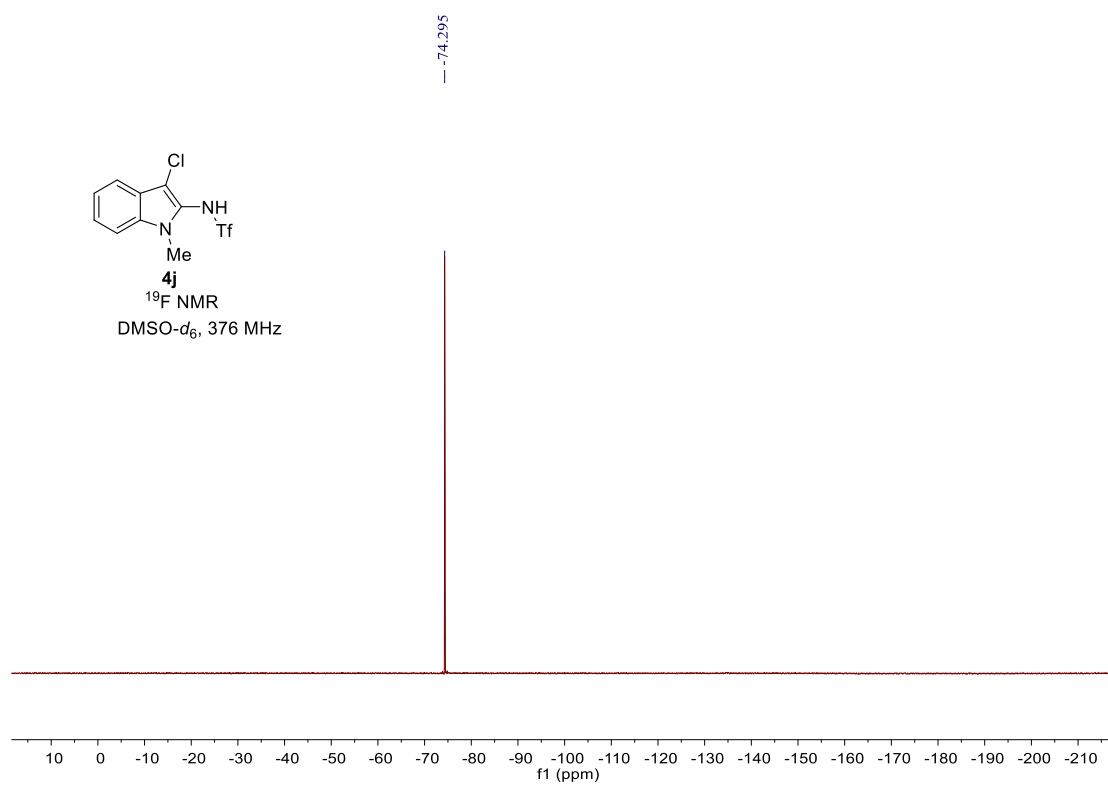

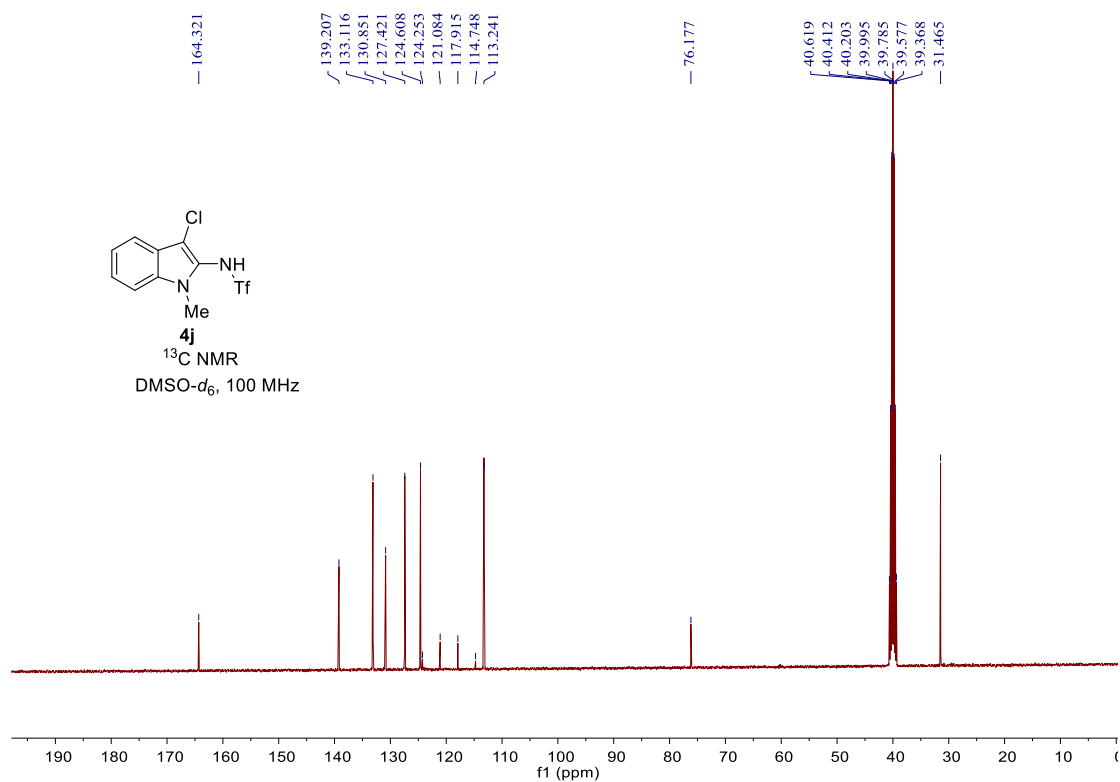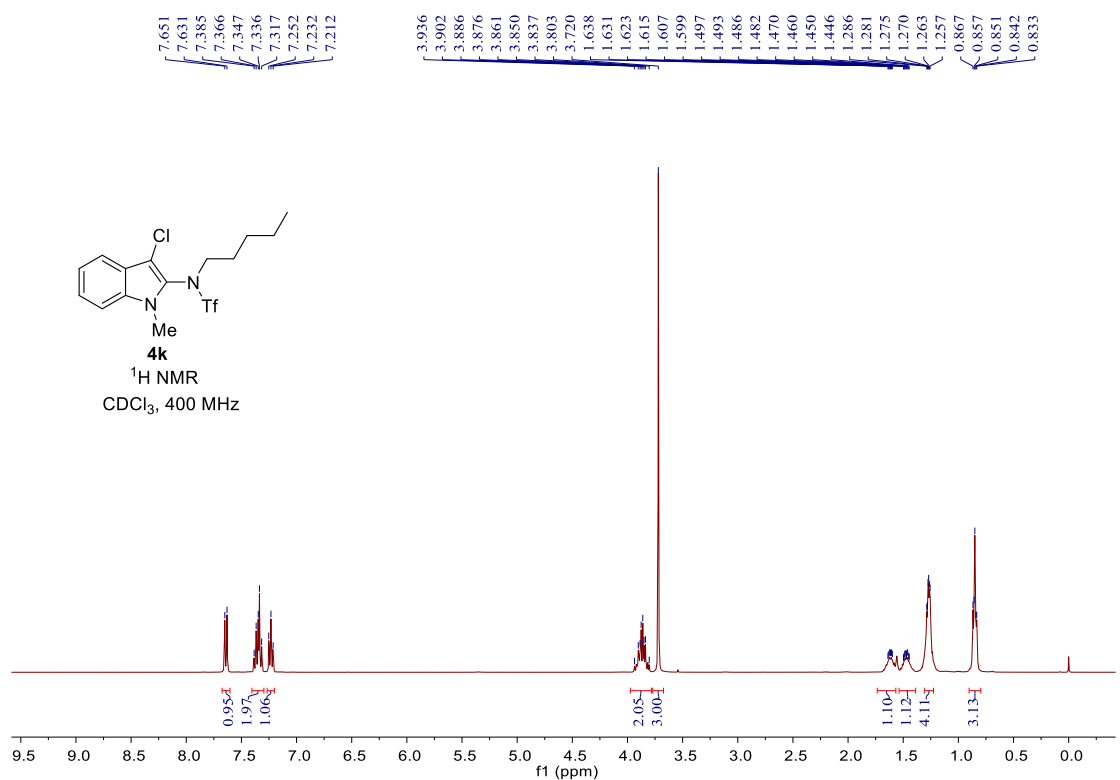

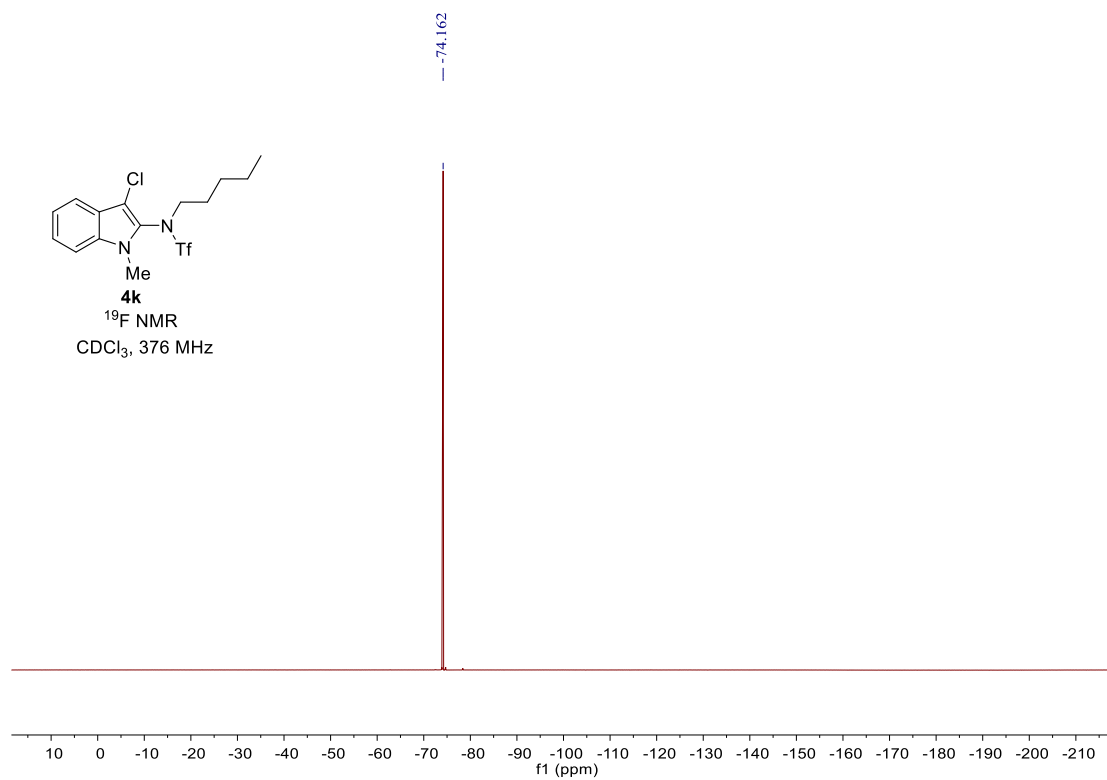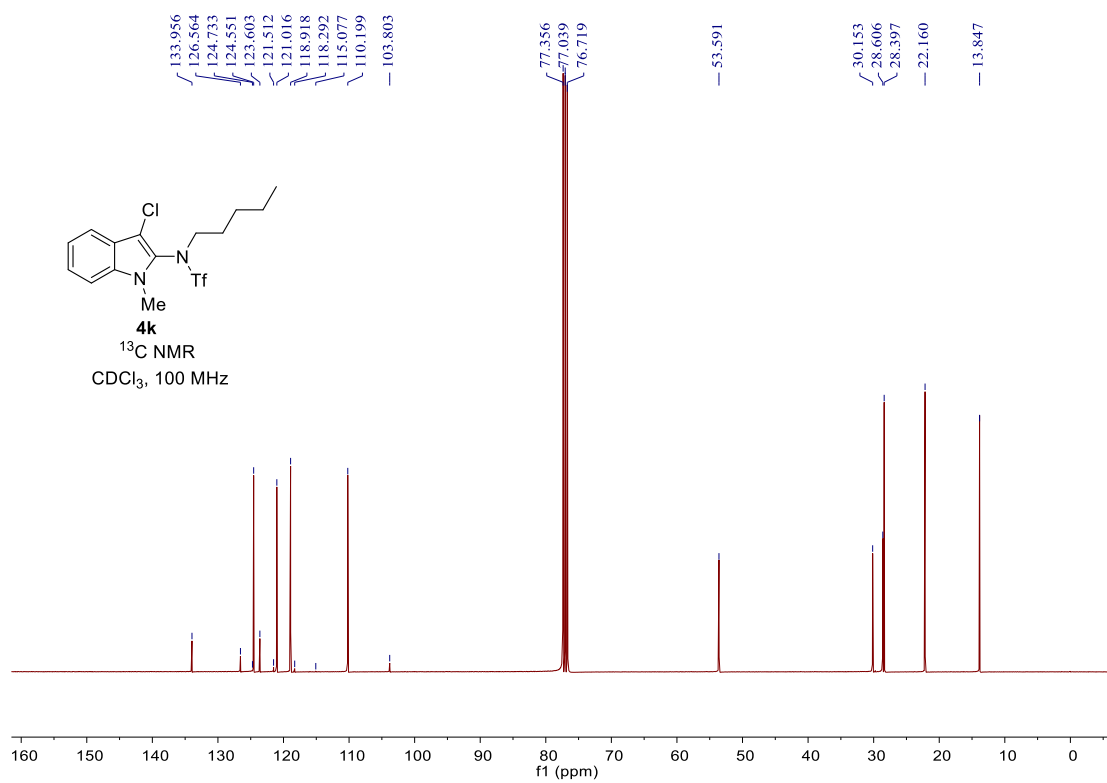

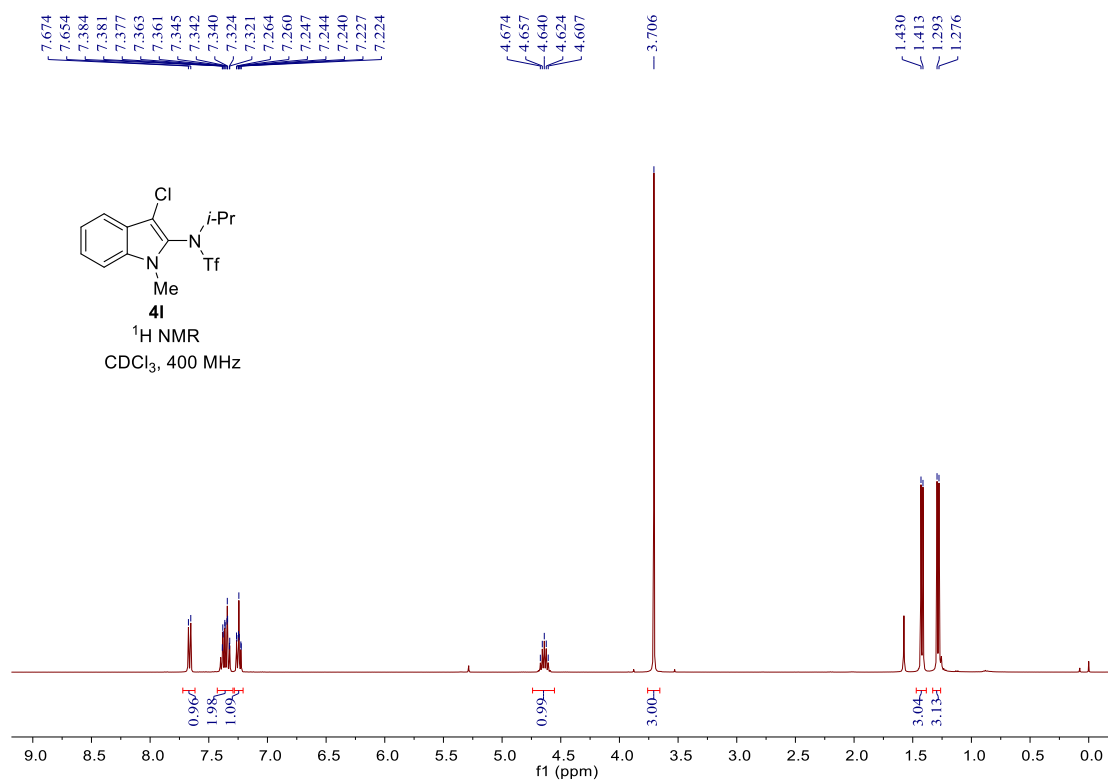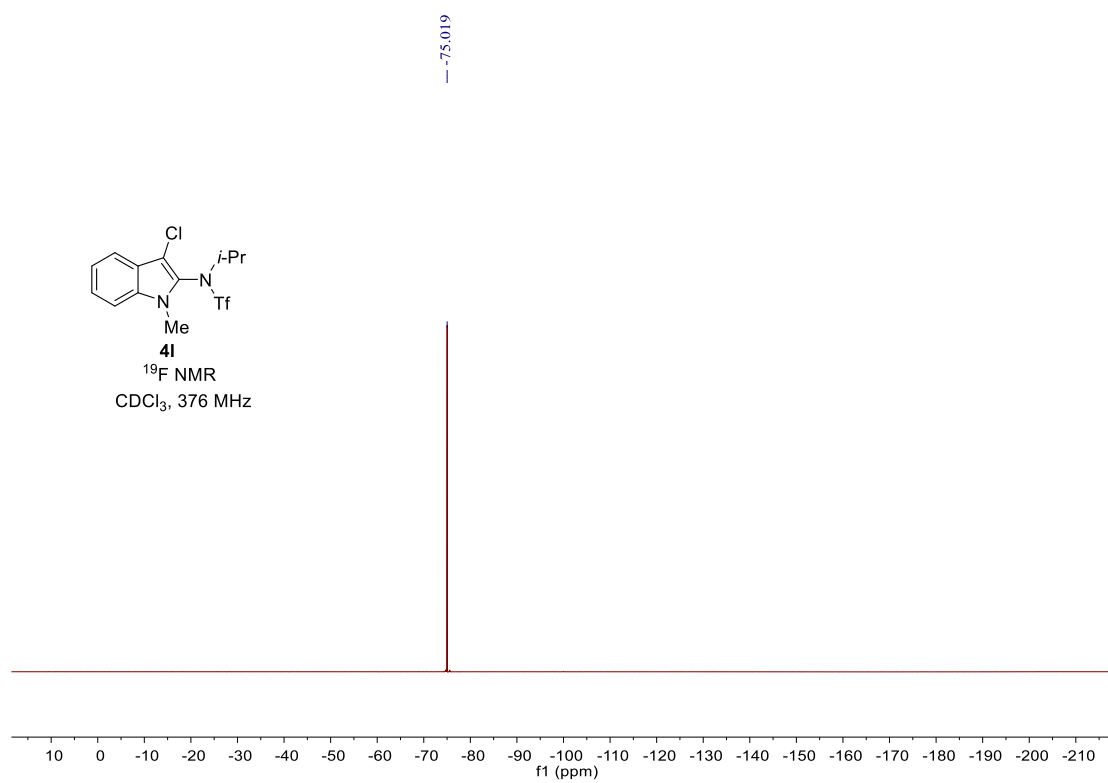



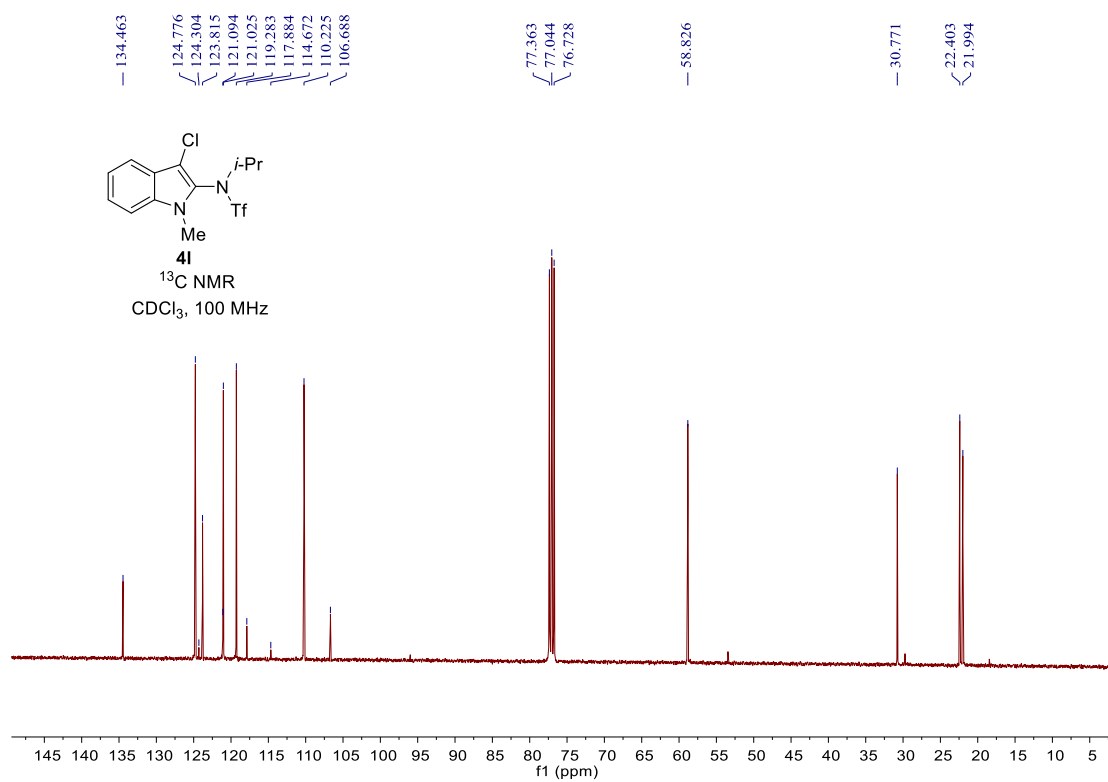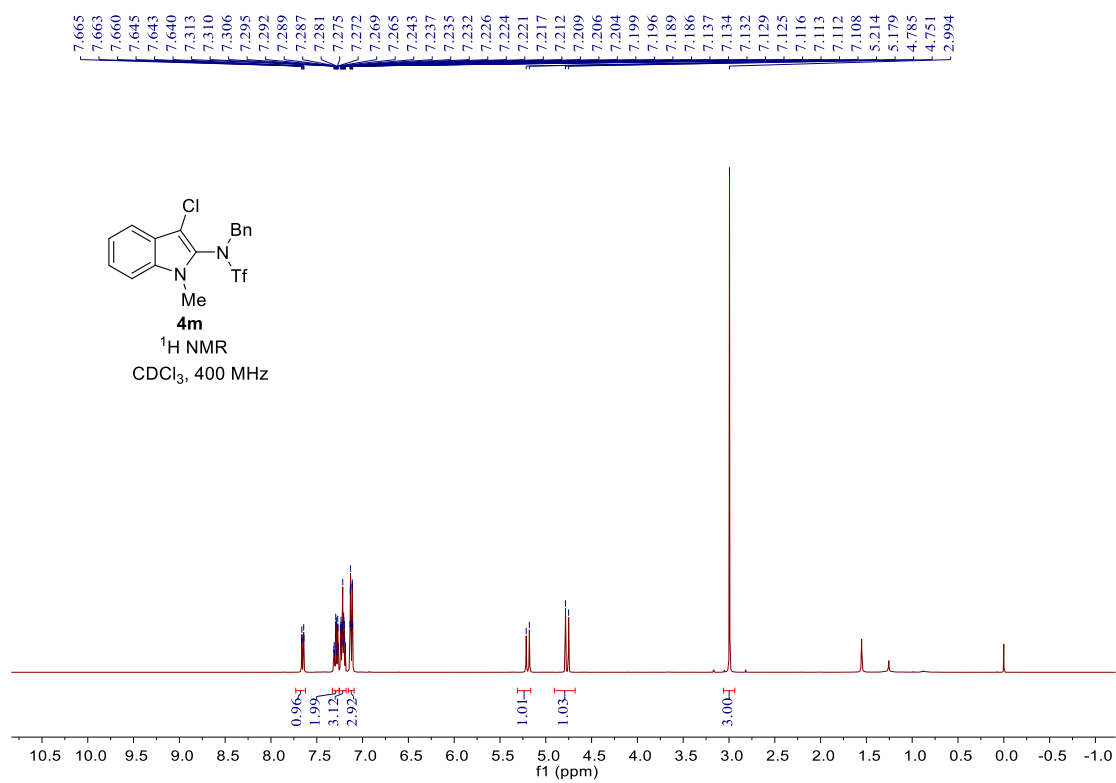

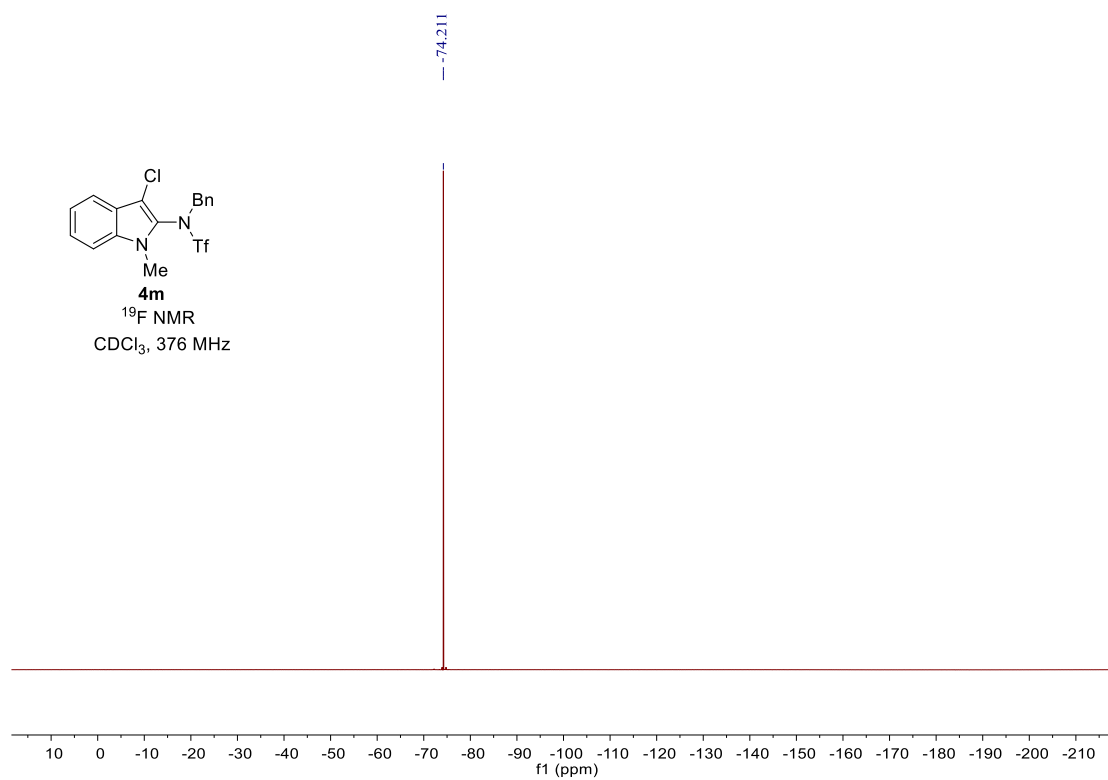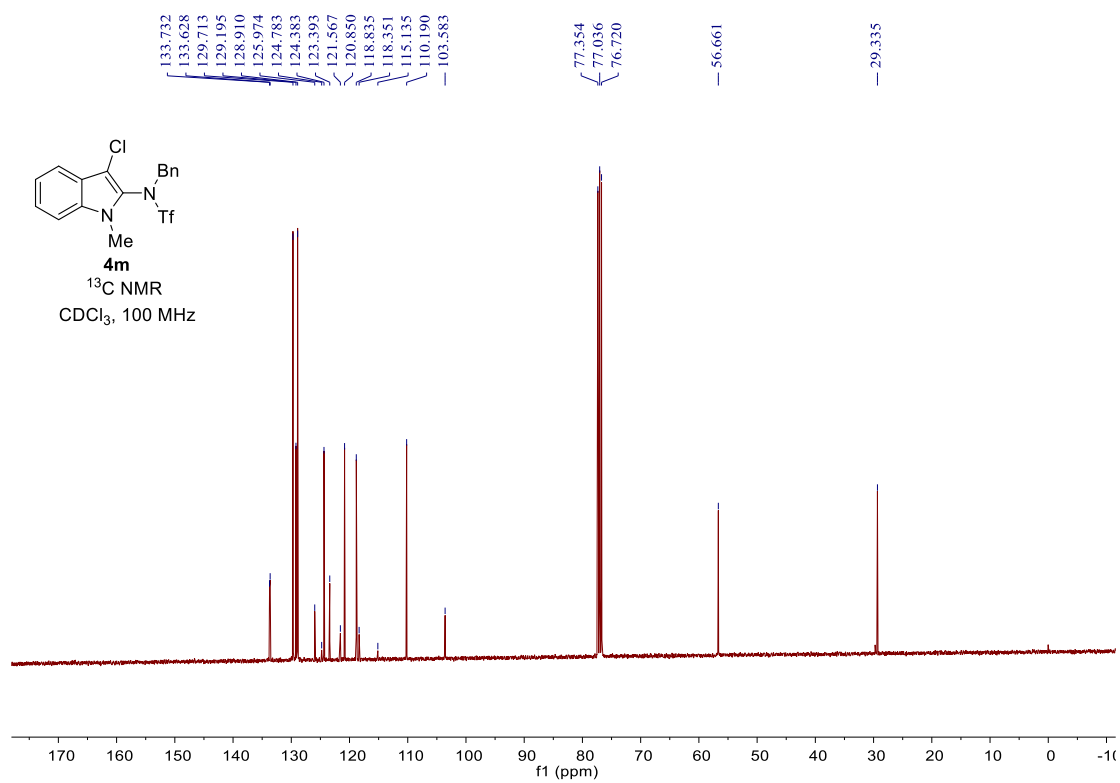

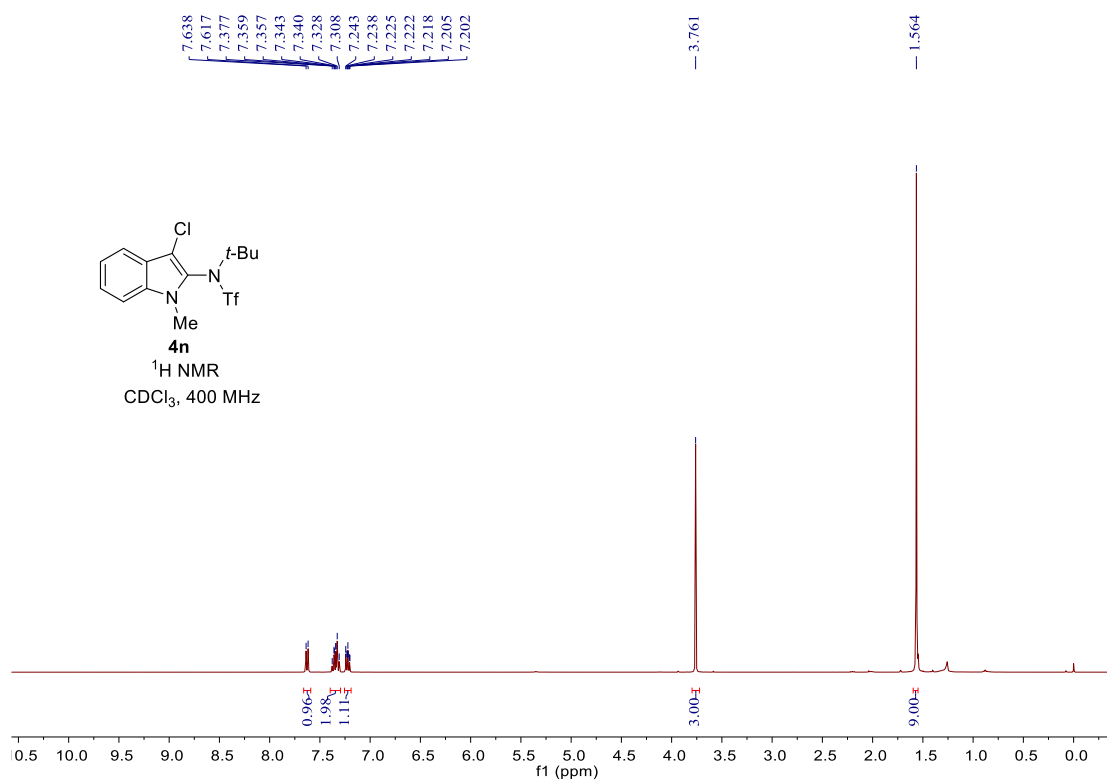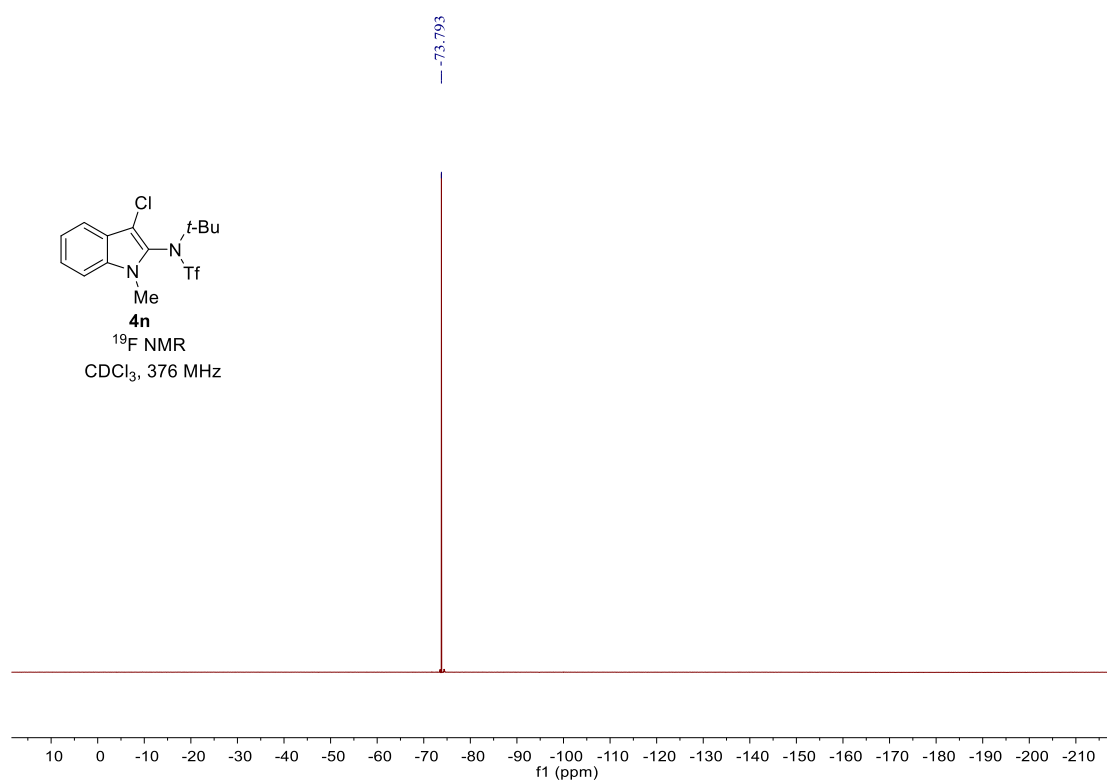

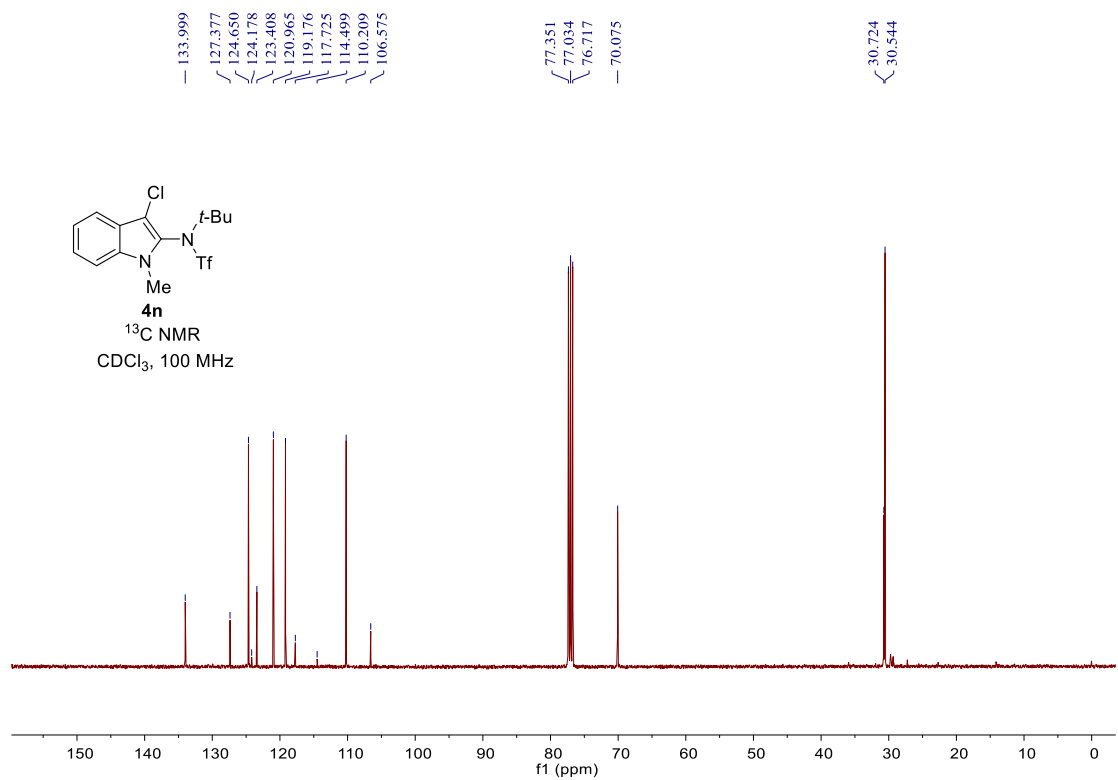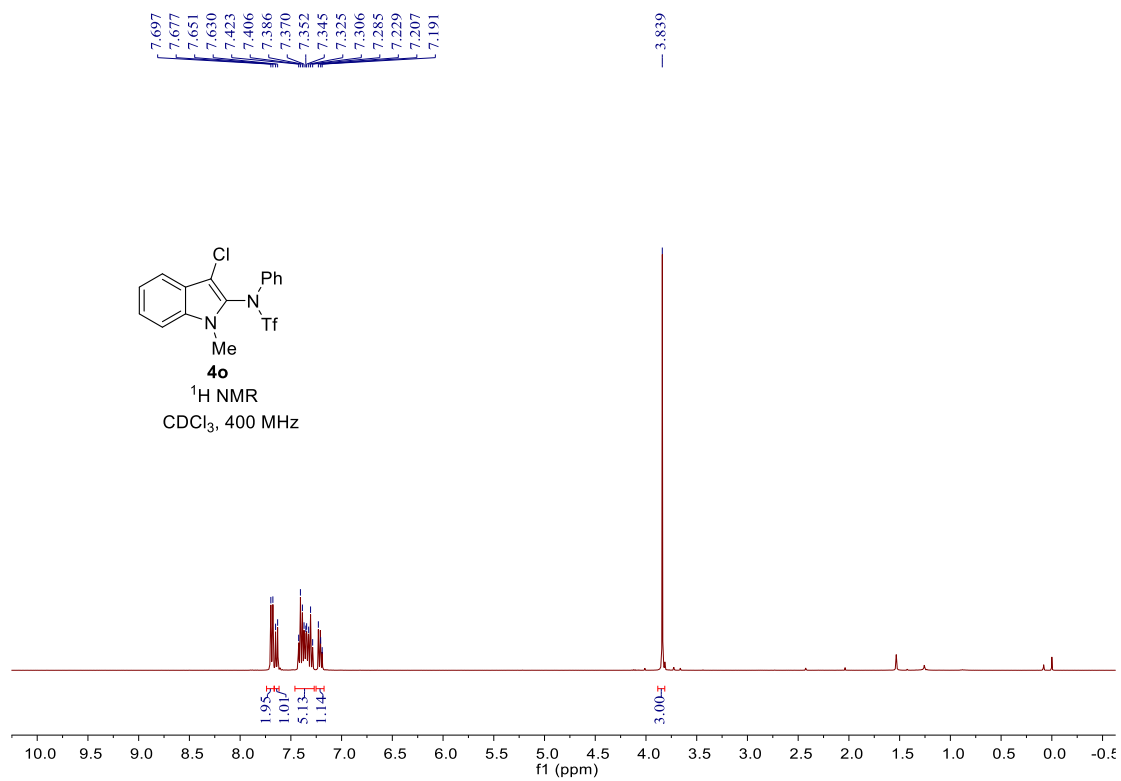

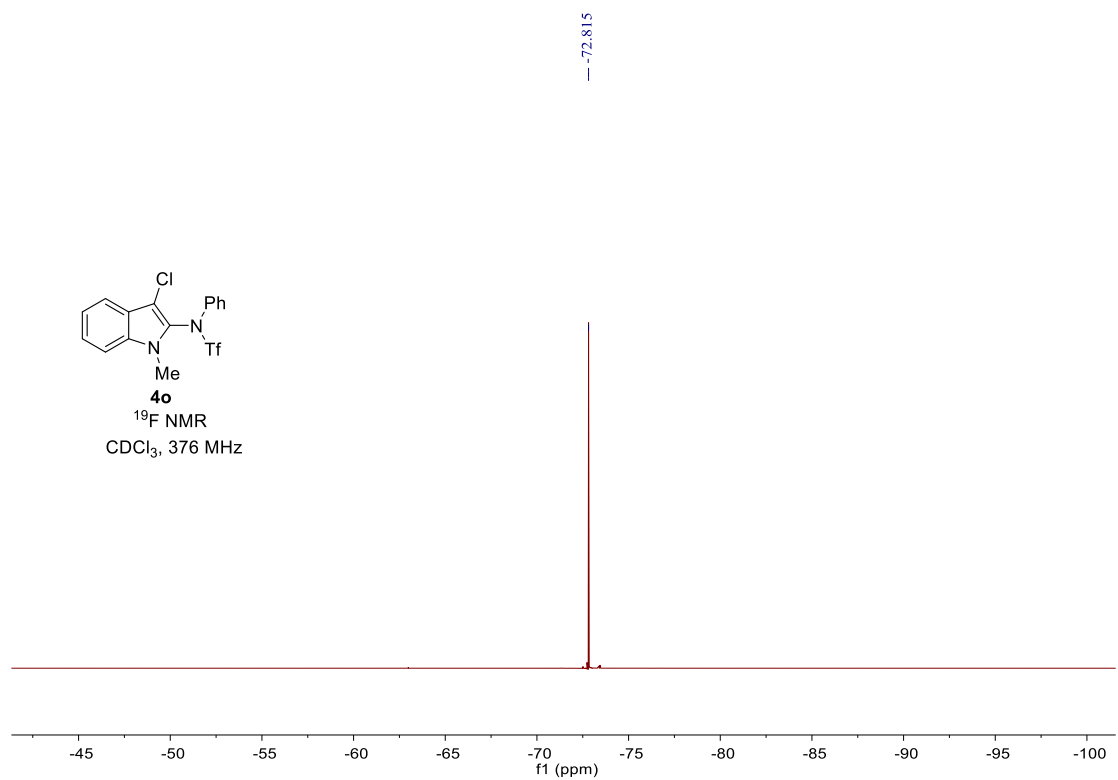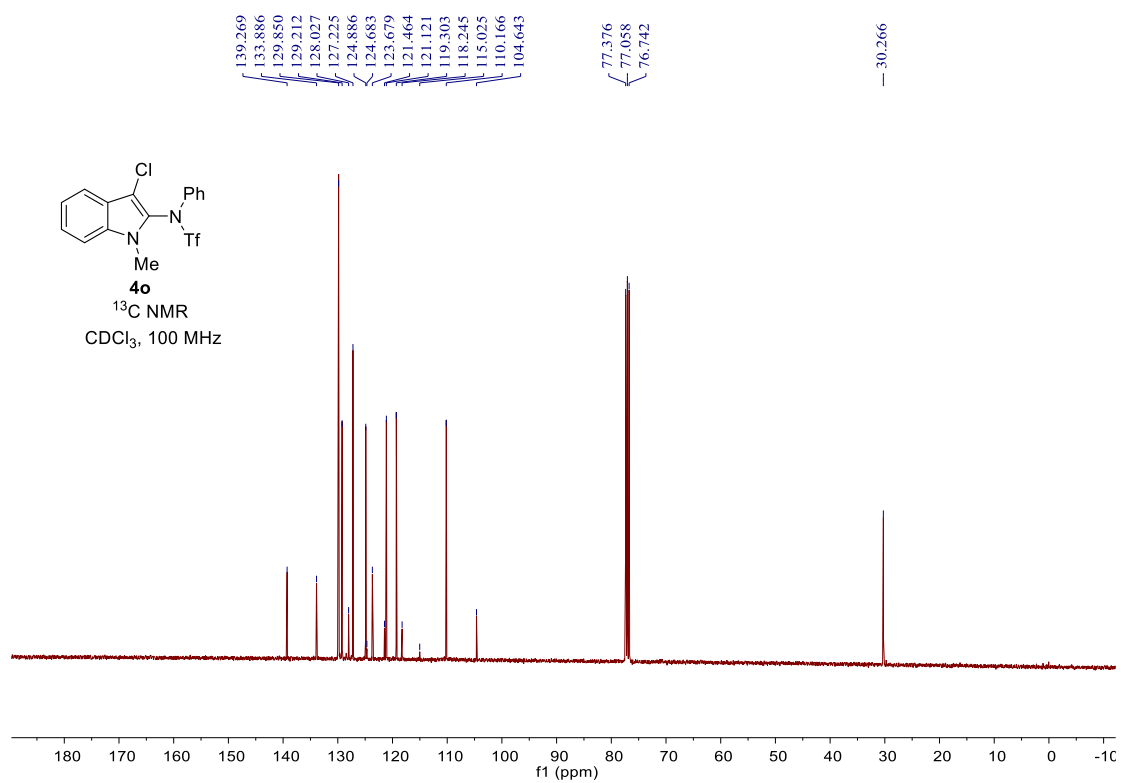

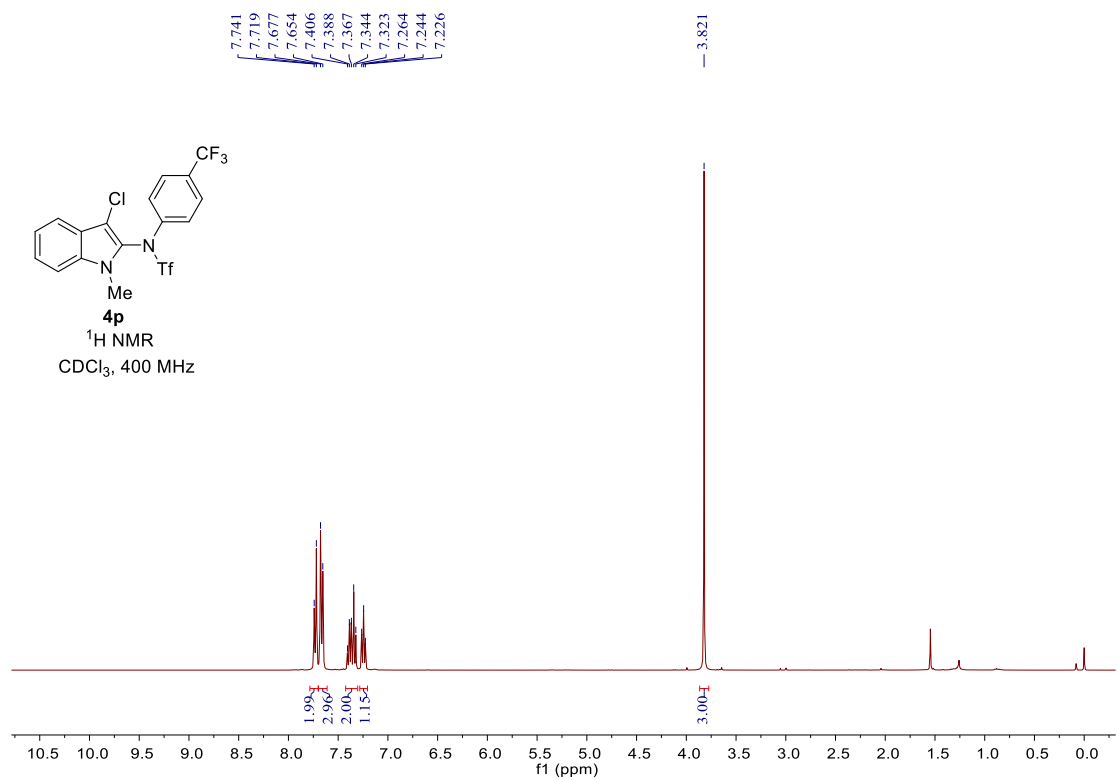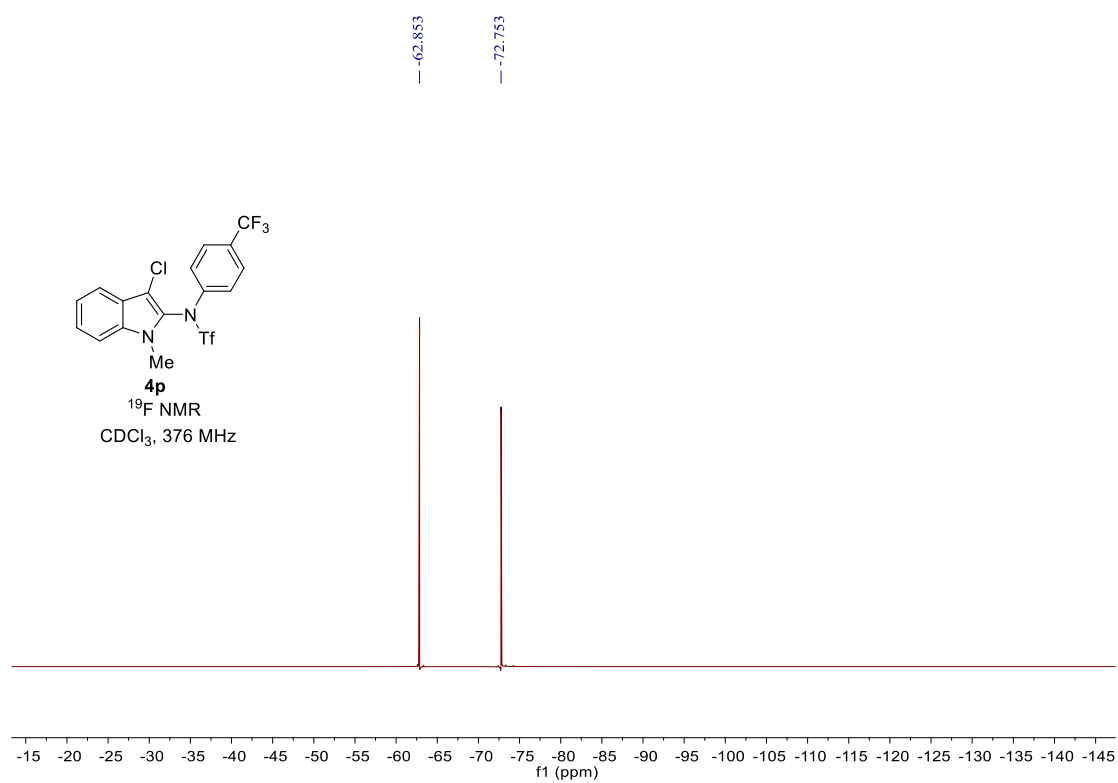

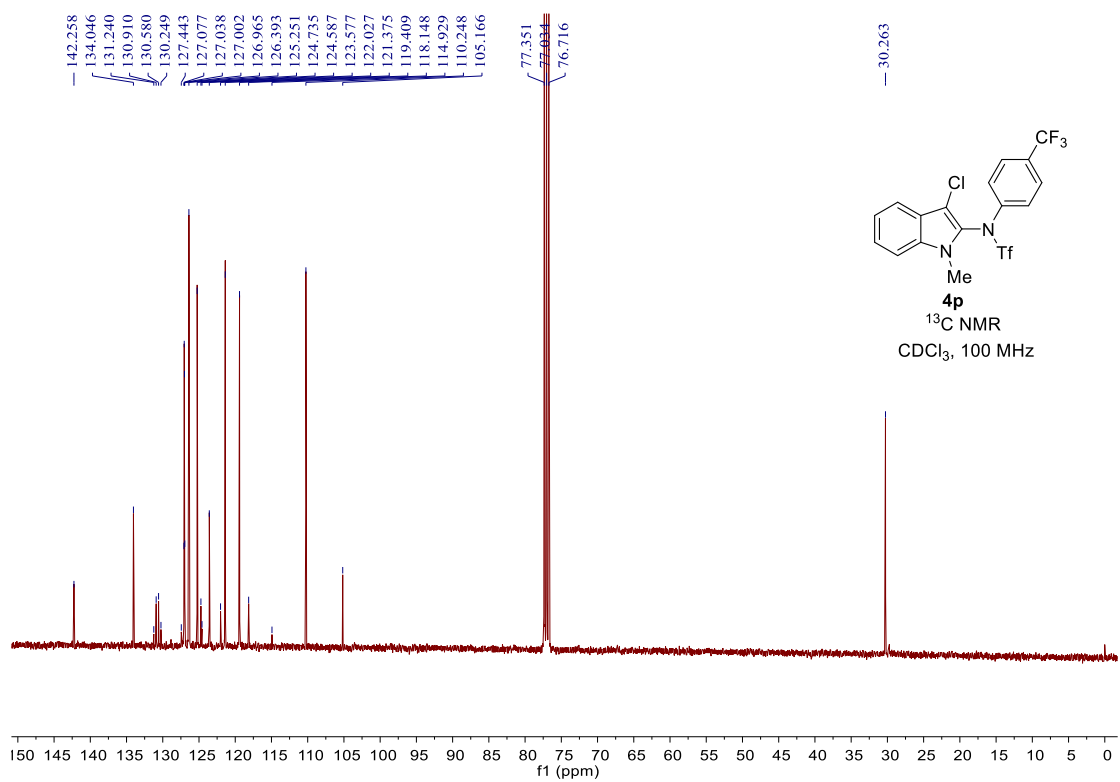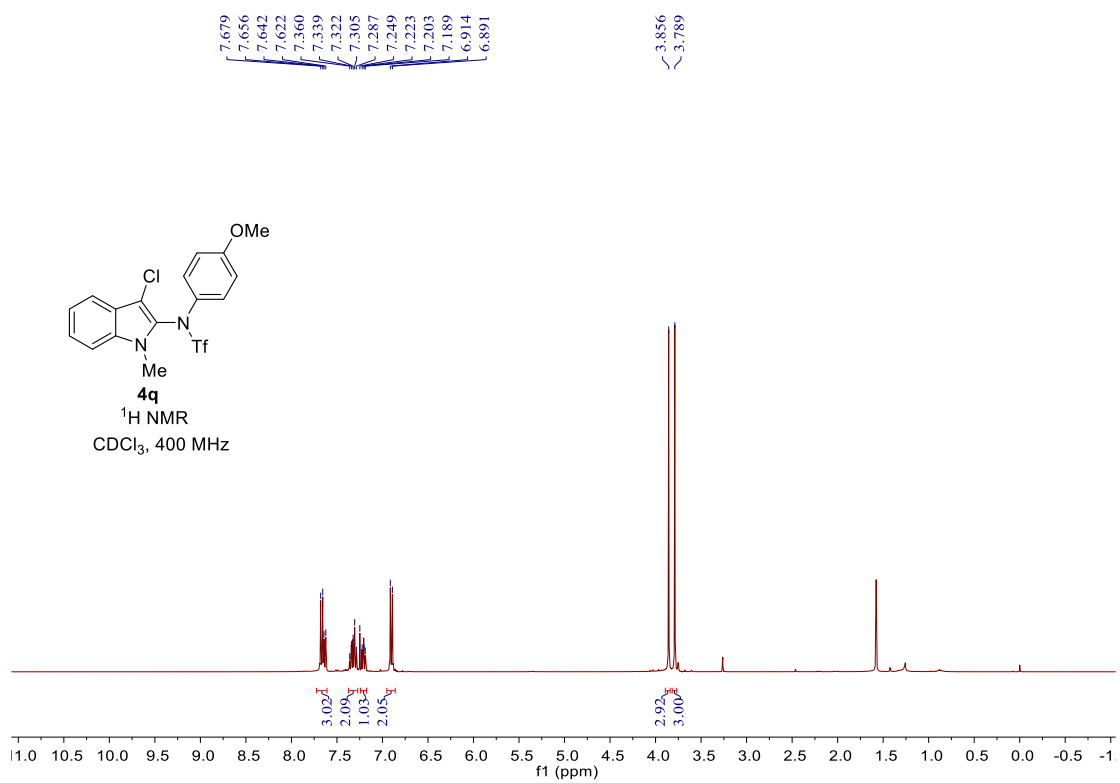

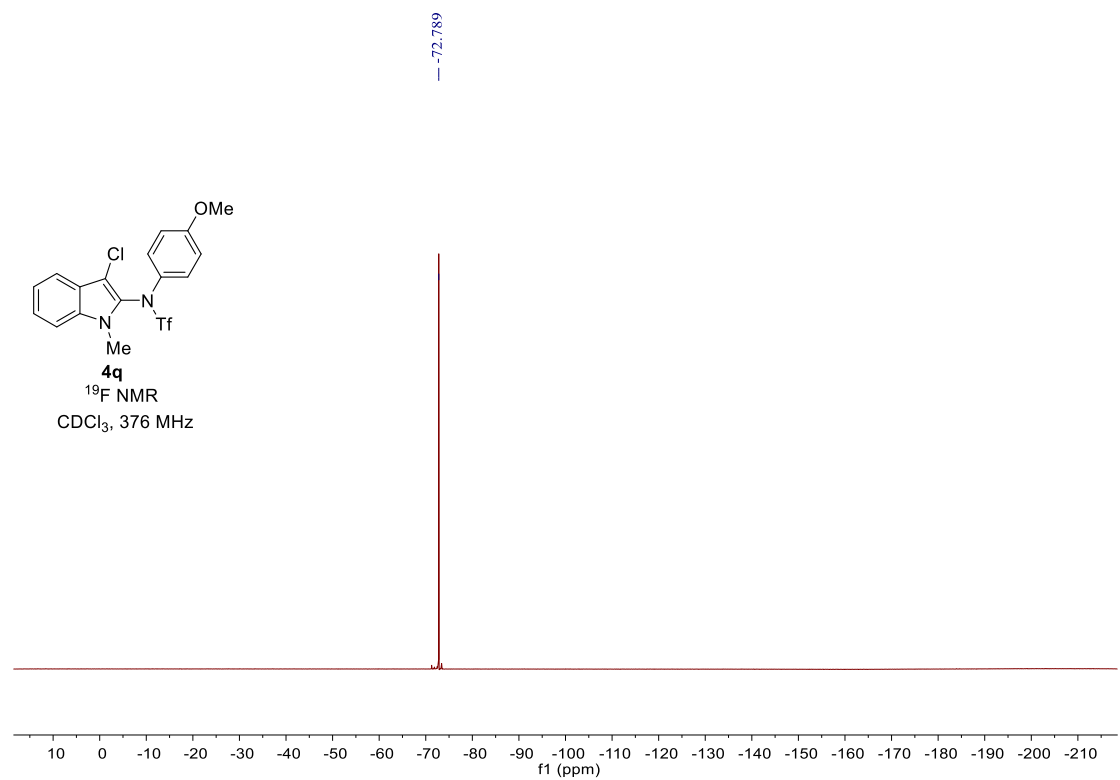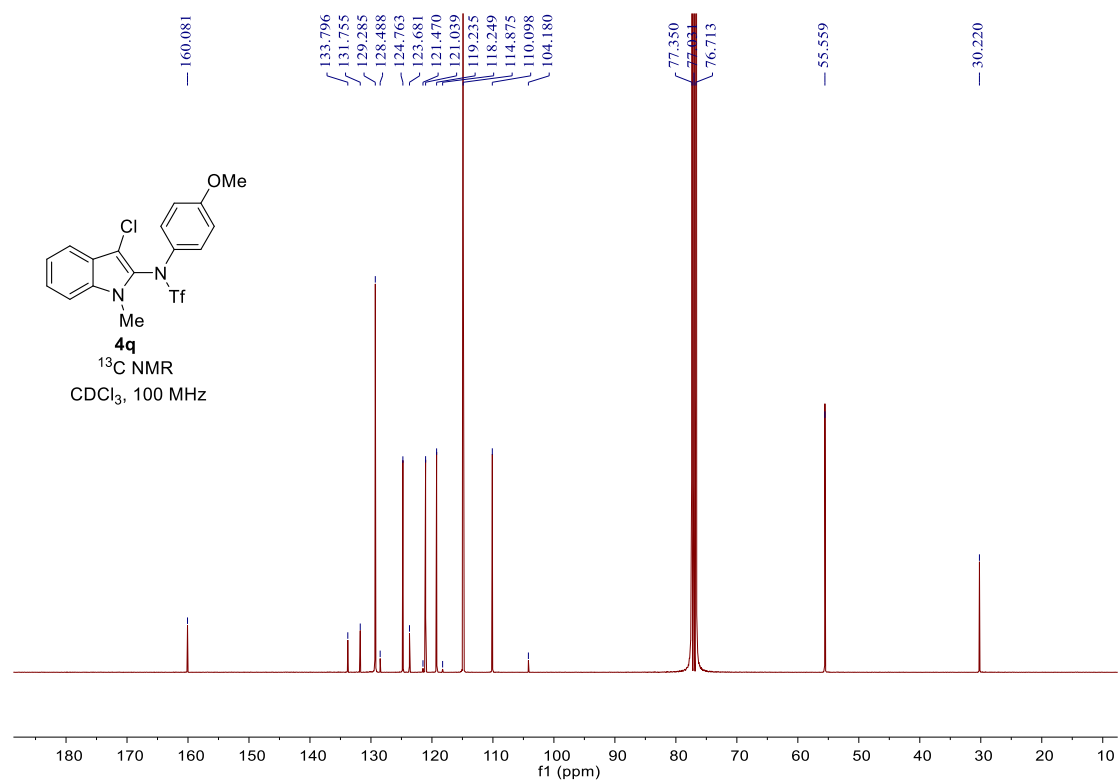



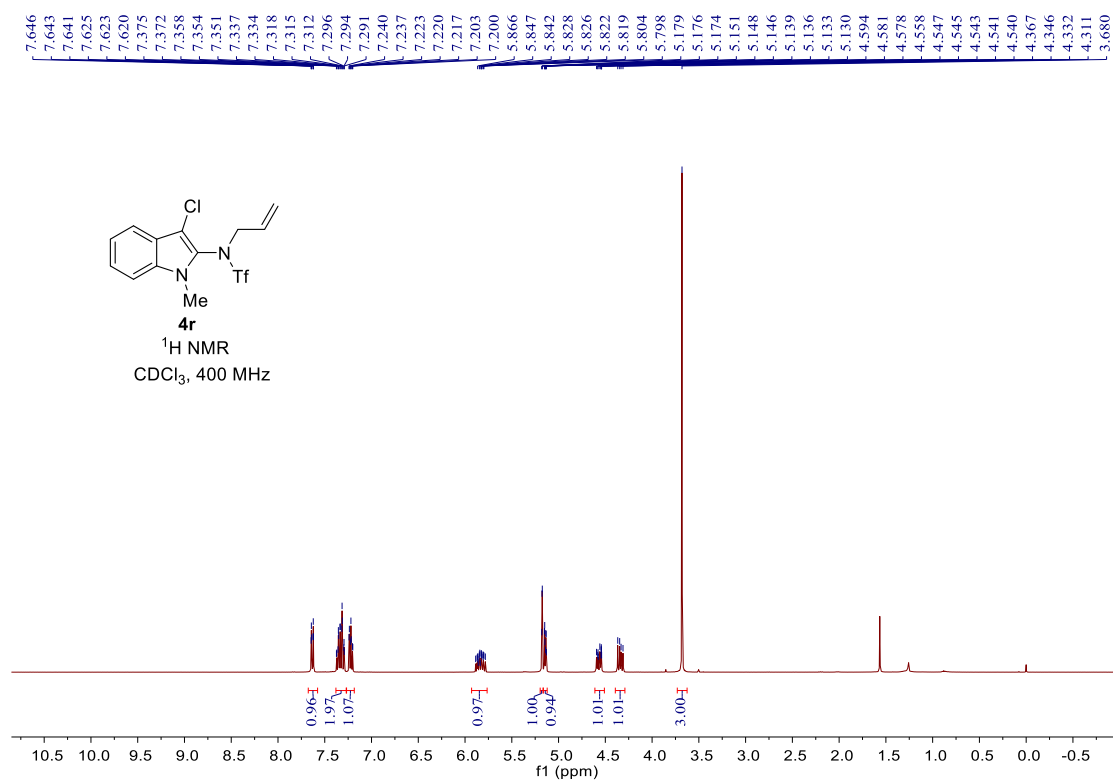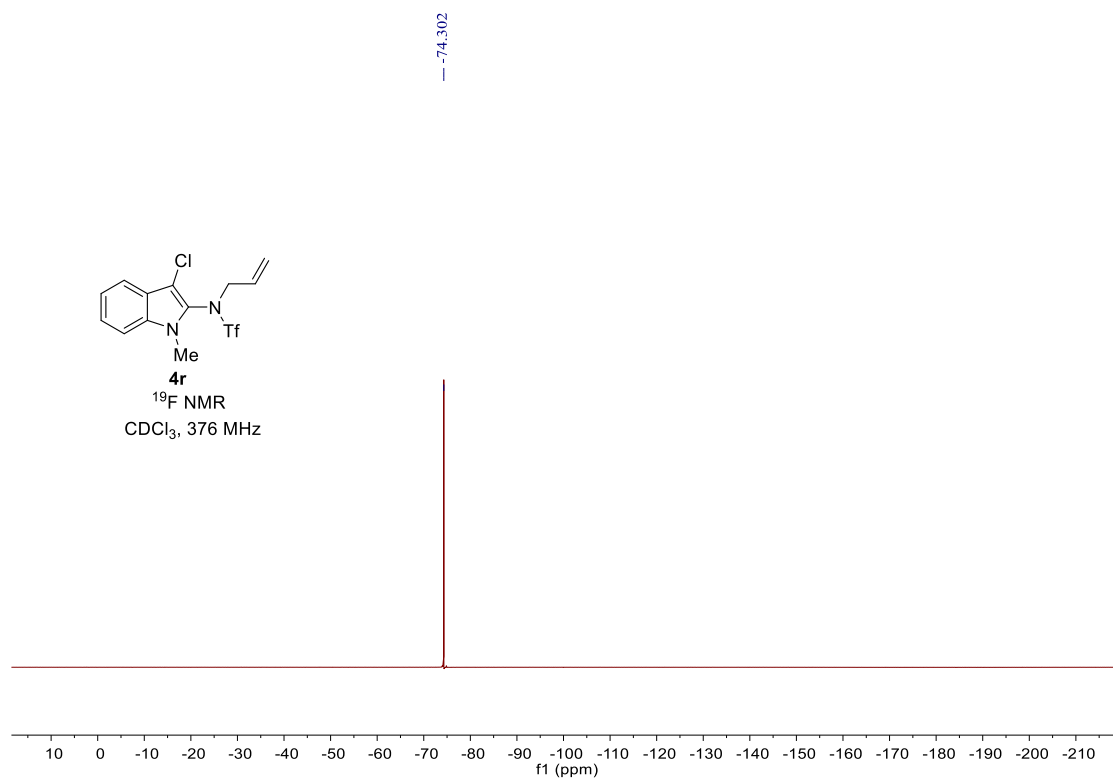

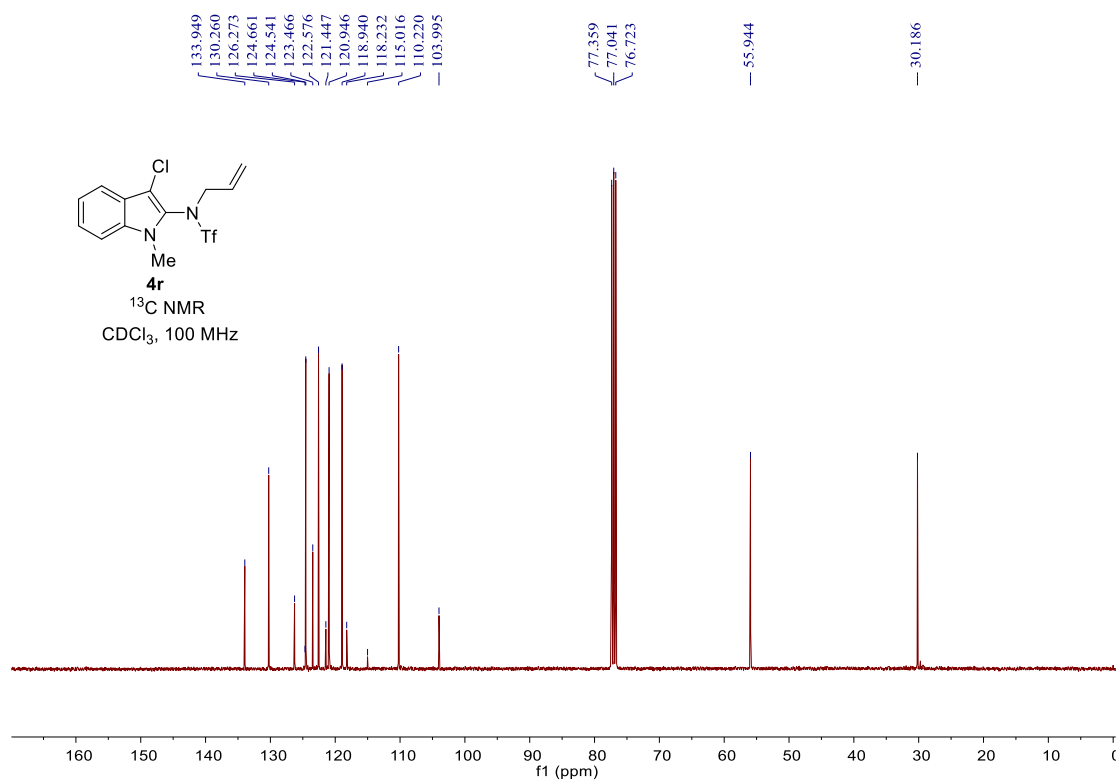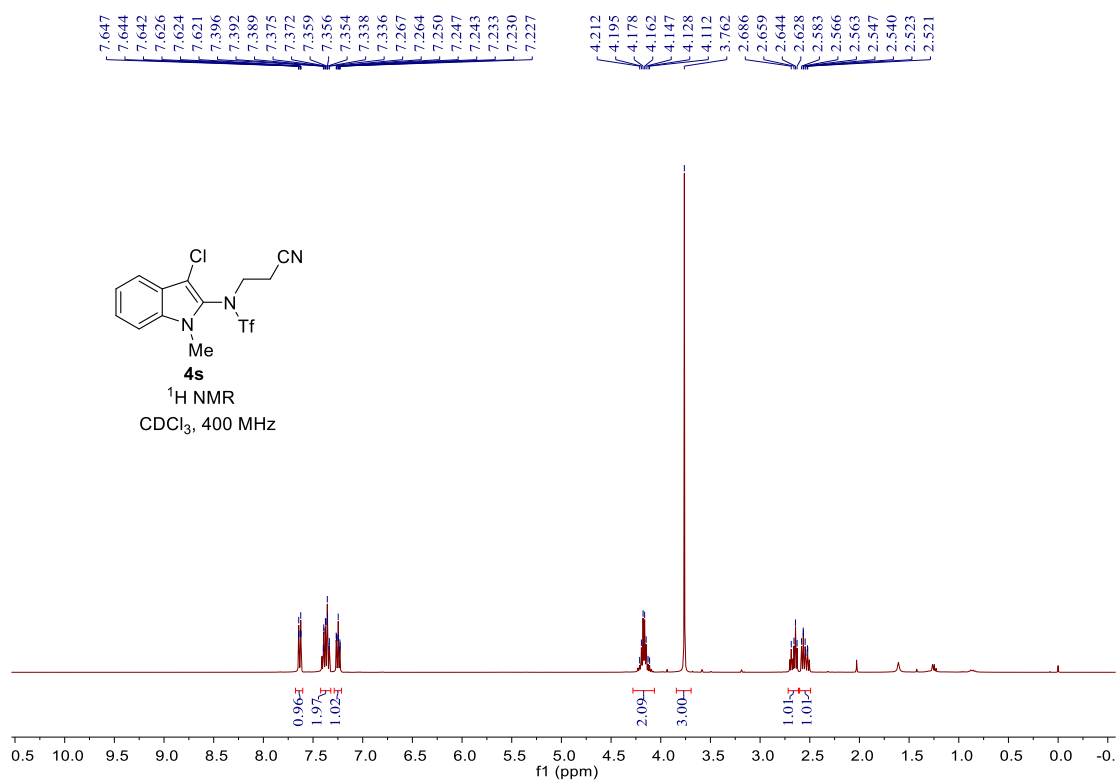

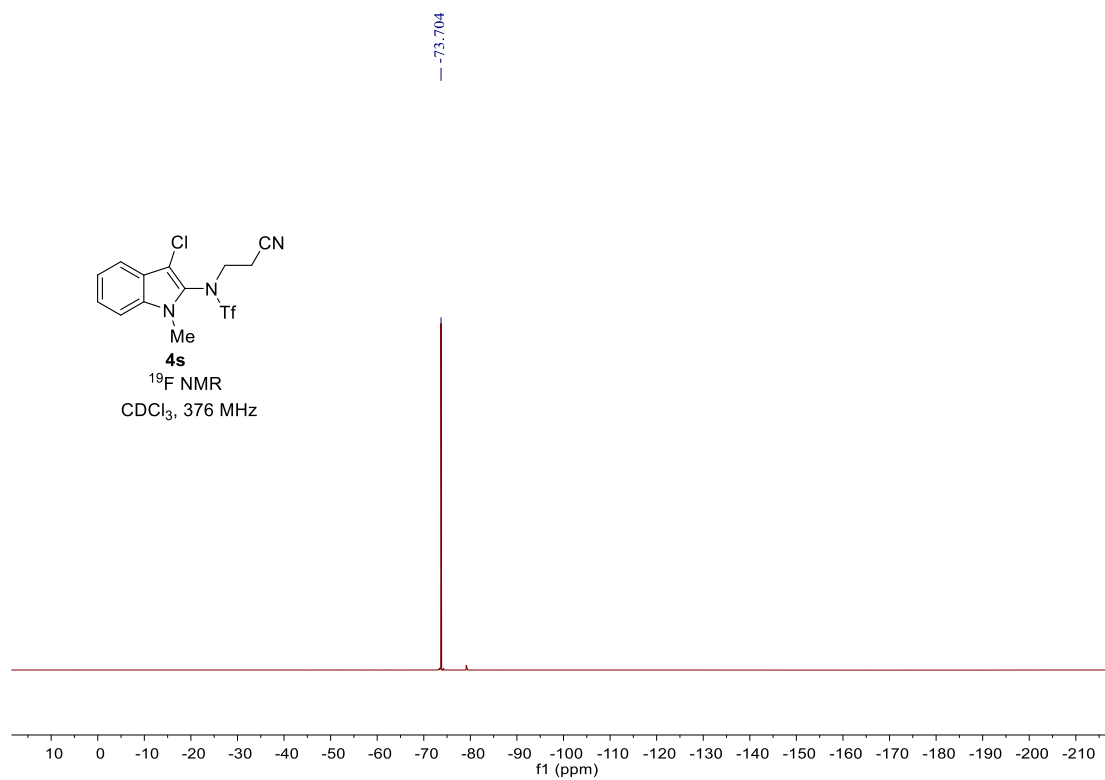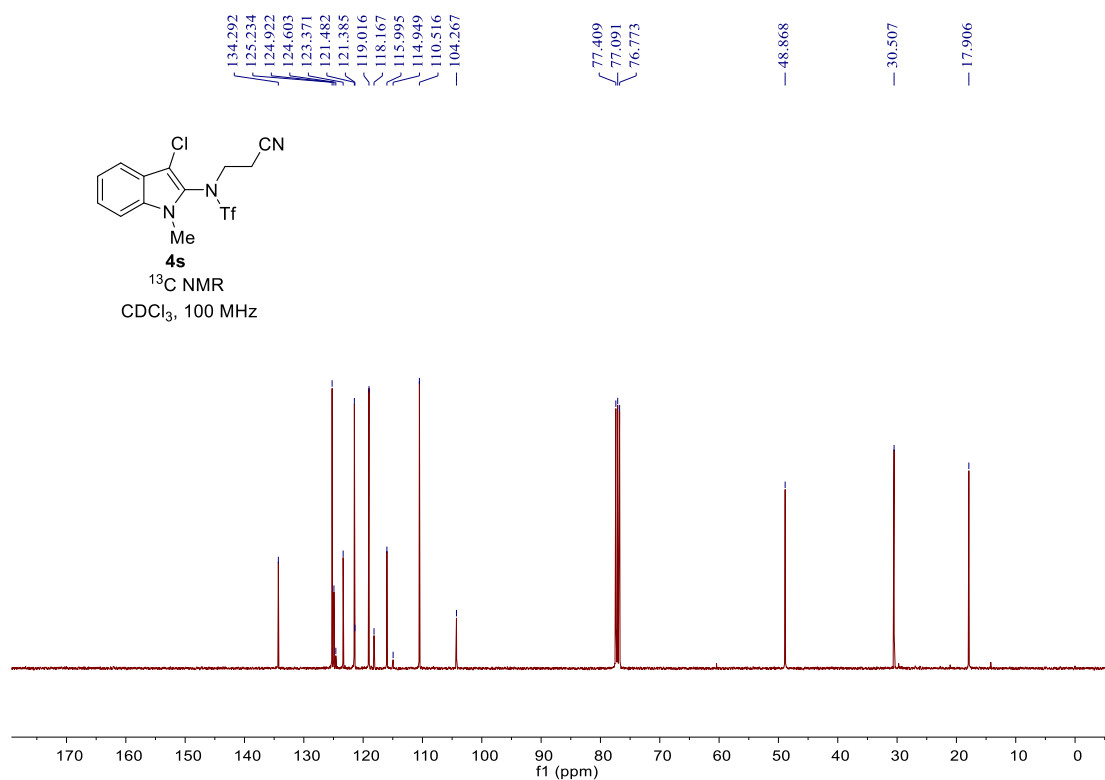

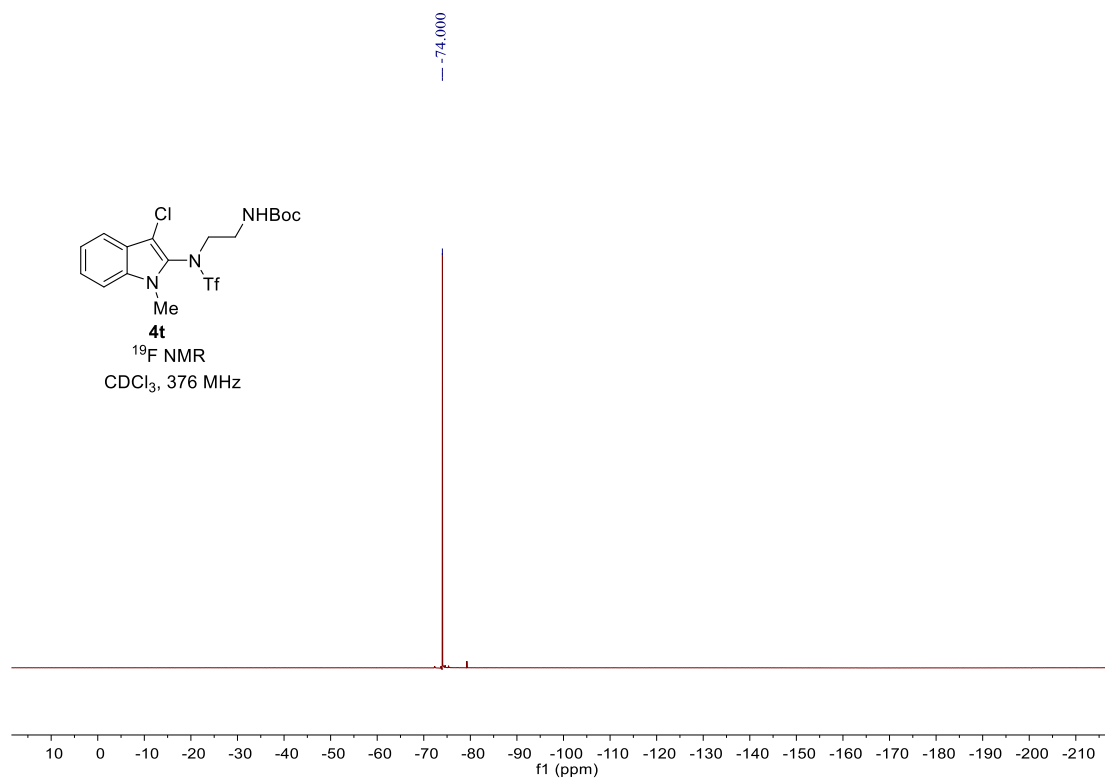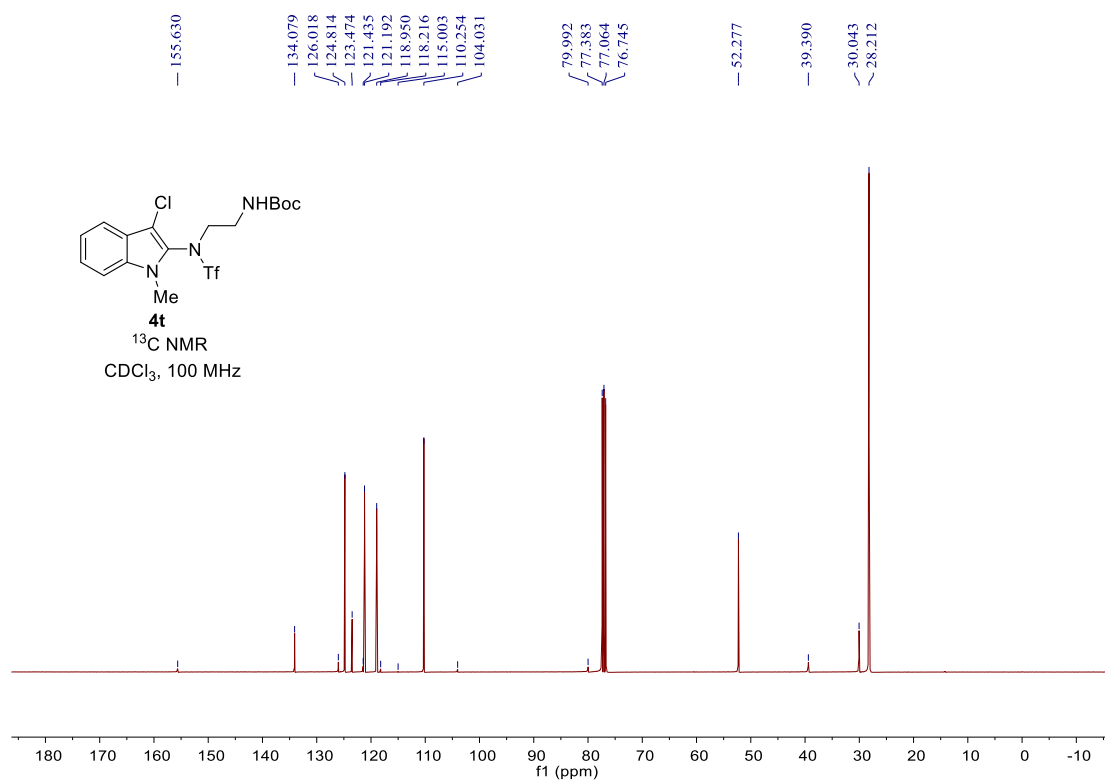

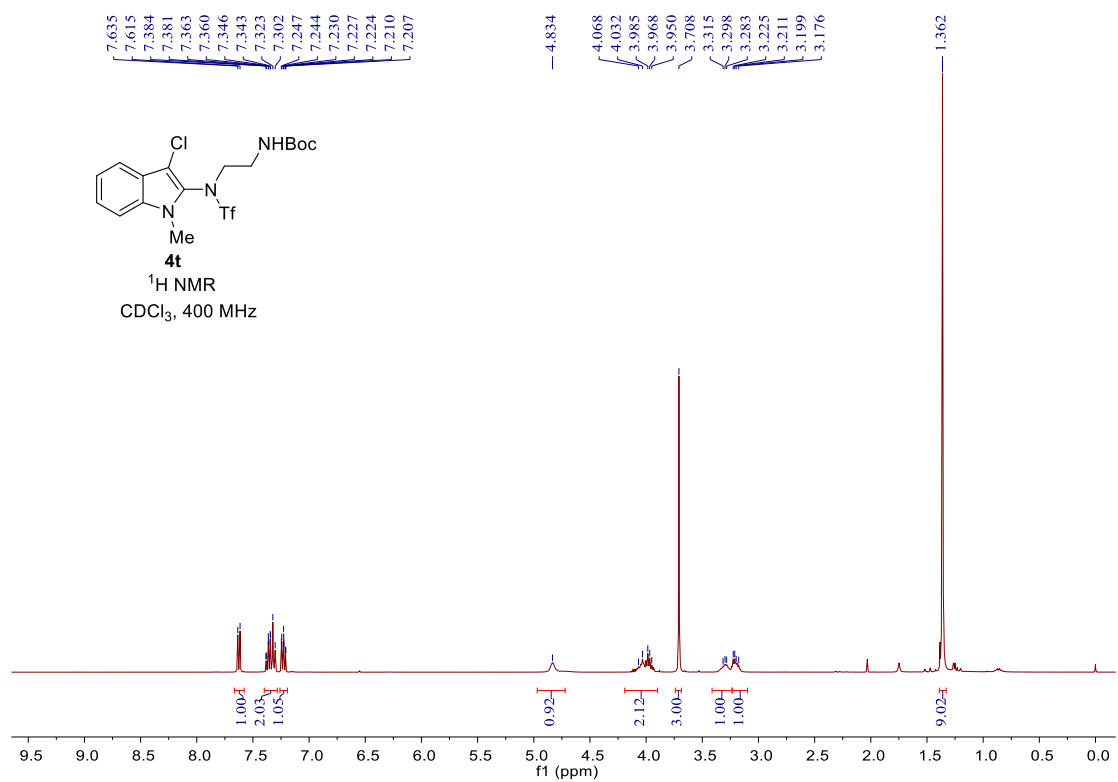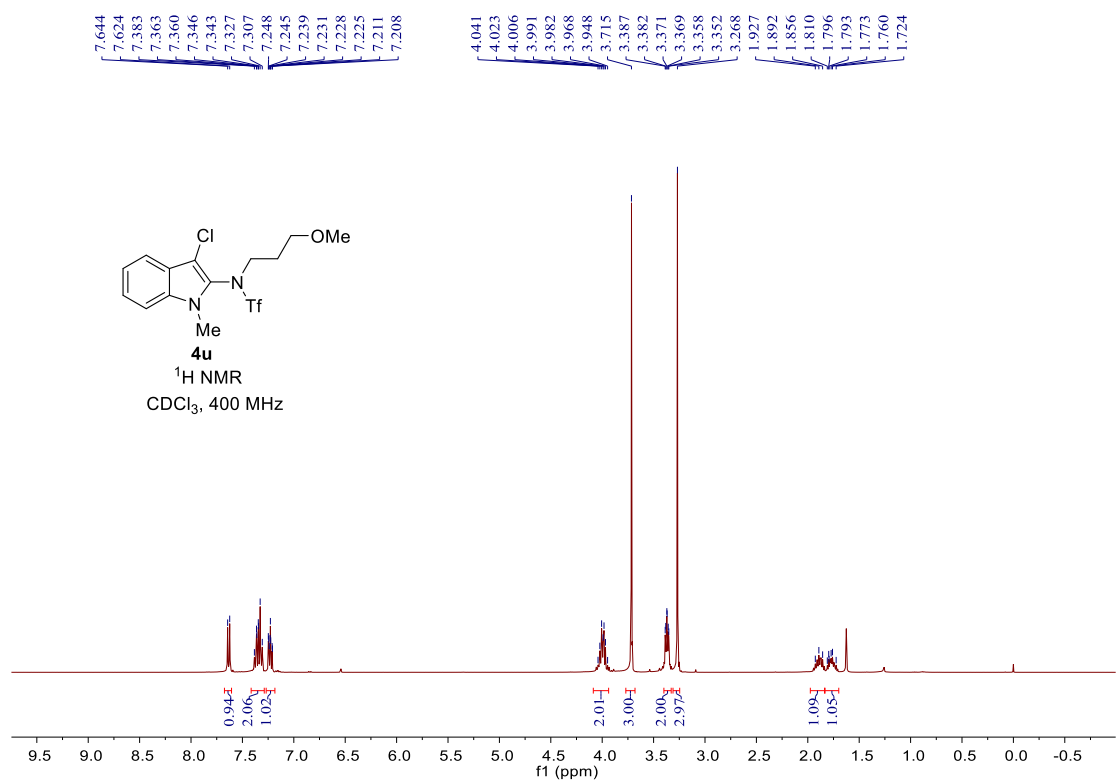

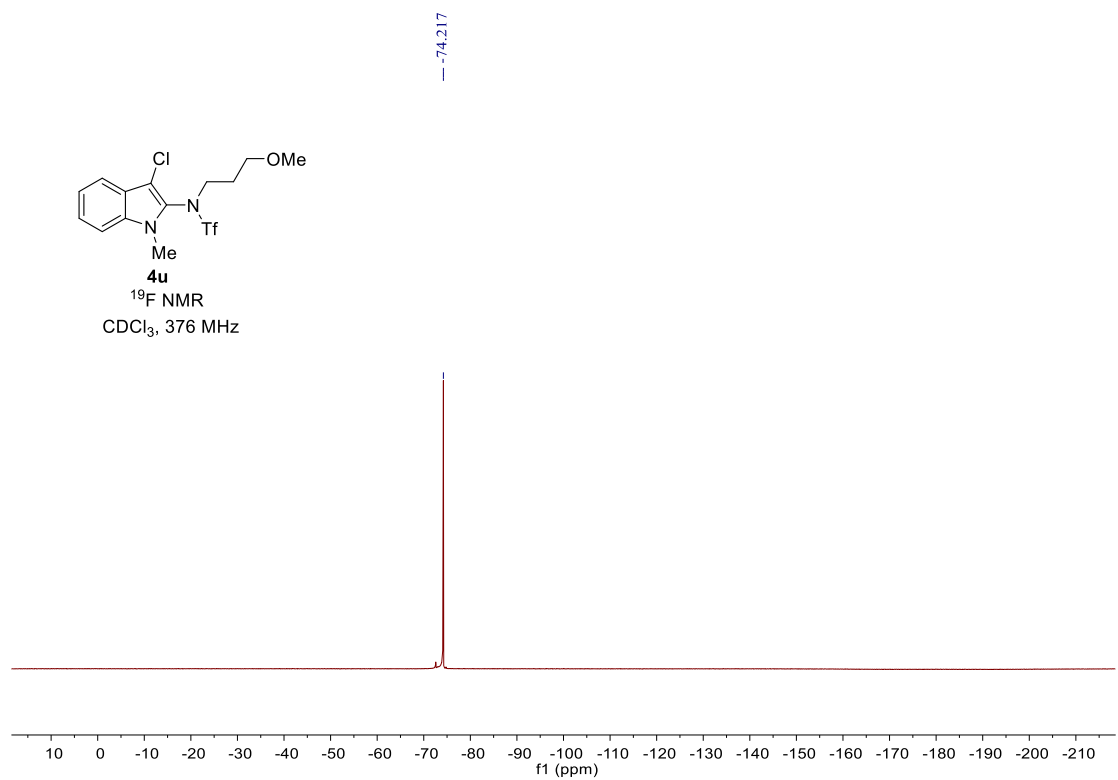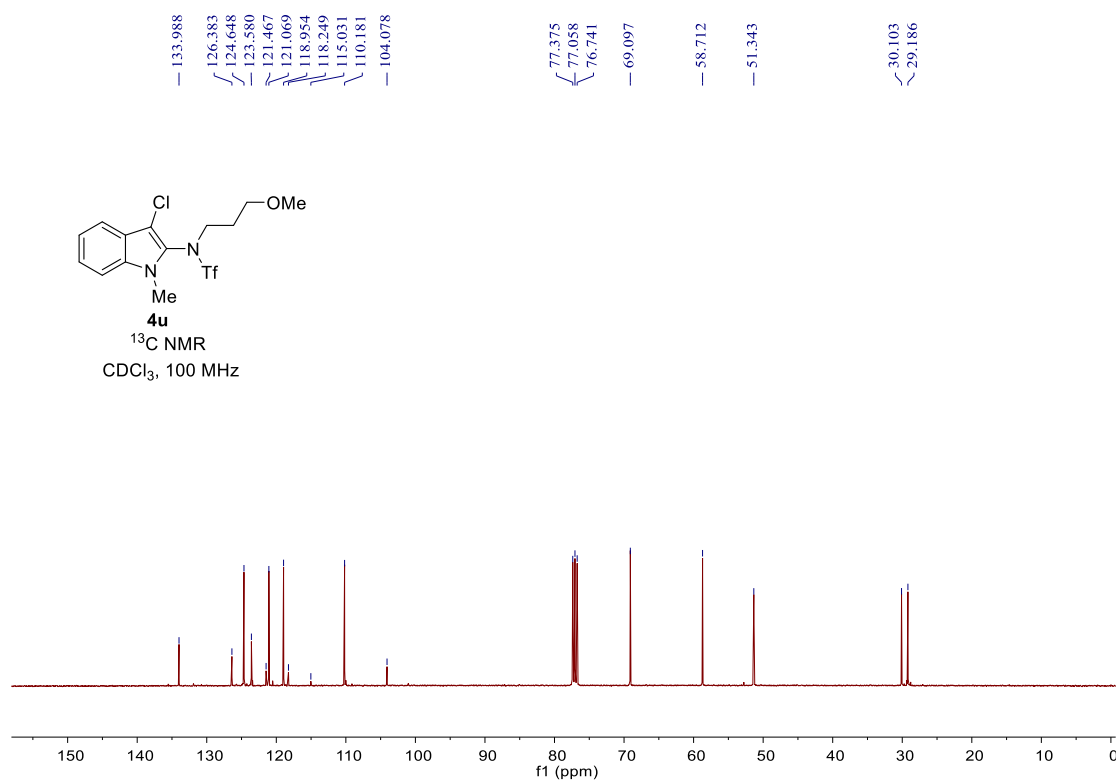

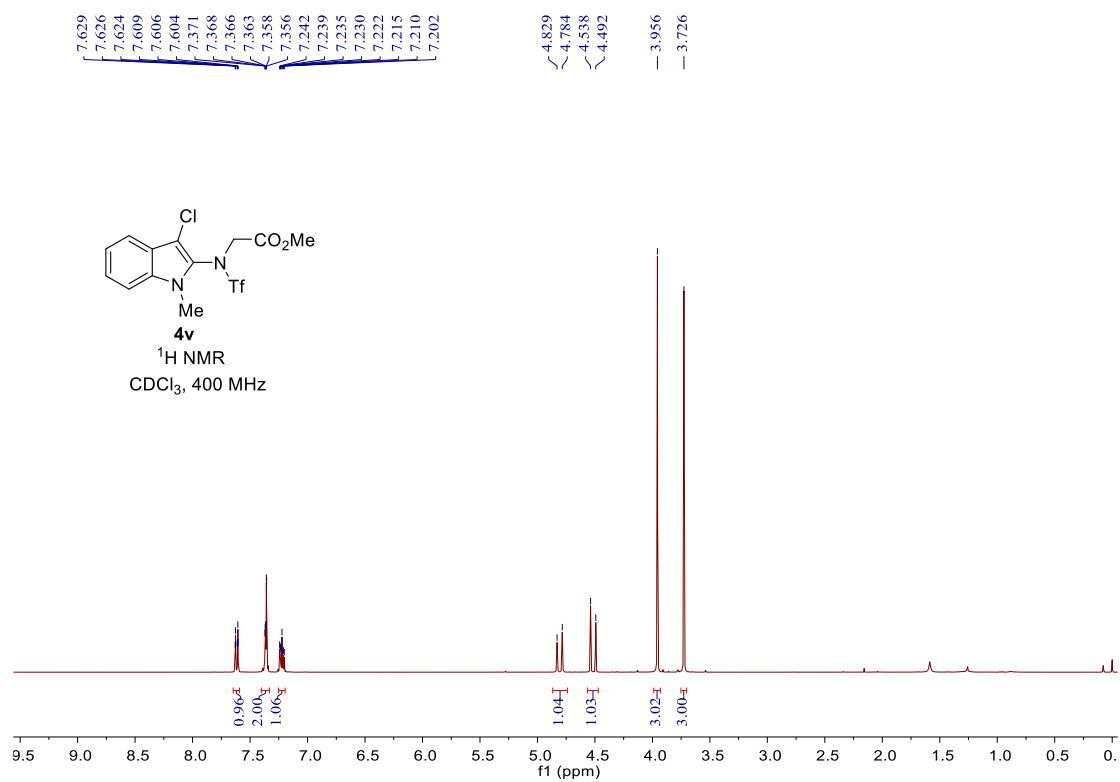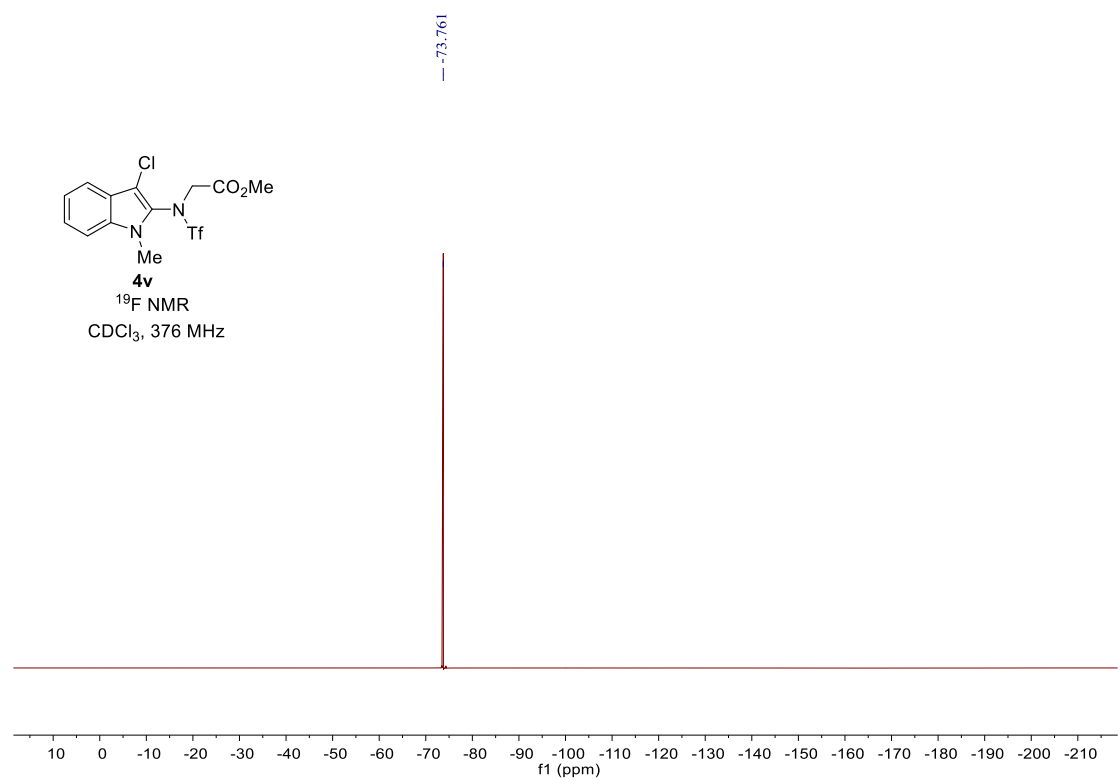

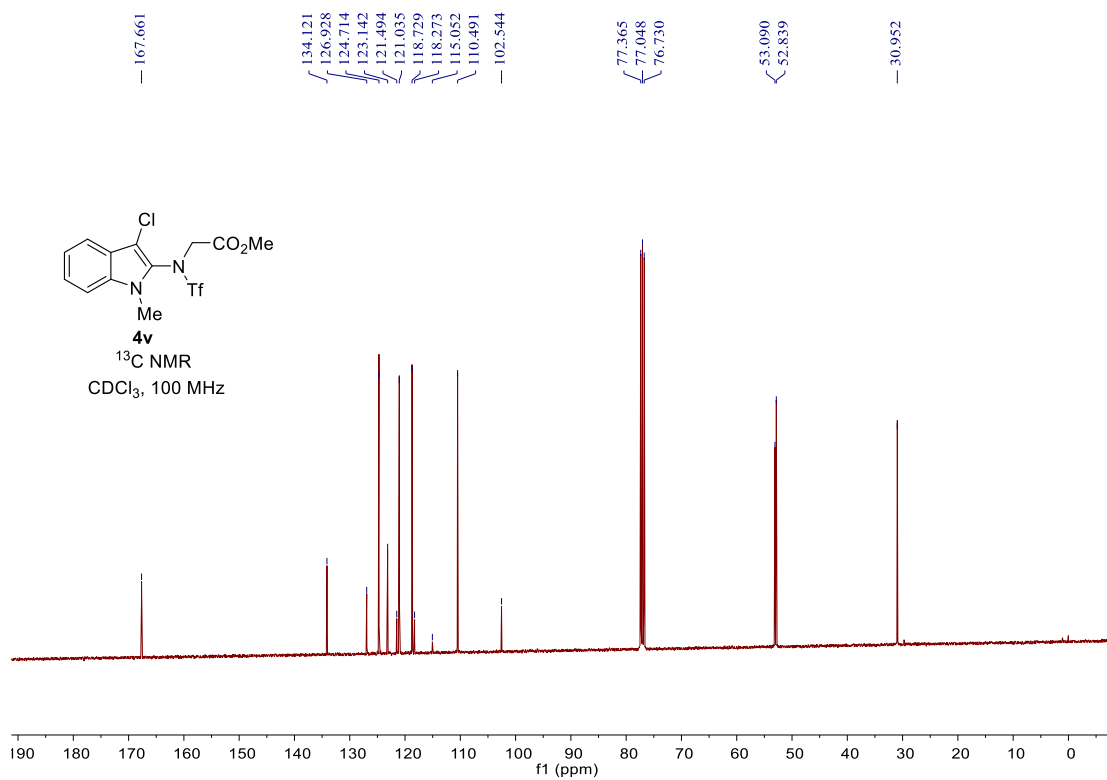

Supplement: c7qo00199a1.pdf [file c7qo00199a1.pdf]
